# Supplementary material for: Daily mango ( Mangifera indica L.) consumption supplemented with probiotics differentially modulates inflammation and cognitive function in individuals with overweight or obesity: a placebo-controlled, double-blind, and randomized trial
Source: Royal Society of Chemistry journal article supplement (doi:10.1039/d5fo01687h), 2025-12-01
Supplement: d5fo01687h1.xlsx [file d5fo01687h1.xlsx]

## Sheet: Sheet1
ID	Gender	Age	BMI	BMI Range	Treatment	B - TMTA (seconds)	B - TMTB (seconds)	B - DSTF	B - DSTB	F - TMTA (seconds)	F - TMTB (seconds)	F - DSTF	F - DSTB		B - TMTA (seconds)	B - TMTB (seconds)	B - DSTF	B - DSTB
MPCI	Female	18	18.64	18-23	Green	23	38	5	4	15	27	6	3		-8	-11	1	-1
MPEZ	Male	18	22.35	18-23	Green	28	43	6	4	21	52	7	6		-7	9	1	2
MPDC	Male	19	22.59	18-23	Green	36	74	5	5	34	50	8	5		-2	-24	3	0
MPDF	Female	19	19.54	18-23	Green	22	42	6	4	16	39	4	4		-6	-3	-2	0
MPDW	Female	19	21.86	18-23	Green	20	59	6	6	21	82	6	6		1	23	0	0
MPDZ	Female	19	21.4	18-23	Green	33	61	5	3	19	53	5	2		-14	-8	0	-1
MPAR	Male	20	20.66	18-23	Green	47	104	6	3	21	50	7	3		-26	-54	1	0
MPED	Male	20	20.6	18-23	Green	22	64	5	4	30	40	5	5		8	-24	0	1
MPEH	Male	20	22	18-23	Green	23	52	4	4	20	39	4	5		-3	-13	0	1
MPEO	Male	20	20.95	18-23	Green	34	61	4	4	25	34	5	3		-9	-27	1	-1
MPAU	Male	21	21.09	18-23	Green	27	61	9	9	19	30	9	7		-8	-31	0	-2
MPCF	Female	21	18.69	18-23	Green	26	49	6	6	25	38	7	5		-1	-11	1	-1
MPCX	Male	21	24.8	18-23	Green	25	44	7	4	16	35	7	6		-9	-9	0	2
MPDT	Female	21	18.58	18-23	Green	36	63	8	6	26	68	7	3		-10	5	-1	-3
MPEG	Male	21	22.43	18-23	Green	16	48	8	5	15	38	8	6		-1	-10	0	1
MPEA	Female	22	20.12	18-23	Green	19	37	5	3	19	30	5	4		0	-7	0	1
MPAJ	Male	23	22.47	18-23	Green	31	54	7	4	24	36	9	6		-7	-18	2	2
MPAB	Male	24	23.06	18-23	Green	20	49	5	6	20	48	7	4		0	-1	2	-2
MPCV	Male	24	23.76	18-23	Green	23	56	5	4	21	60	6	6		-2	4	1	2
MPCW	Male	27	20.8	18-23	Green	29	59	8	6	15	41	7	4		-14	-18	-1	-2
MPAK	Female	28	23.86	18-23	Green	20	36	5	3	14	37	4	3		-6	1	-1	0
MPBK	Female	29	22.76	18-23	Green	35	54	4	3	24	53	5	3		-11	-1	1	0
MPBA	Female	31	20.82	18-23	Green	25	55	5	5	20	46	5	4		-5	-9	0	-1
MPBF	Female	31	21.42	18-23	Green	35	88	5	5	26	55	3	2		-9	-33	-2	-3
MPAA	Female	18	21.5	18-23	Red	26	60	8	4	15	36	6	4		-11	-24	-2	0
MPBJ	Male	18	20.52	18-23	Red	22	61	4	3	15	67	5	3		-7	6	1	0
MPBV	Male	19	24.13	18-23	Red	21	107	4	2	19	75	6	4		-2	-32	2	2
MPCU	Female	19	17.92	18-23	Red	37	49	5	4	19	41	6	5		-18	-8	1	1
MPDD	Female	19	19.13	18-23	Red	19	58	6	4	23	41	6	6		4	-17	0	2
MPDG	Female	19	17.54	18-23	Red	23	82	5	3	23	48	4	4		0	-34	-1	1
MPCK	Female	20	19.21	18-23	Red	23	49	8	6	23	38	9	7		0	-11	1	1
MPDX	Male	20	22.7	18-23	Red	22	53	4	4	20	52	7	4		-2	-1	3	0
MPBP	Female	21	20.09	18-23	Red	15	66	8	5	12	28	8	6		-3	-38	0	1
MPCC	Female	21	22.82	18-23	Red	25	95	6	3	30	58	5	4		5	-37	-1	1
MPBN	Female	22	21.27	18-23	Red	44	48	6	2	31	48	6	2		-13	0	0	0
MPDP	Male	22	22.26	18-23	Red	21	68	5	3	25	72	6	3		4	4	1	0
MPEX	Male	22	21.45	18-23	Red	24	74	5	5	27	136	6	5		3	62	1	0
MPFA	Female	22	20.65	18-23	Red	15	30	5	4	12	28	6	6		-3	-2	1	2
MPAH	Female	23	21.4	18-23	Red	21	39	7	3	17	39	6	4		-4	0	-1	1
MPBL	Male	23	23.66	18-23	Red	30	48	5	4	22	95	6	4		-8	47	1	0
MPEI	Male	23	22.51	18-23	Red	28	55	3	4	21	47	6	6		-7	-8	3	2
MPEE	Male	24	20.57	18-23	Red	21	54	7	6	17	46	6	5		-4	-8	-1	-1
MPDE	Female	25	24.48	18-23	Red	24	52	4	2	26	56	4	4		2	4	0	2
MPDR	Male	26	21.77	18-23	Red	24	55	3	3	18	70	5	2		-6	15	2	-1
MPBH	Female	27	19.57	18-23	Red	45	46	4	5	18	36	6	4		-27	-10	2	-1
MPAN	Male	28	19.57	18-23	Red	55	88	5	3	32	69	5	4		-23	-19	0	1
MPBM	Male	29	21.41	18-23	Red	21	53	4	3	25	89	4	2		4	36	0	-1
MPBO	Female	47	22.28	18-23	Red	17	42	4	3	19	48	6	4		2	6	2	1
MPCZ	Female	55	22.76	18-23	Red	23	42	6	3	20	31	8	5		-3	-11	2	2
MPDM	Female	18	27.56	27-35	Green	17	35	7	4	17	34	7	5		0	-1	0	1
MPAS	Female	20	29.05	27-35	Green	14	61	9	6	14	45	7	6		0	-16	-2	0
MPBX	Male	20	33.75	27-35	Green	19	45	6	4	14	28	9	6		-5	-17	3	2
MPEY	Male	20	33.73	27-35	Green	24	60	5	2	21	54	5	2		-3	-6	0	0
MPBQ	Male	21	33.12	27-35	Green	25	56	7	5	27	45	4	6		2	-11	-3	1
MPDK	Male	21	29.58	27-35	Green	24	56	6	7	17	132	6	5		-7	76	0	-2
MPDU	Female	21	29.05	27-35	Green	29	80	6	3	31	62	6	3		2	-18	0	0
MPAO	Male	22	30.51	27-35	Green	25	43	6	3	22	43	7	5		-3	0	1	2
MPAX	Male	22	28.45	27-35	Green	23	54	7	4	24	35	7	5		1	-19	0	1
MPCR	Female	22	29.17	27-35	Green	25	45	5	3	26	57	8	4		1	12	3	1
MPCY	Female	22	32.39	27-35	Green	28	47	4	4	26	67	6	5		-2	20	2	1
MPEL	Male	23	27.09	27-35	Green	28	65	7	3	29	57	7	3		1	-8	0	0
MPBB	Female	31	30.68	27-35	Green	28	45	6	7	13	30	8	7		-15	-15	2	0
MPAD	Male	32	32.56	27-35	Green	22	56	7	4	15	63	6	5		-7	7	-1	1
MPBY	Male	32	27.1	27-35	Green	31	69	9	5	27	79	8	6		-4	10	-1	1
MPCO	Female	36	30.86	27-35	Green	29	48	4	5	25	48	6	5		-4	0	2	0
MPEJ	Male	42	29.02	27-35	Green	21	58	7	5	19	54	7	5		-2	-4	0	0
MPAI	Female	44	34.98	27-35	Green	29	70	5	5	28	47	7	5		-1	-23	2	0
MPDB	Female	52	33.11	27-35	Green	25	58	4	3	33	47	6	3		8	-11	2	0
MPDS	Male	52	29.24	27-35	Green	30	49	7	3	25	45	6	3		-5	-4	-1	0
MPEN	Male	55	35.48	27-35	Green	34	57	6	2	29	56	5	3		-5	-1	-1	1
MPET	Female	19	28.2	27-35	Red	20	53	7	3	20	64	7	4		0	11	0	1
MPAZ	Female	21	28.88	27-35	Red	21	63	4	4	23	32	4	4		2	-31	0	0
MPDN	Male	21	29.28	27-35	Red	25	71	4	3	20	52	5	4		-5	-19	1	1
MPEK	Male	21	32.72	27-35	Red	23	49	7	6	20	45	7	7		-3	-4	0	1
MPAF	Male	22	27.61	27-35	Red	24	47	9	4	16	32	8	6		-8	-15	-1	2
MPAP	Male	23	27.87	27-35	Red	32	66	4	4	17	43	5	4		-15	-23	1	0
MPBC	Female	24	28.89	27-35	Red	20	42	7	6	14	27	7	5		-6	-15	0	-1
MPAW	Male	25	30.95	27-35	Red	23	34	4	3	12	47	4	4		-11	13	0	1
MPAV	Female	26	27.43	27-35	Red	29	74	5	4	20	48	3	4		-9	-26	-2	0
MPCJ	Female	26	33.96	27-35	Red	24	46	7	6	24	49	6	6		0	3	-1	0
MPAG	Male	27	30.15	27-35	Red	25	48	6	4	19	35	4	5		-6	-13	-2	1
MPDH	Female	28	29.18	27-35	Red	19	33	4	3	16	29	6	3		-3	-4	2	0
MPAL	Female	29	30.61	27-35	Red	18	41	5	4	15	26	6	4		-3	-15	1	0
MPEU	Female	30	27.7	27-35	Red	27	71	5	4	17	47	5	5		-10	-24	0	1
MPES	Male	31	26.45	27-35	Red	33	56	4	5	30	45	6	6		-3	-11	2	1
MPCS	Female	34	26.88	27-35	Red	20	46	6	4	18	41	6	3		-2	-5	0	-1
MPCD	Female	39	32.88	27-35	Red	21	34	6	3	22	39	6	4		1	5	0	1
MPEV	Male	45	34.25	27-35	Red	29	56	7	6	35	59	8	6		6	3	1	0
MPDI	Female	48	33.79	27-35	Red	24	55	4	3	26	50	5	4		2	-5	1	1
MPDL	Male	51	32.66	27-35	Red	18	64	7	3	21	87	7	4		3	23	0	1
MPDQ	Male	53	34.38	27-35	Red	22	57	6	5	26	69	6	6		4	12	0	1
MPEB	Male	54	35.55	27-35	Red	30	57	5	5	23	56	5	5		-7	-1	0	0
MPEC	Female	55	29.56	27-35	Red	61	66	6	4	48	56	6	2		-13	-10	0	-2
MPEQ	Female	60	32.59	27-35	Red	22	70	4	2	32	65	5	4		10	-5	1	2
MPEM	Male	62	30.39	27-35	Red	34	74	4	4	39	82	4	4		5	8	0	0

## Sheet: Sheet2
							ID	BMI Range	Treatment	TMTA (seconds)	TMTB (seconds)	DSTF	DSTB
1	AJ	8	LEAN	GREEN			AJ	18-23	Green	-7	-18	2	2
2	AK	8	LEAN	GREEN			AK	18-23	Green	-6	1	-1	0
3	AR	8	LEAN	GREEN			AR	18-23	Green	-26	-54	1	0
4	AS	8	LEAN	GREEN			AB	18-23	Green	0	-1	2	-2
5	AU	8	LEAN	GREEN			AU	18-23	Green	-8	-31	0	-2
6	BA	8	LEAN	GREEN			BA	18-23	Green	-5	-9	0	-1
7	BF	8	LEAN	GREEN			BF	18-23	Green	-9	-33	-2	-3
8	BM	8	LEAN	GREEN			BK	18-23	Green	-11	-1	1	0
9	BP	8	LEAN	GREEN
10	CF	8	LEAN	GREEN			CF	18-23	Green	-1	-11	1	-1
11	CI	8	LEAN	GREEN			CI	18-23	Green	-8	-11	1	-1
12	CV	8	LEAN	GREEN			CV	18-23	Green	-2	4	1	2
13	CW	8	LEAN	GREEN			CW	18-23	Green	-14	-18	-1	-2
14	CX	8	LEAN	GREEN			CX	18-23	Green	-9	-9	0	2
15	DC	8	LEAN	GREEN			DC	18-23	Green	-2	-24	3	0
16	DF	8	LEAN	GREEN			DF	18-23	Green	-6	-3	-2	0
17	DT	8	LEAN	GREEN			DT	18-23	Green	-10	5	-1	-3
18	DW	8	LEAN	GREEN			DW	18-23	Green	1	23	0	0
19	DZ	8	LEAN	GREEN			DZ	18-23	Green	-14	-8	0	-1
20	EA	8	LEAN	GREEN			EA	18-23	Green	0	-7	0	1
21	ED	8	LEAN	GREEN			ED	18-23	Green	8	-24	0	1
22	EG	8	LEAN	GREEN			EG	18-23	Green	-1	-10	0	1
23	EH	8	LEAN	GREEN			EH	18-23	Green	-3	-13	0	1
24	EO	8	LEAN	GREEN			EO	18-23	Green	-9	-27	1	-1
25	EZ	8	LEAN	GREEN			EZ	18-23	Green	-7	9	1	2
26	AA	8	LEAN	RED			AA	18-23	Red	-11	-24	-2	0
27	AB	8	LEAN	RED			BM	18-23	Red	4	36	0	-1
28	AH	8	LEAN	RED			AH	18-23	Red	-4	0	-1	1
29	AN	8	LEAN	RED			AN	18-23	Red	-23	-19	0	1
30	AP	8	LEAN	RED			BP	18-23	Red	-3	-38	0	1
31	BH	8	LEAN	RED			BH	18-23	Red	-27	-10	2	-1
32	BJ	8	LEAN	RED			BJ	18-23	Red	-7	6	1	0
33	BL	8	LEAN	RED			BL	18-23	Red	-8	47	1	0
34	BN	8	LEAN	RED			BN	18-23	Red	-13	0	0	0
35	BO	8	LEAN	RED			BO	18-23	Red	2	6	2	1
36	BV	8	LEAN	RED			BV	18-23	Red	-2	-32	2	2
37	CC	8	LEAN	RED			CC	18-23	Red	5	-37	-1	1
38	CK	8	LEAN	RED			CK	18-23	Red	0	-11	1	1
39	CU	8	LEAN	RED			CU	18-23	Red	-18	-8	1	1
40	CZ	8	LEAN	RED			CZ	18-23	Red	-3	-11	2	2
41	DD	8	LEAN	RED			DD	18-23	Red	4	-17	0	2
42	DE	8	LEAN	RED			DE	18-23	Red	2	4	0	2
43	DG	8	LEAN	RED			DG	18-23	Red	0	-34	-1	1
44	DP	8	LEAN	RED			DP	18-23	Red	4	4	1	0
45	DR	8	LEAN	RED			DR	18-23	Red	-6	15	2	-1
46	DX	8	LEAN	RED			DX	18-23	Red	-2	-1	3	0
47	EE	8	LEAN	RED			EE	18-23	Red	-4	-8	-1	-1
48	EI	8	LEAN	RED			EI	18-23	Red	-7	-8	3	2
49	EX	8	LEAN	RED			EX	18-23	Red	3	62	1	0
50	FA	8	LEAN	RED			FA	18-23	Red	-3	-2	1	2
51	AD	8	OBESE	GREEN			AD	27-35	Green	-7	7	-1	1
52	AI	8	OBESE	GREEN			AI	27-35	Green	-1	-23	2	0
53	AO	8	OBESE	GREEN			AO	27-35	Green	-3	0	1	2
54	AX	8	OBESE	GREEN			AX	27-35	Green	1	-19	0	1
55	BB	8	OBESE	GREEN			BB	27-35	Green	-15	-15	2	0
56	BQ	8	OBESE	GREEN			BQ	27-35	Green	2	-11	-3	1
57	BX	8	OBESE	GREEN			BX	27-35	Green	-5	-17	3	2
58	BY	8	OBESE	GREEN			BY	27-35	Green	-4	10	-1	1
59	CD	8	OBESE	GREEN			AS	27-35	Green	0	-16	-2	0
60	CO	8	OBESE	GREEN			CO	27-35	Green	-4	0	2	0
61	CR	8	OBESE	GREEN			CR	27-35	Green	1	12	3	1
62	CY	8	OBESE	GREEN			CY	27-35	Green	-2	20	2	1
63	DB	8	OBESE	GREEN			DB	27-35	Green	8	-11	2	0
64	DK	8	OBESE	GREEN			DK	27-35	Green	-7	76	0	-2
65	DM	8	OBESE	GREEN			DM	27-35	Green	0	-1	0	1
66	DS	8	OBESE	GREEN			DS	27-35	Green	-5	-4	-1	0
67	DU	8	OBESE	GREEN			DU	27-35	Green	2	-18	0	0
68	EJ	8	OBESE	GREEN			EJ	27-35	Green	-2	-4	0	0
69	EL	8	OBESE	GREEN			EL	27-35	Green	1	-8	0	0
70	EN	8	OBESE	GREEN			EN	27-35	Green	-5	-1	-1	1
71	EY	8	OBESE	GREEN			EY	27-35	Green	-3	-6	0	0
72	AF	8	OBESE	RED			AF	27-35	Red	-8	-15	-1	2
73	AG	8	OBESE	RED			AG	27-35	Red	-6	-13	-2	1
74	AL	8	OBESE	RED			AL	27-35	Red	-3	-15	1	0
75	AV	8	OBESE	RED			AV	27-35	Red	-9	-26	-2	0
76	AW	8	OBESE	RED			AW	27-35	Red	-11	13	0	1
77	AZ	8	OBESE	RED			AZ	27-35	Red	2	-31	0	0
78	BC	8	OBESE	RED			BC	27-35	Red	-6	-15	0	-1
79	CJ	8	OBESE	RED			CJ	27-35	Red	0	3	-1	0
80	DH	8	OBESE	RED			DH	27-35	Red	-3	-4	2	0
81	DI	8	OBESE	RED			DI	27-35	Red	2	-5	1	1
82	DL	8	OBESE	RED			DL	27-35	Red	3	23	0	1
83	DN	8	OBESE	RED			DN	27-35	Red	-5	-19	1	1
84	DQ	8	OBESE	RED			DQ	27-35	Red	4	12	0	1
85	EC	8	OBESE	RED			EC	27-35	Red	-13	-10	0	-2
86	EM	8	OBESE	RED			EM	27-35	Red	5	8	0	0
87	EQ	8	OBESE	RED			EQ	27-35	Red	10	-5	1	2
88	ES	8	OBESE	RED			ES	27-35	Red	-3	-11	2	1
89	ET	8	OBESE	RED			ET	27-35	Red	0	11	0	1
90	EU	8	OBESE	RED			EU	27-35	Red	-10	-24	0	1
91	EV	8	OBESE	RED			EV	27-35	Red	6	3	1	0

## Sheet: Gender
ID	Gender	Age	BMI	BMI Range	Treatment	B - TMTA (seconds)	B - TMTB (seconds)	B - DSTF	B - DSTB	F - TMTA (seconds)	F - TMTB (seconds)	F - DSTF	F - DSTB		B - TMTA (seconds)	B - TMTB (seconds)	B - DSTF	B - DSTB
MPCI	Female	18	18.64	18-23	Green	23	38	5	4	15	27	6	3		-8	-11	1	-1
MPDF	Female	19	19.54	18-23	Green	22	42	6	4	16	39	4	4		-6	-3	-2	0
MPDW	Female	19	21.86	18-23	Green	20	59	6	6	21	82	6	6		1	23	0	0
MPDZ	Female	19	21.4	18-23	Green	33	61	5	3	19	53	5	2		-14	-8	0	-1
MPCF	Female	21	18.69	18-23	Green	26	49	6	6	25	38	7	5		-1	-11	1	-1
MPDT	Female	21	18.58	18-23	Green	36	63	8	6	26	68	7	3		-10	5	-1	-3
MPEA	Female	22	20.12	18-23	Green	19	37	5	3	19	30	5	4		0	-7	0	1
MPAK	Female	28	23.86	18-23	Green	20	36	5	3	14	37	4	3		-6	1	-1	0
MPBK	Female	29	22.76	18-23	Green	35	54	4	3	24	53	5	3		-11	-1	1	0
MPBA	Female	31	20.82	18-23	Green	25	55	5	5	20	46	5	4		-5	-9	0	-1
MPBF	Female	31	21.42	18-23	Green	35	88	5	5	26	55	3	2		-9	-33	-2	-3
MPEZ	Male	18	22.35	18-23	Green	28	43	6	4	21	52	7	6		-7	9	1	2
MPDC	Male	19	22.59	18-23	Green	36	74	5	5	34	50	8	5		-2	-24	3	0
MPAR	Male	20	20.66	18-23	Green	47	104	6	3	21	50	7	3		-26	-54	1	0
MPED	Male	20	20.6	18-23	Green	22	64	5	4	30	40	5	5		8	-24	0	1
MPEH	Male	20	22	18-23	Green	23	52	4	4	20	39	4	5		-3	-13	0	1
MPEO	Male	20	20.95	18-23	Green	34	61	4	4	25	34	5	3		-9	-27	1	-1
MPAU	Male	21	21.09	18-23	Green	27	61	9	9	19	30	9	7		-8	-31	0	-2
MPCX	Male	21	24.8	18-23	Green	25	44	7	4	16	35	7	6		-9	-9	0	2
MPEG	Male	21	22.43	18-23	Green	16	48	8	5	15	38	8	6		-1	-10	0	1
MPAJ	Male	23	22.47	18-23	Green	31	54	7	4	24	36	9	6		-7	-18	2	2
MPAB	Male	24	23.06	18-23	Green	20	49	5	6	20	48	7	4		0	-1	2	-2
MPCV	Male	24	23.76	18-23	Green	23	56	5	4	21	60	6	6		-2	4	1	2
MPCW	Male	27	20.8	18-23	Green	29	59	8	6	15	41	7	4		-14	-18	-1	-2
MPAA	Female	18	21.5	18-23	Red	26	60	8	4	15	36	6	4		-11	-24	-2	0
MPCU	Female	19	17.92	18-23	Red	37	49	5	4	19	41	6	5		-18	-8	1	1
MPDD	Female	19	19.13	18-23	Red	19	58	6	4	23	41	6	6		4	-17	0	2
MPDG	Female	19	17.54	18-23	Red	23	82	5	3	23	48	4	4		0	-34	-1	1
MPCK	Female	20	19.21	18-23	Red	23	49	8	6	23	38	9	7		0	-11	1	1
MPBP	Female	21	20.09	18-23	Red	15	66	8	5	12	28	8	6		-3	-38	0	1
MPCC	Female	21	22.82	18-23	Red	25	95	6	3	30	58	5	4		5	-37	-1	1
MPBN	Female	22	21.27	18-23	Red	44	48	6	2	31	48	6	2		-13	0	0	0
MPFA	Female	22	20.65	18-23	Red	15	30	5	4	12	28	6	6		-3	-2	1	2
MPAH	Female	23	21.4	18-23	Red	21	39	7	3	17	39	6	4		-4	0	-1	1
MPDE	Female	25	24.48	18-23	Red	24	52	4	2	26	56	4	4		2	4	0	2
MPBH	Female	27	19.57	18-23	Red	45	46	4	5	18	36	6	4		-27	-10	2	-1
MPBO	Female	47	22.28	18-23	Red	17	42	4	3	19	48	6	4		2	6	2	1
MPCZ	Female	55	22.76	18-23	Red	23	42	6	3	20	31	8	5		-3	-11	2	2
MPBJ	Male	18	20.52	18-23	Red	22	61	4	3	15	67	5	3		-7	6	1	0
MPBV	Male	19	24.13	18-23	Red	21	107	4	2	19	75	6	4		-2	-32	2	2
MPDX	Male	20	22.7	18-23	Red	22	53	4	4	20	52	7	4		-2	-1	3	0
MPDP	Male	22	22.26	18-23	Red	21	68	5	3	25	72	6	3		4	4	1	0
MPEX	Male	22	21.45	18-23	Red	24	74	5	5	27	136	6	5		3	62	1	0
MPBL	Male	23	23.66	18-23	Red	30	48	5	4	22	95	6	4		-8	47	1	0
MPEI	Male	23	22.51	18-23	Red	28	55	3	4	21	47	6	6		-7	-8	3	2
MPEE	Male	24	20.57	18-23	Red	21	54	7	6	17	46	6	5		-4	-8	-1	-1
MPDR	Male	26	21.77	18-23	Red	24	55	3	3	18	70	5	2		-6	15	2	-1
MPAN	Male	28	19.57	18-23	Red	55	88	5	3	32	69	5	4		-23	-19	0	1
MPBM	Male	29	21.41	18-23	Red	21	53	4	3	25	89	4	2		4	36	0	-1
MPDM	Female	18	27.56	27-35	Green	17	35	7	4	17	34	7	5		0	-1	0	1
MPAS	Female	20	29.05	27-35	Green	14	61	9	6	14	45	7	6		0	-16	-2	0
MPDU	Female	21	29.05	27-35	Green	29	80	6	3	31	62	6	3		2	-18	0	0
MPCR	Female	22	29.17	27-35	Green	25	45	5	3	26	57	8	4		1	12	3	1
MPCY	Female	22	32.39	27-35	Green	28	47	4	4	26	67	6	5		-2	20	2	1
MPBB	Female	31	30.68	27-35	Green	28	45	6	7	13	30	8	7		-15	-15	2	0
MPCO	Female	36	30.86	27-35	Green	29	48	4	5	25	48	6	5		-4	0	2	0
MPAI	Female	44	34.98	27-35	Green	29	70	5	5	28	47	7	5		-1	-23	2	0
MPDB	Female	52	33.11	27-35	Green	25	58	4	3	33	47	6	3		8	-11	2	0
MPBX	Male	20	33.75	27-35	Green	19	45	6	4	14	28	9	6		-5	-17	3	2
MPEY	Male	20	33.73	27-35	Green	24	60	5	2	21	54	5	2		-3	-6	0	0
MPBQ	Male	21	33.12	27-35	Green	25	56	7	5	27	45	4	6		2	-11	-3	1
MPDK	Male	21	29.58	27-35	Green	24	56	6	7	17	132	6	5		-7	76	0	-2
MPAO	Male	22	30.51	27-35	Green	25	43	6	3	22	43	7	5		-3	0	1	2
MPAX	Male	22	28.45	27-35	Green	23	54	7	4	24	35	7	5		1	-19	0	1
MPEL	Male	23	27.09	27-35	Green	28	65	7	3	29	57	7	3		1	-8	0	0
MPAD	Male	32	32.56	27-35	Green	22	56	7	4	15	63	6	5		-7	7	-1	1
MPBY	Male	32	27.1	27-35	Green	31	69	9	5	27	79	8	6		-4	10	-1	1
MPEJ	Male	42	29.02	27-35	Green	21	58	7	5	19	54	7	5		-2	-4	0	0
MPDS	Male	52	29.24	27-35	Green	30	49	7	3	25	45	6	3		-5	-4	-1	0
MPEN	Male	55	35.48	27-35	Green	34	57	6	2	29	56	5	3		-5	-1	-1	1
MPET	Female	19	28.2	27-35	Red	20	53	7	3	20	64	7	4		0	11	0	1
MPAZ	Female	21	28.88	27-35	Red	21	63	4	4	23	32	4	4		2	-31	0	0
MPBC	Female	24	28.89	27-35	Red	20	42	7	6	14	27	7	5		-6	-15	0	-1
MPAV	Female	26	27.43	27-35	Red	29	74	5	4	20	48	3	4		-9	-26	-2	0
MPCJ	Female	26	33.96	27-35	Red	24	46	7	6	24	49	6	6		0	3	-1	0
MPDH	Female	28	29.18	27-35	Red	19	33	4	3	16	29	6	3		-3	-4	2	0
MPAL	Female	29	30.61	27-35	Red	18	41	5	4	15	26	6	4		-3	-15	1	0
MPEU	Female	30	27.7	27-35	Red	27	71	5	4	17	47	5	5		-10	-24	0	1
MPCS	Female	34	26.88	27-35	Red	20	46	6	4	18	41	6	3		-2	-5	0	-1
MPCD	Female	39	32.88	27-35	Red	21	34	6	3	22	39	6	4		1	5	0	1
MPDI	Female	48	33.79	27-35	Red	24	55	4	3	26	50	5	4		2	-5	1	1
MPEC	Female	55	29.56	27-35	Red	61	66	6	4	48	56	6	2		-13	-10	0	-2
MPEQ	Female	60	32.59	27-35	Red	22	70	4	2	32	65	5	4		10	-5	1	2
MPDN	Male	21	29.28	27-35	Red	25	71	4	3	20	52	5	4		-5	-19	1	1
MPEK	Male	21	32.72	27-35	Red	23	49	7	6	20	45	7	7		-3	-4	0	1
MPAF	Male	22	27.61	27-35	Red	24	47	9	4	16	32	8	6		-8	-15	-1	2
MPAP	Male	23	27.87	27-35	Red	32	66	4	4	17	43	5	4		-15	-23	1	0
MPAW	Male	25	30.95	27-35	Red	23	34	4	3	12	47	4	4		-11	13	0	1
MPAG	Male	27	30.15	27-35	Red	25	48	6	4	19	35	4	5		-6	-13	-2	1
MPES	Male	31	26.45	27-35	Red	33	56	4	5	30	45	6	6		-3	-11	2	1
MPEV	Male	45	34.25	27-35	Red	29	56	7	6	35	59	8	6		6	3	1	0
MPDL	Male	51	32.66	27-35	Red	18	64	7	3	21	87	7	4		3	23	0	1
MPDQ	Male	53	34.38	27-35	Red	22	57	6	5	26	69	6	6		4	12	0	1
MPEB	Male	54	35.55	27-35	Red	30	57	5	5	23	56	5	5		-7	-1	0	0
MPEM	Male	62	30.39	27-35	Red	34	74	4	4	39	82	4	4		5	8	0	0

## Sheet: Neurotracker
	Placebo	Probiotics
Lean	2.25	1.97	0.38	0.37
Obese	2.03	1.84	0.38	0.43
	Placebo	Probiotics
Lean	1.63	1.48	0.34	0.33
Obese	1.46	1.34	0.34	0.3
Lean	1.57		0.31
Obese	1.38		0.28
Placebo	1.55		0.3
Probiotics	1.39		0.28
	1st	10th
Lean	1.05	2.15
Obese	0.78	1.97
	0.3	0.35
	0.36	0.4
	1st	10th
Placebo	0.99	2.24
Probiotics	0.83	1.89
	0.3	0.35
	0.36	0.4
