# Supplementary material for: Daily mango ( Mangifera indica L.) consumption supplemented with probiotics differentially modulates inflammation and cognitive function in individuals with overweight or obesity: a placebo-controlled, double-blind, and randomized trial
Source: Royal Society of Chemistry journal article supplement (doi:10.1039/d5fo01687h), 2025-12-01
Supplement: d5fo01687h2.xlsx [file d5fo01687h2.xlsx]

## Sheet: RAW
SUBJECT ID	TIME (Weeks)	AGE	BMI	GENDER	BMI RANGE	TREATMENT	IFNy	IL-10	IL-1b	IL-6	IL-8	TNFa
AF	8	22	27.61	MALE	OBESE	RED	1.424	0.917	0.038	<0.01	2.552	2.807
AF	8	22	27.61	MALE	OBESE	RED	1.252	1.021	0.056	<0.01	2.487	2.831
AA	8	18	21.5	FEMALE	LEAN	RED	3.195	3.11	0.154	1.331	1.542	1.525
AA	8	18	21.5	FEMALE	LEAN	RED	3.252	3.214	0.159	1.351	1.542	1.655
AD	8	32	32.56	MALE	OBESE	GREEN	1.596	3.843	0.447	5.956	8.447	1.915
AD	8	32	32.56	MALE	OBESE	GREEN	1.825	4.052	0.468	7.577	10.617	2.061
A0	8	22	30.51	MALE	OBESE	GREEN	2.568	1.543	0.092	2.049	4.542	1.493
A0	8	22	30.51	MALE	OBESE	GREEN	2.283	1.334	0.056	2.31	4.725	1.704
BC	8	24	28.89	FEMALE	OBESE	RED	1.023	3.057	2.265	2.79	3.975	2.158
BC	8	24	28.89	FEMALE	OBESE	RED	0.85	3.005	1.787	2.79	4.133	2.125
BB	8	31	30.68	FEMALE	OBESE	GREEN	3.423	45.013	0.259	6.713	4.224	1.201
BB	8	31	30.68	FEMALE	OBESE	GREEN	4.106	40.85	0.32	6.335	4.405	1.241
AX	8	22	28.45	MALE	OBESE	GREEN	4.22	19.879	0.331	5.904	4.542	4.999
AX	8	22	28.45	MALE	OBESE	GREEN	5.668	20.199	0.394	4.507	4.496	5.584
AV	8	26	27.43	FEMALE	OBESE	RED	0.331	2.378	0.065	0.306	2.793	1.915
AV	8	26	27.43	FEMALE	OBESE	RED	0.331	2.064	0.047	0.337	3.058	1.72
AW	8	25	30.95	MALE	OBESE	RED	0.965	0.813	0.038	0.193	1.871	1.639
AW	8	25	30.95	MALE	OBESE	RED	1.023	0.397	0.021	0.152	1.701	1.622
AN	8	28	19.57	MALE	LEAN	RED	0.908	1.543	0.074	0.44	2.399	1.493
AN	8	28	19.57	MALE	LEAN	RED	0.908	0.605	0.087	0.522	2.226	1.647
AU	8	21	21.05	MALE	LEAN	GREEN	7.482	3.319	0.259	10.593	16.567	1.541
AU	8	21	21.05	MALE	LEAN	GREEN	6.405	2.796	0.289	10.435	16.971	1.493
BL	8	23	23.66	MALE	LEAN	RED	0.389	3.424	<0.03	0.378	1.946	1.509
BL	8	23	23.66	MALE	LEAN	RED	0.446	3.947	0.038	0.574	2.345	1.85
AJ	8	23	22.47	MALE	LEAN	GREEN	4.277	7.676	0.259	2.832	2.356	2.823
AJ	8	23	22.47	MALE	LEAN	GREEN	3.338	4.996	0.228	3.878	2.465	2.71
BH	8	27	19.57	FEMALE	LEAN	RED	3.85	4.786	0.269	12.559	22.449	1.014
BH	8	27	19.57	FEMALE	LEAN	RED	3.651	5.206	0.336	12.591	23.435	1.103
AZ	8	21	28.88	FEMALE	OBESE	RED	1.94	4.262	0.352	0.729	2.925	1.971
AZ	8	21	28.88	FEMALE	OBESE	RED	2.054	2.848	0.289	0.44	1.967	1.071
AL	8	29	30.61	FEMALE	OBESE	RED	1.711	2.587	0.248	0.44	2.793	1.979
AL	8	29	30.61	FEMALE	OBESE	RED	1.911	2.378	0.259	0.605	2.903	2.239
AH	8	23	21.4	FEMALE	LEAN	RED	2.311	1.23	0.125	0.595	1.333	2.109
AH	8	23	21.4	FEMALE	LEAN	RED	2.397	0.553	0.101	0.46	1.25	1.866
BA	8	31	20.82	FEMALE	LEAN	GREEN	0.677	1.647	0.013	0.44	1.616	2.328
BA	8	31	20.82	FEMALE	LEAN	GREEN	0.677	1.438	0.021	0.275	1.521	1.768
AI	8	44	34.98	FEMALE	OBESE	GREEN	1.338	1.96	0.178	1.185	5.622	6.015
AI	8	44	34.98	FEMALE	OBESE	GREEN	1.31	2.221	0.188	1.227	5.715	6.072
AG	8	27	30.15	MALE	OBESE	RED	3.491	3.927	0.131	0.864	2.094	1.676
AG	8	27	30.15	MALE	OBESE	RED	3.633	4.094	0.091	0.873	2.084	1.804
BO	8	47	22.28	FEMALE	LEAN	RED	11.109	3.047	0.249	10.825	10.81	2.016
BO	8	47	22.28	FEMALE	LEAN	RED	10.849	2.295	0.249	8.901	9.431	1.878
BV	8	19	24.13	MALE	LEAN	RED	3.16	11.305	0.876	31.826	40.203	1.979
BV	8	19	24.13	MALE	LEAN	RED	2.786	10.396	0.876	29.482	38.871	1.988
BX	8	20	33.75	MALE	OBESE	GREEN	2.233	1.719	0.144	0.701	2.075	2.209
BX	8	20	33.75	MALE	OBESE	GREEN	2.096	2.137	0.196	0.721	1.982	2.319
BP	8	21	20.09	FEMALE	LEAN	GREEN	6.963	7.535	0.209	1.059	2.41	1.814
BP	8	21	20.09	FEMALE	LEAN	GREEN	6.463	6.834	0.183	1.151	2.261	2.264
BM	8	29	21.41	MALE	LEAN	GREEN	3.919	2.831	0.209	0.682	2.867	2.374
BM	8	29	21.41	MALE	LEAN	GREEN	4.497	3.102	0.203	0.682	2.97	2.503
BQ	8	21	33.12	MALE	OBESE	GREEN	1.513	1.209	0.077	2.456	4.678	2.2
BQ	8	21	33.12	MALE	OBESE	GREEN	1.468	1.009	0.091	2.386	4.084	2.548
CD	8	39	32.88	FEMALE	OBESE	GREEN	1.87	2.885	0.236	0.948	1.439	1.565
CD	8	39	32.88	FEMALE	OBESE	GREEN	2.416	3.982	0.365	1.51	2.149	2.246
AB	8	24	23.06	MALE	LEAN	RED	0.821	1.259	0.036	0.307	2.69	1.501
AB	8	24	23.06	MALE	LEAN	RED	1.162	1.616	0.104	0.352	2.746	1.758
CF	8	21	18.69	FEMALE	LEAN	GREEN	2.786	1.513	0.144	3.477	4.832	1.924
CF	8	21	18.69	FEMALE	LEAN	GREEN	3.066	1.309	0.177	3.477	5.494	1.694
CI	8	18	18.64	FEMALE	LEAN	GREEN	3.066	4.317	0.275	0.967	1.963	1.676
CI	8	18	18.64	FEMALE	LEAN	GREEN	2.693	3.595	0.196	0.929	2.168	1.657
CC	8	21	22.82	FEMALE	LEAN	RED	2.324	1.719	0.365	16.242	22.627	4.536
CC	8	21	22.82	FEMALE	LEAN	RED	1.96	1.616	0.314	15.273	20.152	4.28
CR	8	22	29.17	FEMALE	OBESE	GREEN	1.78	3.211	0.236	1.51	2.951	2.08
CR	8	22	29.17	FEMALE	OBESE	GREEN	1.78	3.32	0.249	1.634	3.026	2.062
CO	8	36	30.86	FEMALE	OBESE	GREEN	1.513	0.254	0.117	0.481	2.578	3.767
CO	8	36	30.86	FEMALE	OBESE	GREEN	1.513	0.344	0.091	0.418	2.485	3.511
CJ	8	26	33.7	FEMALE	OBESE	RED	4.983	0.389	0.057	0.892	2.28	2.796
CJ	8	26	33.7	FEMALE	OBESE	RED	4.207	0.344	0.043	0.948	2.131	2.759
BY	8	47	27.1	MALE	OBESE	GREEN	3.633	1.719	0.064	1.05	2.615	2.163
BY	8	47	27.1	MALE	OBESE	GREEN	4.4	1.719	0.016	1.114	2.876	2.19
EU	8	20	27.7	FEMALE	OBESE	RED	3.349	2.993	0.196	4.152	6.174	3.584
EU	8	20	27.7	FEMALE	OBESE	RED	3.066	2.777	0.236	4.317	6.124	3.621
CK	8	20	19.21	FEMALE	LEAN	RED	6.463	2.562	0.294	0.662	1.972	1.768
CK	8	20	19.21	FEMALE	LEAN	RED	6.562	2.508	0.236	0.603	1.926	1.694
AS	8	20	18.69	FEMALE	LEAN	GREEN	4.111	3.485	0.05	1.068	2.989	2.356
AS	8	20	18.69	FEMALE	LEAN	GREEN	4.111	3.65	0.077	1.096	2.858	2.631
CS	8	34	26.88	FEMALE	OBESE	RED	3.066	1.009	0.196	3.667	1.477	2.154
CS	8	34	26.88	FEMALE	OBESE	RED	2.786	1.009	0.117	3.771	1.496	2.227
CW	8	27	20.8	MALE	LEAN	GREEN	4.015	1.719	0.17	0.643	1.345	1.399
CW	8	27	20.8	MALE	LEAN	GREEN	5.178	1.771	0.249	0.759	1.627	1.712
CX	8	21	24.8	MALE	LEAN	GREEN	5.867	3.211	0.064	1.457	2.662	2.704
CX	8	21	24.8	MALE	LEAN	GREEN	7.163	3.65	0.111	1.775	3.195	2.759
BN	8	22	21.27	FEMALE	LEAN	RED	6.174	4.127	0.726	1.754	2.596	2.732
BN	8	22	21.27	FEMALE	LEAN	RED	5.936	4.127	0.673	1.609	2.485	2.664
CU	8	19	17.92	FEMALE	LEAN	RED	4.936	5.322	0.148	0.752	3.764	2.778
CU	8	19	17.92	FEMALE	LEAN	RED	5.508	4.855	0.148	0.644	3.789	2.869
CV	8	24	23.76	MALE	LEAN	GREEN	2.92	3.761	0.225	13.458	26.118	2.14
CV	8	24	23.76	MALE	LEAN	GREEN	2.387	4.022	0.233	9.957	20.731	2.049
CY	8	22	32.39	FEMALE	OBESE	GREEN	1.948	0.414	0.179	0.74	3.612	1.993
CY	8	22	32.39	FEMALE	OBESE	GREEN	1.359	0.144	<0.03	0.572	2.758	1.549
DB	8	52	33.11	FEMALE	OBESE	GREEN	18.278	1.793	0.582	3.797	4.299	3.531
DB	8	52	33.11	FEMALE	OBESE	GREEN	21.167	2.119	0.606	4.287	5.539	4.274
DE	8	25	24.48	FEMALE	LEAN	RED	1.309	0.78	0.179	1.222	2.671	1.708
DE	8	25	24.48	FEMALE	LEAN	RED	2.63	2.387	0.643	0.536	2.485	1.139
DI	8	48	33.98	FEMALE	OBESE	RED	4.075	3.183	0.357	1.077	1.677	1.572
DI	8	48	33.98	FEMALE	OBESE	RED	4.171	3.289	0.25	1.102	1.701	1.651
DM	8	18	27.56	FEMALE	OBESE	GREEN	1.21	1.012	0.158	0.356	1.932	2.767
DM	8	18	27.56	FEMALE	OBESE	GREEN	0.862	1.848	0.085	0.476	0.543	1.958
DH	8	28	29.18	FEMALE	OBESE	RED	1.556	0.216	0.085	0.236	2.658	2.186
DH	8	28	29.18	FEMALE	OBESE	RED	1.457	0.284	0.282	0.212	2.435	1.924
DD	8	19	19.13	FEMALE	LEAN	RED	0.862	0.284	0.267	0.164	2.46	2.892
DD	8	19	19.13	FEMALE	LEAN	RED	0.762	<0.09	0.169	0.092	1.968	2.88
DC	8	19	22.59	MALE	LEAN	GREEN	9.198	3.918	0.169	3.895	3.133	2.903
DC	8	19	22.59	MALE	LEAN	GREEN	11.876	3.499	0.372	4.752	3.828	3.188
DK	8	21	27.6	MALE	OBESE	GREEN	16.132	7.028	0.773	6.019	7.249	3.097
DK	8	21	27.6	MALE	OBESE	GREEN	18.138	6.615	0.848	6.587	7.702	3.097
CZ	8	55	22.76	FEMALE	LEAN	RED	3.113	5.114	0.313	13.61	18.603	2.277
CZ	8	55	22.76	FEMALE	LEAN	RED	3.21	4.335	0.313	13.737	17.708	2.345
DF	8	19	19.54	FEMALE	LEAN	GREEN	1.062	3.289	0.198	0.164	3.764	2.493
DF	8	19	19.54	FEMALE	LEAN	GREEN	1.062	3.236	0.113	0.188	3.688	2.436
DN	8	21	29.28	MALE	OBESE	RED	18.837	5.994	0.961	20.345	19.3	4.332
DN	8	21	29.28	MALE	OBESE	RED	19.583	5.166	1.165	23.267	22.07	4.114
DP	8	22	22.26	MALE	LEAN	RED	6.553	14.401	0.216	1.996	2.213	2.55
DP	8	22	22.26	MALE	LEAN	RED	8.727	14.506	0.461	2.457	2.411	2.846
DQ	8	53	34.38	MALE	OBESE	RED	0.56	0.539	0.047	0.128	3.108	2.254
DQ	8	53	34.38	MALE	OBESE	RED	0.56	0.539	<0.03	0.14	2.858	2.368
DR	8	26	22.37	MALE	LEAN	RED	4.936	2.919	0.216	1.246	2.312	2.55
DR	8	26	22.37	MALE	LEAN	RED	4.65	2.441	0.267	1.15	2.435	2.47
DU	8	21	29.05	FEMALE	OBESE	GREEN	2.823	1.24	0.137	4.949	10.595	1.879
DU	8	21	29.05	FEMALE	OBESE	GREEN	2.775	1.574	0.282	4.801	11.323	2.038
EM	8	62	30.39	MALE	OBESE	RED	2.726	2.226	0.179	2.287	8.049	2.254
EM	8	62	30.39	MALE	OBESE	RED	2.92	1.629	0.125	2.142	7.755	2.277
EN	8	55	35.48	MALE	OBESE	GREEN	0.356	<0.09	<0.03	0.524	3.65	3.588
EN	8	55	35.48	MALE	OBESE	GREEN	0.661	<0.09	<0.03	0.704	4.261	4.194
EB	8	54	35.55	MALE	OBESE	RED	1.55912	10.7734	0.163837	41.3443	77.7507	5.1616
EB	8	54	35.55	MALE	OBESE	RED	1.16121	9.67724	0.205027	41.4752	78.7038	4.89975
EC	8	55	29.56	FEMALE	OBESE	RED	1.02824	1.3309	0.0210233	1.20518	6.62377	3.14965
EC	8	55	29.56	FEMALE	OBESE	RED	1.11691	0.477364	0.0128163	1.0559	5.29608	3.45238
EK	8	21	32.72	MALE	OBESE	RED	5.06102	0.917633	0.454728	0.466317	2.80639	5.57836
EK	8	21	32.72	MALE	OBESE	RED	3.6656	< 0.09	0.278978	0.28063	2.62938	4.53792
EH	8	20	22	MALE	LEAN	GREEN	1.11691	0.358829	< 0.03	0.363916	2.59025	4.78373
EH	8	20	22	MALE	LEAN	GREEN	1.33823	0.702418	< 0.03	0.408191	2.68822	4.84171
ED	8	20	20.6	MALE	LEAN	GREEN	2.70267	1.28016	< 0.03	0.0855022	1.51113	2.8909
ED	8	20	20.6	MALE	LEAN	GREEN	2.57107	1.12652	< 0.03	0.0855022	1.61182	2.55088
EL	8	23	27.09	MALE	OBESE	GREEN	2.79036	5.7546	0.00887992	0.63653	3.5589	2.37865
EL	8	23	27.09	MALE	OBESE	GREEN	3.14079	5.38827	< 0.03	0.692323	3.62007	2.46121
EQ	8	60	32.59	FEMALE	OBESE	RED	2.96564	1.28016	< 0.03	0.437369	3.92787	1.41282
EQ	8	60	32.59	FEMALE	OBESE	RED	NaN	0.591466	0.0610451	NaN	3.25514	NaN
ET	8	19	28.2	FEMALE	OBESE	RED	2.65881	1.87742	< 0.03	0.408191	1.59345	1.69938
ET	8	19	28.2	FEMALE	OBESE	RED	3.05323	2.12056	0.0295527	0.523639	1.46564	1.67257
EE	8	24	20.57	MALE	LEAN	RED	1.11691	2.40925	< 0.03	1.78011	7.04484	3.37474
EE	8	24	20.57	MALE	LEAN	RED	1.20549	3.02617	< 0.03	2.16683	7.42438	3.38179
EG	8	21	22.43	MALE	LEAN	GREEN	17.1439	9.12987	1.53769	3.83286	7.40198	3.84252
EG	8	21	22.43	MALE	LEAN	GREEN	18.4304	10.9563	1.67717	4.00914	7.60387	4.00659
EI	8	23	22.51	MALE	LEAN	RED	7.57924	3.49496	0.163837	4.05862	4.82716	1.79346
EI	8	23	22.51	MALE	LEAN	RED	6.01764	2.97905	0.163837	3.95266	5.06092	1.66587
ES	8	31	26.45	MALE	OBESE	RED	2.74652	< 0.09	< 0.03	0.176238	2.93514	3.09357
ES	8	31	26.45	MALE	OBESE	RED	3.22833	1.12652	< 0.03	0.176238	2.95501	2.66849
DL	8	51	32.66	MALE	OBESE	RED	0.761643	0.756961	< 0.03	0.184629	3.56908	2.57852
DL	8	51	32.66	MALE	OBESE	RED	0.761643	0.917633	< 0.03	0.192943	3.31561	2.39239
DG	8	19	17.54	FEMALE	LEAN	RED	5.93075	1.12652	0.0703847	0.63653	2.28965	1.88113
DG	8	19	17.54	FEMALE	LEAN	RED	6.36504	1.63131	0.0656991	0.796097	2.63918	2.26889
DS	8	52	29.24	MALE	OBESE	GREEN	6.01764	3.72796	0.410054	2.81678	6.08593	2.52326
DS	8	52	29.24	MALE	OBESE	GREEN	5.58306	3.30793	0.268285	2.84433	6.22804	2.31686
EJ	8	42	29.02	MALE	OBESE	GREEN	1.99984	2.69524	< 0.03	0.288344	8.94405	2.53707
EJ	8	42	29.02	MALE	OBESE	GREEN	2.52719	3.44826	< 0.03	0.371343	10.346	2.74479
EV	8	45	34.25	MALE	OBESE	RED	2.52719	6.30309	0.257633	39.5451	61.1759	1.18255
EV	8	45	34.25	MALE	OBESE	RED	2.21974	6.30309	0.28971	40.2795	63.7898	1.11731
EY	8	20	33.73	MALE	OBESE	GREEN	7.31926	9.4035	0.477226	14.7625	17.1695	1.4062
EY	8	20	33.73	MALE	OBESE	GREEN	7.70919	8.85631	0.465964	16.2696	19.896	1.23492
EX	8	22	21.45	MALE	LEAN	RED	2.30763	1.12652	< 0.03	0.25727	1.70407	2.65463
EX	8	22	21.45	MALE	LEAN	RED	2.4833	1.12652	< 0.03	0.28063	1.57511	2.60617
FA	8	22	20.65	FEMALE	LEAN	RED	1.02824	2.97905	0.0472921	0.241495	3.01474	0.83998
FA	8	22	20.65	FEMALE	LEAN	RED	1.02824	3.07324	0.123615	0.25727	2.77679	0.878337
EZ	8	18	22.35	MALE	LEAN	GREEN	6.45185	1.4819	0.0750999	0.622522	1.55679	1.16948
EZ	8	18	22.35	MALE	LEAN	GREEN	6.88572	1.53187	0.0942299	0.63653	1.48382	1.19563
EO	8	20	20.95	MALE	LEAN	GREEN	12.2436	4.92934	1.02951	1.94271	7.20081	1.26117
EO	8	20	20.95	MALE	LEAN	GREEN	13.1047	5.84609	1.21311	2.06487	8.12294	1.49905
DX	8	20	22.7	MALE	LEAN	RED	4.444	5.015	0.522	0.638	1.285	2.454
DX	8	20	22.7	MALE	LEAN	RED	4.305	4.731	0.522	0.655	1.274	2.562
DT	8	21	18.58	FEMALE	LEAN	GREEN	5.601	2.264	0.29	0.961	1.938	1.912
DT	8	21	18.58	FEMALE	LEAN	GREEN	3.934	2.002	0.208	0.663	1.589	1.589
DW	8	19	21.86	FEMALE	LEAN	GREEN	1.341	0.633	0.063	0.084	2.116	1.486
DW	8	19	21.86	FEMALE	LEAN	GREEN	1.341	0.991	0.069	0.125	1.962	1.57
DZ	8	19	21.4	FEMALE	LEAN	GREEN	2.082	4.309	0.22	0.739	4.61	0.982
DZ	8	19	21.4	FEMALE	LEAN	GREEN	1.989	4.449	0.284	0.858	5.318	1.163
EA	8	22	20.12	FEMALE	LEAN	GREEN	3.425	0.991	0.086	0.271	1.521	1.921
EA	8	22	20.12	FEMALE	LEAN	GREEN	3.749	1.616	0.11	0.356	1.821	2.249
AK	8	28	23.86	FEMALE	LEAN	GREEN	1.248	0.75	0.098	0.084	1.33	1.036
AK	8	28	23.86	FEMALE	LEAN	GREEN	1.155	0.633	0.052	0.071	1.099	0.955
BF	8	31	21.42	FEMALE	LEAN	GREEN	24.587	4.309	0.495	19.733	50.271	2.405
BF	8	31	21.42	FEMALE	LEAN	GREEN	17.796	2.864	0.455	13.615	29.038	2.73
AP	8	23	27.87	MALE	LEAN	RED	5.138	0.991	0.428	1.442	2.516	2.405
AP	8	23	27.87	MALE	LEAN	RED	4.583	0.75	0.415	1.523	2.714	2.201
BJ	8	18	20.52	MALE	LEAN	RED	1.341	5.3	0.127	0.458	2.467	2.356
BJ	8	18	20.52	MALE	LEAN	RED	1.155	5.515	0.134	0.458	2.358	2.162
AR	8	20	20.66	MALE	LEAN	GREEN	0.274	0.086	0.074	1.451	2.529	0.37
AR	8	20	20.66	MALE	LEAN	GREEN	32.006	9.577	1.047	34.623	43.11	3.902
AF	0	22	27.61	MALE	OBESE	RED	0.677	0.605	0.038	<0.01	1.797	2.856
AF	0	22	27.61	MALE	OBESE	RED	0.62	0.761	0.038	<0.01	1.818	2.198
AA	0	18	21.5	FEMALE	LEAN	RED	2.967	2.117	0.12	0.884	2.01	1.817
AA	0	18	21.5	FEMALE	LEAN	RED	2.682	1.438	0.038	0.719	1.521	1.379
AD	0	32	32.56	MALE	OBESE	GREEN	0.965	1.595	0.159	0.957	2.782	2.125
AD	0	32	32.56	MALE	OBESE	GREEN	1.31	3.057	0.31	4.654	7.047	2.539
AO	0	22	30.51	MALE	OBESE	GREEN	2.054	1.021	0.111	2.289	4.931	1.412
AO	0	22	30.51	MALE	OBESE	GREEN	1.654	0.501	0.069	1.31	3.795	1.322
BC	0	24	28.89	FEMALE	OBESE	RED	1.166	2.273	2.203	2.832	6.742	3.083
BC	0	24	28.89	FEMALE	OBESE	RED	1.482	2.221	2.117	2.978	4.908	2.758
BB	0	31	30.68	FEMALE	OBESE	GREEN	3.195	44.628	0.3	6.977	5.947	1.168
BB	0	31	30.68	FEMALE	OBESE	GREEN	2.796	30.143	0.188	4.675	2.925	1.111
AX	0	22	28.45	MALE	OBESE	GREEN	4.078	8.994	0.41	4.046	3.28	2.353
AX	0	22	28.45	MALE	OBESE	GREEN	4.561	7	0.341	3.784	3.147	2.612
AV	0	26	27.43	FEMALE	OBESE	RED	0.389	2.169	0.065	0.46	3.66	2.093
AV	0	26	27.43	FEMALE	OBESE	RED	0.504	2.169	0.025	0.502	3.369	2.012
AW	0	25	30.95	MALE	OBESE	RED	1.137	0.501	0.021	0.173	2.226	2.028
AW	0	25	30.95	MALE	OBESE	RED	1.023	0.397	0.03	0.132	2.096	1.866
AN	0	28	19.57	MALE	LEAN	RED	1.195	0.501	0.074	0.419	2.183	1.842
AN	0	28	19.57	MALE	LEAN	RED	1.023	0.605	0.065	0.46	2.302	1.744
AU	0	21	21.05	MALE	LEAN	GREEN	18.535	3.738	0.373	13.067	16.92	2.369
AU	0	21	21.05	MALE	LEAN	GREEN	18.282	2.221	0.336	11.396	15.21	1.444
BL	0	23	23.66	MALE	LEAN	RED	2.054	3.633	0.259	14.762	17.274	2.596
BL	0	23	23.66	MALE	LEAN	RED	2.225	4	0.289	14.91	17.502	2.596
AJ	0	23	22.47	MALE	LEAN	GREEN	3.594	6.782	0.279	4.413	2.914	2.49
AJ	0	23	22.47	MALE	LEAN	GREEN	4.078	6.361	0.243	4.486	2.859	2.207
BH	0	27	19.57	FEMALE	LEAN	RED	2.853	6.571	0.213	10.72	20.745	0.876
BH	0	27	19.57	FEMALE	LEAN	RED	2.397	4.367	0.193	7.766	17.375	0.925
AZ	0	21	28.88	FEMALE	OBESE	RED	2.454	3.319	0.383	0.646	2.14	1.996
AZ	0	21	28.88	FEMALE	OBESE	RED	1.854	2.848	0.367	0.502	1.606	1.306
AL	0	29	30.61	FEMALE	OBESE	RED	1.711	2.117	0.193	0.677	3.503	2.296
AL	0	29	30.61	FEMALE	OBESE	RED	1.825	2.064	0.269	0.978	2.903	2.125
AH	0	23	21.4	FEMALE	LEAN	RED	2.511	0.397	0.047	0.543	1.27	2.288
AH	0	23	21.4	FEMALE	LEAN	RED	2.397	0.709	0.092	0.564	1.648	2.645
BA	0	31	20.82	FEMALE	LEAN	GREEN	0.562	1.49	0.038	0.615	4.02	2.596
BA	0	31	20.82	FEMALE	LEAN	GREEN	0.62	1.282	0.038	0.481	3.671	2.158
AI	0	44	34.98	FEMALE	OBESE	GREEN	2.482	2.117	0.193	1.997	3.817	4.317
AI	0	44	34.98	FEMALE	OBESE	GREEN	2.682	1.856	0.259	2.456	3.93	4.243
AG	0	27	30.15	MALE	OBESE	RED	2.397	4.419	0.13	0.667	2.399	1.59
AG	0	27	30.15	MALE	OBESE	RED	2.283	3.738	0.097	0.667	2.204	1.574
BO	0	47	22.28	FEMALE	LEAN	RED	15.23	3.982	0.17	8.91	9.021	2.365
BO	0	47	22.28	FEMALE	LEAN	RED	6.562	2.562	0.177	8.401	7.644	1.988
BV	0	19	24.13	MALE	LEAN	RED	2.462	8.362	0.698	25.282	32.355	1.657
BV	0	19	24.13	MALE	LEAN	RED	3.16	10.035	0.8	27.761	38.886	1.666
BX	0	20	33.75	MALE	OBESE	GREEN	1.249	2.137	0.196	0.682	2.858	2.677
BX	0	20	33.75	MALE	OBESE	GREEN	1.337	2.031	0.19	0.623	2.624	2.099
BP	0	21	20.09	FEMALE	LEAN	GREEN	5.966	5.735	0.183	0.948	2.177	2.08
BP	0	21	20.09	FEMALE	LEAN	GREEN	6.115	5.735	0.19	0.929	2.103	1.814
BM	0	29	21.41	MALE	LEAN	GREEN	3.681	3.211	0.249	0.797	3.073	2.979
BM	0	29	21.41	MALE	LEAN	GREEN	3.254	2.455	0.209	0.74	2.858	2.778
BQ	0	21	33.12	MALE	OBESE	GREEN	1.162	1.109	0.05	2.308	5.543	2.759
BQ	0	21	33.12	MALE	OBESE	GREEN	1.162	1.209	0.05	2.612	5.533	3.034
CD	0	39	32.88	FEMALE	OBESE	GREEN	2.508	4.205	0.417	1.205	2.01	2.337
CD	0	39	32.88	FEMALE	OBESE	GREEN	2.601	4.261	0.359	1.259	2.149	2.594
AB	0	24	23.06	MALE	LEAN	RED	1.293	0.717	0.064	0.583	2.429	2.135
AB	0	24	23.06	MALE	LEAN	RED	1.424	0.389	0.043	0.701	2.494	2.043
CF	0	21	18.69	FEMALE	LEAN	GREEN	3.254	1.616	0.262	4.526	7.217	2.154
CF	0	21	18.69	FEMALE	LEAN	GREEN	2.786	1.719	0.209	4.918	7.288	2.227
CI	0	18	18.64	FEMALE	LEAN	GREEN	3.633	3.871	0.326	1.059	3.572	1.933
CI	0	18	18.64	FEMALE	LEAN	GREEN	3.349	4.429	0.352	0.985	3.875	1.878
CC	0	21	22.82	FEMALE	LEAN	RED	1.78	1.209	0.301	14.178	18.413	3.502
CC	0	21	22.82	FEMALE	LEAN	RED	1.337	1.719	0.43	13.918	17.26	3.749
CR	0	22	29.17	FEMALE	OBESE	GREEN	2.278	3.65	0.262	2.56	4.813	2.255
CR	0	22	29.17	FEMALE	OBESE	GREEN	1.78	3.65	0.249	2.378	4.774	2.135
CO	0	36	30.86	FEMALE	OBESE	GREEN	1.735	0.527	0.124	0.502	2.503	4.024
CO	0	36	30.86	FEMALE	OBESE	GREEN	1.87	0.527	0.117	0.522	2.671	4.015
CJ	0	26	33.7	FEMALE	OBESE	RED	6.862	0.862	0.084	1.223	3.073	4.262
CJ	0	26	33.7	FEMALE	OBESE	RED	8.531	1.009	0.064	1.43	3.458	4.536
BY	0	32	27.1	MALE	OBESE	GREEN	5.669	2.562	0.077	1.403	2.764	2.576
BY	0	32	27.1	MALE	OBESE	GREEN	4.69	2.455	0.036	1.296	2.727	2.383
EU	0	30	27.7	FEMALE	OBESE	RED	21.416	12.896	2.294	4.465	5.289	4.701
EU	0	30	27.7	FEMALE	OBESE	RED	21.746	12.466	2.307	4.622	5.494	4.518
CK	0	20	19.21	FEMALE	LEAN	RED	6.363	2.777	0.275	0.583	1.749	1.593
CK	0	20	19.21	FEMALE	LEAN	RED	6.264	2.939	0.314	0.643	1.87	1.694
AS	0	20	18.69	FEMALE	LEAN	GREEN	3.538	1.719	0.05	0.797	3.477	2.594
AS	0	20	18.69	FEMALE	LEAN	GREEN	4.4	2.137	0.111	0.854	3.78	2.723
CS	0	34	26.88	FEMALE	OBESE	RED	2.74	1.009	0.131	5.496	1.117	2.154
CS	0	34	26.88	FEMALE	OBESE	RED	2.879	1.109	0.117	5.373	1.117	1.988
CW	0	27	20.8	MALE	LEAN	GREEN	5.867	2.242	0.255	0.816	1.627	1.62
CW	0	27	20.8	MALE	LEAN	GREEN	5.916	2.402	0.339	0.75	1.477	1.537
CX	0	21	24.8	MALE	LEAN	GREEN	5.817	2.137	0.008	1.323	2.559	2.576
CX	0	21	24.8	MALE	LEAN	GREEN	4.69	2.402	<0.03	1.16	2.391	2.034
BN	0	22	21.27	FEMALE	LEAN	RED	4.65	2.813	0.813	1.573	3.233	2.892
BN	0	22	21.27	FEMALE	LEAN	RED	3.787	2.119	0.493	1.391	2.833	2.641
CU	0	19	17.92	FEMALE	LEAN	RED	3.883	2.548	0.25	0.476	2.783	2.106
CU	0	19	17.92	FEMALE	LEAN	RED	4.888	2.011	0.216	0.524	3.233	2.892
CV	0	24	23.76	MALE	LEAN	GREEN	2.92	3.866	0.4	14.817	27.863	2.71
CV	0	24	23.76	MALE	LEAN	GREEN	2.63	4.231	0.441	15.723	28.871	2.778
CY	0	22	32.39	FEMALE	OBESE	GREEN	1.26	<0.09	<0.03	0.356	2.017	0.991
CY	0	22	32.39	FEMALE	OBESE	GREEN	2.435	0.216	0.372	0.993	3.561	1.936
DB	0	52	33.11	FEMALE	OBESE	GREEN	16.225	3.289	0.865	3.895	4.248	4.08
DB	0	52	33.11	FEMALE	OBESE	GREEN	16.879	3.183	1.094	3.846	5.331	3.874
DE	0	25	24.48	FEMALE	LEAN	RED	3.306	1.463	0.343	0.476	3.259	1.503
DE	0	25	24.48	FEMALE	LEAN	RED	2.726	1.012	0.169	0.356	2.82	1.23
DI	0	48	33.98	FEMALE	OBESE	RED	3.403	2.334	0.085	0.596	1.847	1.572
DI	0	48	33.98	FEMALE	OBESE	RED	3.499	2.866	0.085	0.62	1.968	1.572
DM	0	18	27.56	FEMALE	OBESE	GREEN	0.962	1.127	0.125	0.356	1.701	3.166
DM	0	18	27.56	FEMALE	OBESE	GREEN	0.912	1.127	0.047	0.284	1.604	2.915
DH	0	28	29.18	FEMALE	OBESE	RED	1.062	0.216	0.085	0.212	2.485	1.685
DH	0	28	29.18	FEMALE	OBESE	RED	1.26	<0.09	0.085	0.14	2.559	1.776
DD	0	19	19.13	FEMALE	LEAN	RED	0.862	0.144	0.158	0.045	2.46	2.664
DD	0	19	19.13	FEMALE	LEAN	RED	0.962	0.414	0.198	0.116	2.783	2.744
DC	0	19	22.59	MALE	LEAN	GREEN	8.067	2.548	0.207	2.956	2.559	2.357
DC	0	19	22.59	MALE	LEAN	GREEN	7.122	2.654	0.267	3.017	2.312	2.505
DK	0	21	27.6	MALE	OBESE	GREEN	12.204	5.062	0.714	5.182	6.746	2.767
DK	0	21	27.6	MALE	OBESE	GREEN	14.544	5.787	0.594	5.649	6.508	2.88
CZ	0	55	22.76	FEMALE	LEAN	RED	3.979	4.335	0.42	11.966	15.279	2.152
CZ	0	55	22.76	FEMALE	LEAN	RED	3.787	4.127	0.434	12.105	14.939	2.14
DF	0	19	19.54	FEMALE	LEAN	GREEN	0.962	2.972	0.085	0.212	2.534	2.664
DF	0	19	19.54	FEMALE	LEAN	GREEN	0.912	2.494	<0.03	0.236	2.559	2.527
DN	0	21	29.28	MALE	OBESE	RED	19.536	4.959	0.761	13.889	15.534	3.531
DN	0	21	29.28	MALE	OBESE	RED	22.75	5.425	1.022	13.306	16.503	5.25
DP	0	22	22.26	MALE	LEAN	RED	6.268	10.545	0.4	1.887	2.522	2.71
DP	0	22	22.26	MALE	LEAN	RED	5.127	11.271	0.125	1.536	2.263	2.618
DQ	0	53	34.38	MALE	OBESE	RED	0.56	0.284	<0.03	0.188	3.284	2.846
DQ	0	53	34.38	MALE	OBESE	RED	0.56	0.78	0.113	0.164	3.133	2.789
DR	0	26	22.37	MALE	LEAN	RED	4.936	2.866	0.085	1.029	2.14	2.47
DR	0	26	22.37	MALE	LEAN	RED	5.032	3.446	0.25	1.271	2.584	2.505
DU	0	21	29.05	FEMALE	OBESE	GREEN	2.823	1.574	0.357	9.432	12.889	2.027
DU	0	21	29.05	FEMALE	OBESE	GREEN	2.92	1.684	0.298	10.37	14.262	1.799
EM	0	62	30.39	MALE	OBESE	RED	2.92	2.011	<0.03	1.633	6.746	2.778
EM	0	62	30.39	MALE	OBESE	RED	2.387	1.296	<0.03	1.186	5.826	2.345
EN	0	55	35.48	MALE	OBESE	GREEN	0.661	<0.09	<0.03	0.728	5.098	4.125
EN	0	55	35.48	MALE	OBESE	GREEN	0.56	<0.09	<0.03	0.692	4.942	4.332
EB	0	54	35.55	MALE	OBESE	RED	1.73556	10.225	0.205027	38.9861	75.6025	5.57103
EB	0	54	35.55	MALE	OBESE	RED	1.47081	10.4991	0.205027	40.4745	79.565	5.86499
EC	0	55	29.56	FEMALE	OBESE	RED	1.38244	1.43176	0.00510622	1.5231	8.32725	5.43915
EC	0	55	29.56	FEMALE	OBESE	RED	1.20549	1.3309	< 0.03	1.37437	8.10028	4.61734
EK	0	21	32.72	MALE	OBESE	RED	6.01764	0.534871	0.511163	0.671443	2.06035	4.08524
EK	0	21	32.72	MALE	OBESE	RED	3.75298	0.477364	0.387886	0.466317	2.29927	4.38662
EH	0	20	22	MALE	LEAN	GREEN	1.20549	< 0.09	< 0.03	< 0.01	1.87175	3.45944
EH	0	20	22	MALE	LEAN	GREEN	1.20549	< 0.09	< 0.03	< 0.01	2.07934	3.67898
ED	0	20	20.6	MALE	LEAN	GREEN	2.43939	1.22919	< 0.03	< 0.01	1.52937	3.07255
ED	0	20	20.6	MALE	LEAN	GREEN	2.70267	1.43176	< 0.03	< 0.01	1.52025	3.02357
EL	0	23	27.09	MALE	OBESE	GREEN	2.52719	5.47991	0.0383246	0.537866	2.73738	2.32372
EL	0	23	27.09	MALE	OBESE	GREEN	2.43939	5.29658	< 0.03	0.580334	3.04466	2.68235
EQ	0	60	32.59	FEMALE	OBESE	RED	2.87801	0.917633	< 0.03	0.393506	3.18478	1.22182
EQ	0	60	32.59	FEMALE	OBESE	RED	2.65881	0.810977	< 0.03	0.42281	3.18478	1.3072
ET	0	19	28.2	FEMALE	OBESE	RED	3.5782	2.02362	0.0564243	0.466317	1.61182	1.86087
ET	0	19	28.2	FEMALE	OBESE	RED	4.27676	2.16889	0.0656991	0.495066	1.4475	1.71951
EE	0	24	20.57	MALE	LEAN	RED	1.16121	2.31335	< 0.03	1.54338	6.73425	3.37474
EE	0	24	20.57	MALE	LEAN	RED	1.20549	2.12056	< 0.03	1.53662	5.92248	3.16369
EG	0	21	22.43	MALE	LEAN	GREEN	1.73556	3.02617	< 0.03	1.91559	5.51106	3.70738
EG	0	21	22.43	MALE	LEAN	GREEN	1.99984	2.60017	0.0750999	2.28258	3.66092	2.71703
EI	0	23	22.51	MALE	LEAN	RED	4.88688	1.92626	0.0472921	3.27334	3.85576	1.44594
EI	0	23	22.51	MALE	LEAN	RED	8.0123	3.35474	0.133568	4.39939	5.61895	1.95555
ES	0	31	26.45	MALE	OBESE	RED	3.35958	1.22919	< 0.03	0.303676	3.05464	3.04455
ES	0	31	26.45	MALE	OBESE	RED	3.92766	1.3309	< 0.03	0.341509	3.03468	2.97464
DL	0	51	32.66	MALE	OBESE	RED	0.761643	0.591466	< 0.03	0.176238	3.41671	2.47499
DL	0	51	32.66	MALE	OBESE	RED	0.983867	< 0.09	< 0.03	< 0.01	3.59966	2.77258
DG	0	19	17.54	FEMALE	LEAN	RED	8.22873	1.43176	0.10394	0.994644	2.23203	2.26889
DG	0	19	17.54	FEMALE	LEAN	RED	7.62256	0.917633	0.0942299	0.844231	1.98463	2.11861
DS	0	52	29.24	MALE	OBESE	GREEN	5.93075	4.14552	0.648978	3.40561	6.18427	4.0924
DS	0	52	29.24	MALE	OBESE	GREEN	5.84385	4.37664	0.410054	3.8892	7.57017	4.37223
EJ	0	42	29.02	MALE	OBESE	GREEN	1.60325	3.16724	< 0.03	0.28063	11.9638	3.516
EJ	0	42	29.02	MALE	OBESE	GREEN	1.55912	2.69524	< 0.03	0.249404	12.3699	2.86303
EV	0	45	34.25	MALE	OBESE	RED	1.99984	1.82845	< 0.03	2.17363	4.82716	1.18255
EV	0	45	34.25	MALE	OBESE	RED	1.8237	1.82845	< 0.03	2.13282	4.96512	1.06531
EY	0	20	33.73	MALE	OBESE	GREEN	9.48273	8.94749	0.522525	11.9861	12.5976	1.7128
EY	0	20	33.73	MALE	OBESE	GREEN	7.7958	8.62839	0.437924	20.4244	25.7343	1.32037
EX	0	22	21.45	MALE	LEAN	RED	2.65881	1.53187	< 0.03	0.25727	1.7226	2.50257
EX	0	22	21.45	MALE	LEAN	RED	2.17578	1.53187	< 0.03	0.241495	1.52025	2.50257
FA	0	22	20.65	FEMALE	LEAN	RED	1.02824	2.93188	0.0472921	0.123749	4.21801	0.987636
FA	0	22	20.65	FEMALE	LEAN	RED	0.850614	2.69524	0.00510622	0.0752242	3.48771	0.93609
EZ	0	18	22.35	MALE	LEAN	GREEN	6.79897	2.07214	0.123615	0.775417	1.54765	1.23492
EZ	0	18	22.35	MALE	LEAN	GREEN	7.40593	2.02362	0.118666	0.657495	1.64864	1.24804
EO	0	20	20.95	MALE	LEAN	GREEN	1.161	<0.09	0.557	0.116	0.001	0.613
EO	0	20	20.95	MALE	LEAN	GREEN	1.309	<0.09	0.738	0.128	0.04	0.602
DX	0	20	22.7	MALE	LEAN	RED	6.064	4.731	0.883	0.875	1.487	2.239
DX	0	20	22.7	MALE	LEAN	RED	4.583	4.03	0.495	0.697	1.186	2.415
DT	0	21	18.58	FEMALE	LEAN	GREEN	5.323	2.33	0.146	0.523	1.681	1.864
DT	0	21	18.58	FEMALE	LEAN	GREEN	6.249	2.397	0.183	0.747	2.152	2.056
DW	0	19	21.86	FEMALE	LEAN	GREEN	1.572	0.87	0.063	0.256	2.261	1.759
DW	0	19	21.86	FEMALE	LEAN	GREEN	1.433	0.991	0.041	0.196	1.997	1.646
DZ	0	19	21.4	FEMALE	LEAN	GREEN	2.267	4.449	0.258	0.705	3.996	1.199
DZ	0	19	21.4	FEMALE	LEAN	GREEN	2.499	4.449	0.323	0.68	3.904	1.136
EA	0	22	20.12	FEMALE	LEAN	GREEN	2.638	0.991	0.134	0.363	1.408	1.646
EA	0	22	20.12	FEMALE	LEAN	GREEN	2.823	0.991	0.11	0.317	1.521	1.646
AK	0	28	23.86	FEMALE	LEAN	GREEN	1.526	1.616	0.041	0.084	1.868	0.946
AK	0	28	23.86	FEMALE	LEAN	GREEN	1.526	1.873	0.03	0.111	1.938	1.018
BF	0	31	21.42	FEMALE	LEAN	GREEN	5.37	0.404	0.195	4.34	7.587	0.928
BF	0	31	21.42	FEMALE	LEAN	GREEN	4.907	2.529	0.402	7.549	12.868	4.108
AP	0	23	27.87	MALE	LEAN	RED	3.749	1.114	0.509	1.587	3.474	3.13
AP	0	23	27.87	MALE	LEAN	RED	3.379	1.175	0.604	1.716	3.812	3.22
BJ	0	18	20.52	MALE	LEAN	RED	1.989	6.092	0.146	0.507	2.48	2.553
BJ	0	18	20.52	MALE	LEAN	RED	1.804	4.873	0.164	0.491	2.492	2.572
AR	0	20	20.66	MALE	LEAN	GREEN	26.218	10.49	1.316	35.598	48.283	5.005
AR	0	20	20.66	MALE	LEAN	GREEN	26.405	10.033	1.17	37.635	49.096	3.311
							4.18984	3.54652	0.299536	3.92123	6.80054	2.42824
							IFNy	IL-10	IL-1b	IL-6	IL-8	TNFa
							32.006	45.013	2.307	41.4752	79.565	6.072
							7.63896	12.6922	7.70191	10.5771	11.6998	2.50057

## Sheet: Using 0's
SUBJECT ID	TIME	AGE	BMI	GENDER	BMI RANGE	TREATMENT	IFNy	IL-10	IL-1b	IL-6	IL-8	TNFa
AF	8	22	27.61	MALE	OBESE	RED	1.424	0.917	0.038	0	2.552	2.807
AF	8	22	27.61	MALE	OBESE	RED	1.252	1.021	0.056	0	2.487	2.831
AA	8	18	21.5	FEMALE	LEAN	RED	3.195	3.11	0.154	1.331	1.542	1.525
AA	8	18	21.5	FEMALE	LEAN	RED	3.252	3.214	0.159	1.351	1.542	1.655
AD	8	32	32.56	MALE	OBESE	GREEN	1.596	3.843	0.447	5.956	8.447	1.915
AD	8	32	32.56	MALE	OBESE	GREEN	1.825	4.052	0.468	7.577	10.617	2.061
AO	8	22	30.51	MALE	OBESE	GREEN	2.568	1.543	0.092	2.049	4.542	1.493
AO	8	22	30.51	MALE	OBESE	GREEN	2.283	1.334	0.056	2.31	4.725	1.704
BC	8	24	28.89	FEMALE	OBESE	RED	1.023	3.057	2.265	2.79	3.975	2.158
BC	8	24	28.89	FEMALE	OBESE	RED	0.85	3.005	1.787	2.79	4.133	2.125
BB	8	31	30.68	FEMALE	OBESE	GREEN	3.423	45.013	0.259	6.713	4.224	1.201
BB	8	31	30.68	FEMALE	OBESE	GREEN	4.106	40.85	0.32	6.335	4.405	1.241
AX	8	22	28.45	MALE	OBESE	GREEN	4.22	19.879	0.331	5.904	4.542	4.999
AX	8	22	28.45	MALE	OBESE	GREEN	5.668	20.199	0.394	4.507	4.496	5.584
AV	8	26	27.43	FEMALE	OBESE	RED	0.331	2.378	0.065	0.306	2.793	1.915
AV	8	26	27.43	FEMALE	OBESE	RED	0.331	2.064	0.047	0.337	3.058	1.72
AW	8	25	30.95	MALE	OBESE	RED	0.965	0.813	0.038	0.193	1.871	1.639
AW	8	25	30.95	MALE	OBESE	RED	1.023	0.397	0.021	0.152	1.701	1.622
AN	8	28	19.57	MALE	LEAN	RED	0.908	1.543	0.074	0.44	2.399	1.493
AN	8	28	19.57	MALE	LEAN	RED	0.908	0.605	0.087	0.522	2.226	1.647
AU	8	21	21.05	MALE	LEAN	GREEN	7.482	3.319	0.259	10.593	16.567	1.541
AU	8	21	21.05	MALE	LEAN	GREEN	6.405	2.796	0.289	10.435	16.971	1.493
BL	8	23	23.66	MALE	LEAN	RED	0.389	3.424	0	0.378	1.946	1.509
BL	8	23	23.66	MALE	LEAN	RED	0.446	3.947	0.038	0.574	2.345	1.85
AJ	8	23	22.47	MALE	LEAN	GREEN	4.277	7.676	0.259	2.832	2.356	2.823
AJ	8	23	22.47	MALE	LEAN	GREEN	3.338	4.996	0.228	3.878	2.465	2.71
BH	8	27	19.57	FEMALE	LEAN	RED	3.85	4.786	0.269	12.559	22.449	1.014
BH	8	27	19.57	FEMALE	LEAN	RED	3.651	5.206	0.336	12.591	23.435	1.103
AZ	8	21	28.88	FEMALE	OBESE	RED	1.94	4.262	0.352	0.729	2.925	1.971
AZ	8	21	28.88	FEMALE	OBESE	RED	2.054	2.848	0.289	0.44	1.967	1.071
AL	8	29	30.61	FEMALE	OBESE	RED	1.711	2.587	0.248	0.44	2.793	1.979
AL	8	29	30.61	FEMALE	OBESE	RED	1.911	2.378	0.259	0.605	2.903	2.239
AH	8	23	21.4	FEMALE	LEAN	RED	2.311	1.23	0.125	0.595	1.333	2.109
AH	8	23	21.4	FEMALE	LEAN	RED	2.397	0.553	0.101	0.46	1.25	1.866
BA	8	31	20.82	FEMALE	LEAN	GREEN	0.677	1.647	0.013	0.44	1.616	2.328
BA	8	31	20.82	FEMALE	LEAN	GREEN	0.677	1.438	0.021	0.275	1.521	1.768
AI	8	44	34.98	FEMALE	OBESE	GREEN	1.338	1.96	0.178	1.185	5.622	6.015
AI	8	44	34.98	FEMALE	OBESE	GREEN	1.31	2.221	0.188	1.227	5.715	6.072
AG	8	27	30.15	MALE	OBESE	RED	3.491	3.927	0.131	0.864	2.094	1.676
AG	8	27	30.15	MALE	OBESE	RED	3.633	4.094	0.091	0.873	2.084	1.804
BO	8	47	22.28	FEMALE	LEAN	RED	11.109	3.047	0.249	10.825	10.81	2.016
BO	8	47	22.28	FEMALE	LEAN	RED	10.849	2.295	0.249	8.901	9.431	1.878
BV	8	19	24.13	MALE	LEAN	RED	3.16	11.305	0.876	31.826	40.203	1.979
BV	8	19	24.13	MALE	LEAN	RED	2.786	10.396	0.876	29.482	38.871	1.988
BX	8	20	33.75	MALE	OBESE	GREEN	2.233	1.719	0.144	0.701	2.075	2.209
BX	8	20	33.75	MALE	OBESE	GREEN	2.096	2.137	0.196	0.721	1.982	2.319
BP	8	21	20.09	FEMALE	LEAN	GREEN	6.963	7.535	0.209	1.059	2.41	1.814
BP	8	21	20.09	FEMALE	LEAN	GREEN	6.463	6.834	0.183	1.151	2.261	2.264
BM	8	29	21.41	MALE	LEAN	GREEN	3.919	2.831	0.209	0.682	2.867	2.374
BM	8	29	21.41	MALE	LEAN	GREEN	4.497	3.102	0.203	0.682	2.97	2.503
BQ	8	21	33.12	MALE	OBESE	GREEN	1.513	1.209	0.077	2.456	4.678	2.2
BQ	8	21	33.12	MALE	OBESE	GREEN	1.468	1.009	0.091	2.386	4.084	2.548
CD	8	39	32.88	FEMALE	OBESE	GREEN	1.87	2.885	0.236	0.948	1.439	1.565
CD	8	39	32.88	FEMALE	OBESE	GREEN	2.416	3.982	0.365	1.51	2.149	2.246
AB	8	24	23.06	MALE	LEAN	RED	0.821	1.259	0.036	0.307	2.69	1.501
AB	8	24	23.06	MALE	LEAN	RED	1.162	1.616	0.104	0.352	2.746	1.758
CF	8	21	18.69	FEMALE	LEAN	GREEN	2.786	1.513	0.144	3.477	4.832	1.924
CF	8	21	18.69	FEMALE	LEAN	GREEN	3.066	1.309	0.177	3.477	5.494	1.694
CI	8	18	18.64	FEMALE	LEAN	GREEN	3.066	4.317	0.275	0.967	1.963	1.676
CI	8	18	18.64	FEMALE	LEAN	GREEN	2.693	3.595	0.196	0.929	2.168	1.657
CC	8	21	22.82	FEMALE	LEAN	RED	2.324	1.719	0.365	16.242	22.627	4.536
CC	8	21	22.82	FEMALE	LEAN	RED	1.96	1.616	0.314	15.273	20.152	4.28
CR	8	22	29.17	FEMALE	OBESE	GREEN	1.78	3.211	0.236	1.51	2.951	2.08
CR	8	22	29.17	FEMALE	OBESE	GREEN	1.78	3.32	0.249	1.634	3.026	2.062
CO	8	36	30.86	FEMALE	OBESE	GREEN	1.513	0.254	0.117	0.481	2.578	3.767
CO	8	36	30.86	FEMALE	OBESE	GREEN	1.513	0.344	0.091	0.418	2.485	3.511
CJ	8	26	33.7	FEMALE	OBESE	RED	4.983	0.389	0.057	0.892	2.28	2.796
CJ	8	26	33.7	FEMALE	OBESE	RED	4.207	0.344	0.043	0.948	2.131	2.759
BY	8	47	27.1	MALE	OBESE	GREEN	3.633	1.719	0.064	1.05	2.615	2.163
BY	8	47	27.1	MALE	OBESE	GREEN	4.4	1.719	0.016	1.114	2.876	2.19
EU	8	20	27.7	FEMALE	OBESE	RED	3.349	2.993	0.196	4.152	6.174	3.584
EU	8	20	27.7	FEMALE	OBESE	RED	3.066	2.777	0.236	4.317	6.124	3.621
CK	8	20	19.21	FEMALE	LEAN	RED	6.463	2.562	0.294	0.662	1.972	1.768
CK	8	20	19.21	FEMALE	LEAN	RED	6.562	2.508	0.236	0.603	1.926	1.694
AS	8	20	18.69	FEMALE	LEAN	GREEN	4.111	3.485	0.05	1.068	2.989	2.356
AS	8	20	18.69	FEMALE	LEAN	GREEN	4.111	3.65	0.077	1.096	2.858	2.631
CS	8	34	26.88	FEMALE	OBESE	RED	3.066	1.009	0.196	3.667	1.477	2.154
CS	8	34	26.88	FEMALE	OBESE	RED	2.786	1.009	0.117	3.771	1.496	2.227
CW	8	27	20.8	MALE	LEAN	GREEN	4.015	1.719	0.17	0.643	1.345	1.399
CW	8	27	20.8	MALE	LEAN	GREEN	5.178	1.771	0.249	0.759	1.627	1.712
CX	8	21	24.8	MALE	LEAN	GREEN	5.867	3.211	0.064	1.457	2.662	2.704
CX	8	21	24.8	MALE	LEAN	GREEN	7.163	3.65	0.111	1.775	3.195	2.759
BN	8	22	21.27	FEMALE	LEAN	RED	6.174	4.127	0.726	1.754	2.596	2.732
BN	8	22	21.27	FEMALE	LEAN	RED	5.936	4.127	0.673	1.609	2.485	2.664
CU	8	19	17.92	FEMALE	LEAN	RED	4.936	5.322	0.148	0.752	3.764	2.778
CU	8	19	17.92	FEMALE	LEAN	RED	5.508	4.855	0.148	0.644	3.789	2.869
CV	8	24	23.76	MALE	LEAN	GREEN	2.92	3.761	0.225	13.458	26.118	2.14
CV	8	24	23.76	MALE	LEAN	GREEN	2.387	4.022	0.233	9.957	20.731	2.049
CY	8	22	32.39	FEMALE	OBESE	GREEN	1.948	0.414	0.179	0.74	3.612	1.993
CY	8	22	32.39	FEMALE	OBESE	GREEN	1.359	0.144	0	0.572	2.758	1.549
DB	8	52	33.11	FEMALE	OBESE	GREEN	18.278	1.793	0.582	3.797	4.299	3.531
DB	8	52	33.11	FEMALE	OBESE	GREEN	21.167	2.119	0.606	4.287	5.539	4.274
DE	8	25	24.48	FEMALE	LEAN	RED	1.309	0.78	0.179	1.222	2.671	1.708
DE	8	25	24.48	FEMALE	LEAN	RED	2.63	2.387	0.643	0.536	2.485	1.139
DI	8	48	33.98	FEMALE	OBESE	RED	4.075	3.183	0.357	1.077	1.677	1.572
DI	8	48	33.98	FEMALE	OBESE	RED	4.171	3.289	0.25	1.102	1.701	1.651
DM	8	18	27.56	FEMALE	OBESE	GREEN	1.21	1.012	0.158	0.356	1.932	2.767
DM	8	18	27.56	FEMALE	OBESE	GREEN	0.862	1.848	0.085	0.476	0.543	1.958
DH	8	28	29.18	FEMALE	OBESE	RED	1.556	0.216	0.085	0.236	2.658	2.186
DH	8	28	29.18	FEMALE	OBESE	RED	1.457	0.284	0.282	0.212	2.435	1.924
DD	8	19	19.13	FEMALE	LEAN	RED	0.862	0.284	0.267	0.164	2.46	2.892
DD	8	19	19.13	FEMALE	LEAN	RED	0.762	0	0.169	0.092	1.968	2.88
DC	8	19	22.59	MALE	LEAN	GREEN	9.198	3.918	0.169	3.895	3.133	2.903
DC	8	19	22.59	MALE	LEAN	GREEN	11.876	3.499	0.372	4.752	3.828	3.188
DK	8	21	27.6	MALE	OBESE	GREEN	16.132	7.028	0.773	6.019	7.249	3.097
DK	8	21	27.6	MALE	OBESE	GREEN	18.138	6.615	0.848	6.587	7.702	3.097
CZ	8	55	22.76	FEMALE	LEAN	RED	3.113	5.114	0.313	13.61	18.603	2.277
CZ	8	55	22.76	FEMALE	LEAN	RED	3.21	4.335	0.313	13.737	17.708	2.345
DF	8	19	19.54	FEMALE	LEAN	GREEN	1.062	3.289	0.198	0.164	3.764	2.493
DF	8	19	19.54	FEMALE	LEAN	GREEN	1.062	3.236	0.113	0.188	3.688	2.436
DN	8	21	29.28	MALE	OBESE	RED	18.837	5.994	0.961	20.345	19.3	4.332
DN	8	21	29.28	MALE	OBESE	RED	19.583	5.166	1.165	23.267	22.07	4.114
DP	8	22	22.26	MALE	LEAN	RED	6.553	14.401	0.216	1.996	2.213	2.55
DP	8	22	22.26	MALE	LEAN	RED	8.727	14.506	0.461	2.457	2.411	2.846
DQ	8	53	34.38	MALE	OBESE	RED	0.56	0.539	0.047	0.128	3.108	2.254
DQ	8	53	34.38	MALE	OBESE	RED	0.56	0.539	0	0.14	2.858	2.368
DR	8	26	22.37	MALE	LEAN	RED	4.936	2.919	0.216	1.246	2.312	2.55
DR	8	26	22.37	MALE	LEAN	RED	4.65	2.441	0.267	1.15	2.435	2.47
DU	8	21	29.05	FEMALE	OBESE	GREEN	2.823	1.24	0.137	4.949	10.595	1.879
DU	8	21	29.05	FEMALE	OBESE	GREEN	2.775	1.574	0.282	4.801	11.323	2.038
EM	8	62	30.39	MALE	OBESE	RED	2.726	2.226	0.179	2.287	8.049	2.254
EM	8	62	30.39	MALE	OBESE	RED	2.92	1.629	0.125	2.142	7.755	2.277
EN	8	55	35.48	MALE	OBESE	GREEN	0.356	0	0	0.524	3.65	3.588
EN	8	55	35.48	MALE	OBESE	GREEN	0.661	0	0	0.704	4.261	4.194
EB	8	54	35.55	MALE	OBESE	RED	1.55912	10.7734	0.163837	41.3443	77.7507	5.1616
EB	8	54	35.55	MALE	OBESE	RED	1.16121	9.67724	0.205027	41.4752	78.7038	4.89975
EC	8	55	29.56	FEMALE	OBESE	RED	1.02824	1.3309	0.0210233	1.20518	6.62377	3.14965
EC	8	55	29.56	FEMALE	OBESE	RED	1.11691	0.477364	0.0128163	1.0559	5.29608	3.45238
EK	8	21	32.72	MALE	OBESE	RED	5.06102	0.917633	0.454728	0.466317	2.80639	5.57836
EK	8	21	32.72	MALE	OBESE	RED	3.6656	0	0.278978	0.28063	2.62938	4.53792
EH	8	20	22	MALE	LEAN	GREEN	1.11691	0.358829	0	0.363916	2.59025	4.78373
EH	8	20	22	MALE	LEAN	GREEN	1.33823	0.702418	0	0.408191	2.68822	4.84171
ED	8	20	20.6	MALE	LEAN	GREEN	2.70267	1.28016	0	0.0855022	1.51113	2.8909
ED	8	20	20.6	MALE	LEAN	GREEN	2.57107	1.12652	0	0.0855022	1.61182	2.55088
EL	8	23	27.09	MALE	OBESE	GREEN	2.79036	5.7546	0.00887992	0.63653	3.5589	2.37865
EL	8	23	27.09	MALE	OBESE	GREEN	3.14079	5.38827	0	0.692323	3.62007	2.46121
EQ	8	60	32.59	FEMALE	OBESE	RED	2.96564	1.28016	0	0.437369	3.92787	1.41282
EQ	8	60	32.59	FEMALE	OBESE	RED	0	0.591466	0.0610451	0	3.25514	0
ET	8	19	28.2	FEMALE	OBESE	RED	2.65881	1.87742	0	0.408191	1.59345	1.69938
ET	8	19	28.2	FEMALE	OBESE	RED	3.05323	2.12056	0.0295527	0.523639	1.46564	1.67257
EE	8	24	20.57	MALE	LEAN	RED	1.11691	2.40925	0	1.78011	7.04484	3.37474
EE	8	24	20.57	MALE	LEAN	RED	1.20549	3.02617	0	2.16683	7.42438	3.38179
EG	8	21	22.43	MALE	LEAN	GREEN	17.1439	9.12987	1.53769	3.83286	7.40198	3.84252
EG	8	21	22.43	MALE	LEAN	GREEN	18.4304	10.9563	1.67717	4.00914	7.60387	4.00659
EI	8	23	22.51	MALE	LEAN	RED	7.57924	3.49496	0.163837	4.05862	4.82716	1.79346
EI	8	23	22.51	MALE	LEAN	RED	6.01764	2.97905	0.163837	3.95266	5.06092	1.66587
ES	8	31	26.45	MALE	OBESE	RED	2.74652	0	0	0.176238	2.93514	3.09357
ES	8	31	26.45	MALE	OBESE	RED	3.22833	1.12652	0	0.176238	2.95501	2.66849
DL	8	51	32.66	MALE	OBESE	RED	0.761643	0.756961	0	0.184629	3.56908	2.57852
DL	8	51	32.66	MALE	OBESE	RED	0.761643	0.917633	0	0.192943	3.31561	2.39239
DG	8	19	17.54	FEMALE	LEAN	RED	5.93075	1.12652	0.0703847	0.63653	2.28965	1.88113
DG	8	19	17.54	FEMALE	LEAN	RED	6.36504	1.63131	0.0656991	0.796097	2.63918	2.26889
DS	8	52	29.24	MALE	OBESE	GREEN	6.01764	3.72796	0.410054	2.81678	6.08593	2.52326
DS	8	52	29.24	MALE	OBESE	GREEN	5.58306	3.30793	0.268285	2.84433	6.22804	2.31686
EJ	8	42	29.02	MALE	OBESE	GREEN	1.99984	2.69524	0	0.288344	8.94405	2.53707
EJ	8	42	29.02	MALE	OBESE	GREEN	2.52719	3.44826	0	0.371343	10.346	2.74479
EV	8	45	34.25	MALE	OBESE	RED	2.52719	6.30309	0.257633	39.5451	61.1759	1.18255
EV	8	45	34.25	MALE	OBESE	RED	2.21974	6.30309	0.28971	40.2795	63.7898	1.11731
EY	8	20	33.73	MALE	OBESE	GREEN	7.31926	9.4035	0.477226	14.7625	17.1695	1.4062
EY	8	20	33.73	MALE	OBESE	GREEN	7.70919	8.85631	0.465964	16.2696	19.896	1.23492
EX	8	22	21.45	MALE	LEAN	RED	2.30763	1.12652	0	0.25727	1.70407	2.65463
EX	8	22	21.45	MALE	LEAN	RED	2.4833	1.12652	0	0.28063	1.57511	2.60617
FA	8	22	20.65	FEMALE	LEAN	RED	1.02824	2.97905	0.0472921	0.241495	3.01474	0.83998
FA	8	22	20.65	FEMALE	LEAN	RED	1.02824	3.07324	0.123615	0.25727	2.77679	0.878337
EZ	8	18	22.35	MALE	LEAN	GREEN	6.45185	1.4819	0.0750999	0.622522	1.55679	1.16948
EZ	8	18	22.35	MALE	LEAN	GREEN	6.88572	1.53187	0.0942299	0.63653	1.48382	1.19563
EO	8	20	20.95	MALE	LEAN	GREEN	12.2436	4.92934	1.02951	1.94271	7.20081	1.26117
EO	8	20	20.95	MALE	LEAN	GREEN	13.1047	5.84609	1.21311	2.06487	8.12294	1.49905
DX	8	20	22.7	MALE	LEAN	RED	4.444	5.015	0.522	0.638	1.285	2.454
DX	8	20	22.7	MALE	LEAN	RED	4.305	4.731	0.522	0.655	1.274	2.562
DT	8	21	18.58	FEMALE	LEAN	GREEN	5.601	2.264	0.29	0.961	1.938	1.912
DT	8	21	18.58	FEMALE	LEAN	GREEN	3.934	2.002	0.208	0.663	1.589	1.589
DW	8	19	21.86	FEMALE	LEAN	GREEN	1.341	0.633	0.063	0.084	2.116	1.486
DW	8	19	21.86	FEMALE	LEAN	GREEN	1.341	0.991	0.069	0.125	1.962	1.57
DZ	8	19	21.4	FEMALE	LEAN	GREEN	2.082	4.309	0.22	0.739	4.61	0.982
DZ	8	19	21.4	FEMALE	LEAN	GREEN	1.989	4.449	0.284	0.858	5.318	1.163
EA	8	22	20.12	FEMALE	LEAN	GREEN	3.425	0.991	0.086	0.271	1.521	1.921
EA	8	22	20.12	FEMALE	LEAN	GREEN	3.749	1.616	0.11	0.356	1.821	2.249
AK	8	28	23.86	FEMALE	LEAN	GREEN	1.248	0.75	0.098	0.084	1.33	1.036
AK	8	28	23.86	FEMALE	LEAN	GREEN	1.155	0.633	0.052	0.071	1.099	0.955
BF	8	31	21.42	FEMALE	LEAN	GREEN	24.587	4.309	0.495	19.733	50.271	2.405
BF	8	31	21.42	FEMALE	LEAN	GREEN	17.796	2.864	0.455	13.615	29.038	2.73
AP	8	23	27.87	MALE	LEAN	RED	5.138	0.991	0.428	1.442	2.516	2.405
AP	8	23	27.87	MALE	LEAN	RED	4.583	0.75	0.415	1.523	2.714	2.201
BJ	8	18	20.52	MALE	LEAN	RED	1.341	5.3	0.127	0.458	2.467	2.356
BJ	8	18	20.52	MALE	LEAN	RED	1.155	5.515	0.134	0.458	2.358	2.162
AR	8	20	20.66	MALE	LEAN	GREEN	0.274	0.086	0.074	1.451	2.529	0.37
AR	8	20	20.66	MALE	LEAN	GREEN	32.006	9.577	1.047	34.623	43.11	3.902
AF	0	22	27.61	MALE	OBESE	RED	0.677	0.605	0.038	0	1.797	2.856
AF	0	22	27.61	MALE	OBESE	RED	0.62	0.761	0.038	0	1.818	2.198
AA	0	18	21.5	FEMALE	LEAN	RED	2.967	2.117	0.12	0.884	2.01	1.817
AA	0	18	21.5	FEMALE	LEAN	RED	2.682	1.438	0.038	0.719	1.521	1.379
AD	0	32	32.56	MALE	OBESE	GREEN	0.965	1.595	0.159	0.957	2.782	2.125
AD	0	32	32.56	MALE	OBESE	GREEN	1.31	3.057	0.31	4.654	7.047	2.539
AO	0	22	30.51	MALE	OBESE	GREEN	2.054	1.021	0.111	2.289	4.931	1.412
AO	0	22	30.51	MALE	OBESE	GREEN	1.654	0.501	0.069	1.31	3.795	1.322
BC	0	24	28.89	FEMALE	OBESE	RED	1.166	2.273	2.203	2.832	6.742	3.083
BC	0	24	28.89	FEMALE	OBESE	RED	1.482	2.221	2.117	2.978	4.908	2.758
BB	0	31	30.68	FEMALE	OBESE	GREEN	3.195	44.628	0.3	6.977	5.947	1.168
BB	0	31	30.68	FEMALE	OBESE	GREEN	2.796	30.143	0.188	4.675	2.925	1.111
AX	0	22	28.45	MALE	OBESE	GREEN	4.078	8.994	0.41	4.046	3.28	2.353
AX	0	22	28.45	MALE	OBESE	GREEN	4.561	7	0.341	3.784	3.147	2.612
AV	0	26	27.43	FEMALE	OBESE	RED	0.389	2.169	0.065	0.46	3.66	2.093
AV	0	26	27.43	FEMALE	OBESE	RED	0.504	2.169	0.025	0.502	3.369	2.012
AW	0	25	30.95	MALE	OBESE	RED	1.137	0.501	0.021	0.173	2.226	2.028
AW	0	25	30.95	MALE	OBESE	RED	1.023	0.397	0.03	0.132	2.096	1.866
AN	0	28	19.57	MALE	LEAN	RED	1.195	0.501	0.074	0.419	2.183	1.842
AN	0	28	19.57	MALE	LEAN	RED	1.023	0.605	0.065	0.46	2.302	1.744
AU	0	21	21.05	MALE	LEAN	GREEN	18.535	3.738	0.373	13.067	16.92	2.369
AU	0	21	21.05	MALE	LEAN	GREEN	18.282	2.221	0.336	11.396	15.21	1.444
BL	0	23	23.66	MALE	LEAN	RED	2.054	3.633	0.259	14.762	17.274	2.596
BL	0	23	23.66	MALE	LEAN	RED	2.225	4	0.289	14.91	17.502	2.596
AJ	0	23	22.47	MALE	LEAN	GREEN	3.594	6.782	0.279	4.413	2.914	2.49
AJ	0	23	22.47	MALE	LEAN	GREEN	4.078	6.361	0.243	4.486	2.859	2.207
BH	0	27	19.57	FEMALE	LEAN	RED	2.853	6.571	0.213	10.72	20.745	0.876
BH	0	27	19.57	FEMALE	LEAN	RED	2.397	4.367	0.193	7.766	17.375	0.925
AZ	0	21	28.88	FEMALE	OBESE	RED	2.454	3.319	0.383	0.646	2.14	1.996
AZ	0	21	28.88	FEMALE	OBESE	RED	1.854	2.848	0.367	0.502	1.606	1.306
AL	0	29	30.61	FEMALE	OBESE	RED	1.711	2.117	0.193	0.677	3.503	2.296
AL	0	29	30.61	FEMALE	OBESE	RED	1.825	2.064	0.269	0.978	2.903	2.125
AH	0	23	21.4	FEMALE	LEAN	RED	2.511	0.397	0.047	0.543	1.27	2.288
AH	0	23	21.4	FEMALE	LEAN	RED	2.397	0.709	0.092	0.564	1.648	2.645
BA	0	31	20.82	FEMALE	LEAN	GREEN	0.562	1.49	0.038	0.615	4.02	2.596
BA	0	31	20.82	FEMALE	LEAN	GREEN	0.62	1.282	0.038	0.481	3.671	2.158
AI	0	44	34.98	FEMALE	OBESE	GREEN	2.482	2.117	0.193	1.997	3.817	4.317
AI	0	44	34.98	FEMALE	OBESE	GREEN	2.682	1.856	0.259	2.456	3.93	4.243
AG	0	27	30.15	MALE	OBESE	RED	2.397	4.419	0.13	0.667	2.399	1.59
AG	0	27	30.15	MALE	OBESE	RED	2.283	3.738	0.097	0.667	2.204	1.574
BO	0	47	22.28	FEMALE	LEAN	RED	15.23	3.982	0.17	8.91	9.021	2.365
BO	0	47	22.28	FEMALE	LEAN	RED	6.562	2.562	0.177	8.401	7.644	1.988
BV	0	19	24.13	MALE	LEAN	RED	2.462	8.362	0.698	25.282	32.355	1.657
BV	0	19	24.13	MALE	LEAN	RED	3.16	10.035	0.8	27.761	38.886	1.666
BX	0	20	33.75	MALE	OBESE	GREEN	1.249	2.137	0.196	0.682	2.858	2.677
BX	0	20	33.75	MALE	OBESE	GREEN	1.337	2.031	0.19	0.623	2.624	2.099
BP	0	21	20.09	FEMALE	LEAN	GREEN	5.966	5.735	0.183	0.948	2.177	2.08
BP	0	21	20.09	FEMALE	LEAN	GREEN	6.115	5.735	0.19	0.929	2.103	1.814
BM	0	29	21.41	MALE	LEAN	GREEN	3.681	3.211	0.249	0.797	3.073	2.979
BM	0	29	21.41	MALE	LEAN	GREEN	3.254	2.455	0.209	0.74	2.858	2.778
BQ	0	21	33.12	MALE	OBESE	GREEN	1.162	1.109	0.05	2.308	5.543	2.759
BQ	0	21	33.12	MALE	OBESE	GREEN	1.162	1.209	0.05	2.612	5.533	3.034
CD	0	39	32.88	FEMALE	OBESE	GREEN	2.508	4.205	0.417	1.205	2.01	2.337
CD	0	39	32.88	FEMALE	OBESE	GREEN	2.601	4.261	0.359	1.259	2.149	2.594
AB	0	24	23.06	MALE	LEAN	RED	1.293	0.717	0.064	0.583	2.429	2.135
AB	0	24	23.06	MALE	LEAN	RED	1.424	0.389	0.043	0.701	2.494	2.043
CF	0	21	18.69	FEMALE	LEAN	GREEN	3.254	1.616	0.262	4.526	7.217	2.154
CF	0	21	18.69	FEMALE	LEAN	GREEN	2.786	1.719	0.209	4.918	7.288	2.227
CI	0	18	18.64	FEMALE	LEAN	GREEN	3.633	3.871	0.326	1.059	3.572	1.933
CI	0	18	18.64	FEMALE	LEAN	GREEN	3.349	4.429	0.352	0.985	3.875	1.878
CC	0	21	22.82	FEMALE	LEAN	RED	1.78	1.209	0.301	14.178	18.413	3.502
CC	0	21	22.82	FEMALE	LEAN	RED	1.337	1.719	0.43	13.918	17.26	3.749
CR	0	22	29.17	FEMALE	OBESE	GREEN	2.278	3.65	0.262	2.56	4.813	2.255
CR	0	22	29.17	FEMALE	OBESE	GREEN	1.78	3.65	0.249	2.378	4.774	2.135
CO	0	36	30.86	FEMALE	OBESE	GREEN	1.735	0.527	0.124	0.502	2.503	4.024
CO	0	36	30.86	FEMALE	OBESE	GREEN	1.87	0.527	0.117	0.522	2.671	4.015
CJ	0	26	33.7	FEMALE	OBESE	RED	6.862	0.862	0.084	1.223	3.073	4.262
CJ	0	26	33.7	FEMALE	OBESE	RED	8.531	1.009	0.064	1.43	3.458	4.536
BY	0	32	27.1	MALE	OBESE	GREEN	5.669	2.562	0.077	1.403	2.764	2.576
BY	0	32	27.1	MALE	OBESE	GREEN	4.69	2.455	0.036	1.296	2.727	2.383
EU	0	30	27.7	FEMALE	OBESE	RED	21.416	12.896	2.294	4.465	5.289	4.701
EU	0	30	27.7	FEMALE	OBESE	RED	21.746	12.466	2.307	4.622	5.494	4.518
CK	0	20	19.21	FEMALE	LEAN	RED	6.363	2.777	0.275	0.583	1.749	1.593
CK	0	20	19.21	FEMALE	LEAN	RED	6.264	2.939	0.314	0.643	1.87	1.694
AS	0	20	18.69	FEMALE	LEAN	GREEN	3.538	1.719	0.05	0.797	3.477	2.594
AS	0	20	18.69	FEMALE	LEAN	GREEN	4.4	2.137	0.111	0.854	3.78	2.723
CS	0	34	26.88	FEMALE	OBESE	RED	2.74	1.009	0.131	5.496	1.117	2.154
CS	0	34	26.88	FEMALE	OBESE	RED	2.879	1.109	0.117	5.373	1.117	1.988
CW	0	27	20.8	MALE	LEAN	GREEN	5.867	2.242	0.255	0.816	1.627	1.62
CW	0	27	20.8	MALE	LEAN	GREEN	5.916	2.402	0.339	0.75	1.477	1.537
CX	0	21	24.8	MALE	LEAN	GREEN	5.817	2.137	0.008	1.323	2.559	2.576
CX	0	21	24.8	MALE	LEAN	GREEN	4.69	2.402	0	1.16	2.391	2.034
BN	0	22	21.27	FEMALE	LEAN	RED	4.65	2.813	0.813	1.573	3.233	2.892
BN	0	22	21.27	FEMALE	LEAN	RED	3.787	2.119	0.493	1.391	2.833	2.641
CU	0	19	17.92	FEMALE	LEAN	RED	3.883	2.548	0.25	0.476	2.783	2.106
CU	0	19	17.92	FEMALE	LEAN	RED	4.888	2.011	0.216	0.524	3.233	2.892
CV	0	24	23.76	MALE	LEAN	GREEN	2.92	3.866	0.4	14.817	27.863	2.71
CV	0	24	23.76	MALE	LEAN	GREEN	2.63	4.231	0.441	15.723	28.871	2.778
CY	0	22	32.39	FEMALE	OBESE	GREEN	1.26	0	0	0.356	2.017	0.991
CY	0	22	32.39	FEMALE	OBESE	GREEN	2.435	0.216	0.372	0.993	3.561	1.936
DB	0	52	33.11	FEMALE	OBESE	GREEN	16.225	3.289	0.865	3.895	4.248	4.08
DB	0	52	33.11	FEMALE	OBESE	GREEN	16.879	3.183	1.094	3.846	5.331	3.874
DE	0	25	24.48	FEMALE	LEAN	RED	3.306	1.463	0.343	0.476	3.259	1.503
DE	0	25	24.48	FEMALE	LEAN	RED	2.726	1.012	0.169	0.356	2.82	1.23
DI	0	48	33.98	FEMALE	OBESE	RED	3.403	2.334	0.085	0.596	1.847	1.572
DI	0	48	33.98	FEMALE	OBESE	RED	3.499	2.866	0.085	0.62	1.968	1.572
DM	0	18	27.56	FEMALE	OBESE	GREEN	0.962	1.127	0.125	0.356	1.701	3.166
DM	0	18	27.56	FEMALE	OBESE	GREEN	0.912	1.127	0.047	0.284	1.604	2.915
DH	0	28	29.18	FEMALE	OBESE	RED	1.062	0.216	0.085	0.212	2.485	1.685
DH	0	28	29.18	FEMALE	OBESE	RED	1.26	0	0.085	0.14	2.559	1.776
DD	0	19	19.13	FEMALE	LEAN	RED	0.862	0.144	0.158	0.045	2.46	2.664
DD	0	19	19.13	FEMALE	LEAN	RED	0.962	0.414	0.198	0.116	2.783	2.744
DC	0	19	22.59	MALE	LEAN	GREEN	8.067	2.548	0.207	2.956	2.559	2.357
DC	0	19	22.59	MALE	LEAN	GREEN	7.122	2.654	0.267	3.017	2.312	2.505
DK	0	21	27.6	MALE	OBESE	GREEN	12.204	5.062	0.714	5.182	6.746	2.767
DK	0	21	27.6	MALE	OBESE	GREEN	14.544	5.787	0.594	5.649	6.508	2.88
CZ	0	55	22.76	FEMALE	LEAN	RED	3.979	4.335	0.42	11.966	15.279	2.152
CZ	0	55	22.76	FEMALE	LEAN	RED	3.787	4.127	0.434	12.105	14.939	2.14
DF	0	19	19.54	FEMALE	LEAN	GREEN	0.962	2.972	0.085	0.212	2.534	2.664
DF	0	19	19.54	FEMALE	LEAN	GREEN	0.912	2.494	0	0.236	2.559	2.527
DN	0	21	29.28	MALE	OBESE	RED	19.536	4.959	0.761	13.889	15.534	3.531
DN	0	21	29.28	MALE	OBESE	RED	22.75	5.425	1.022	13.306	16.503	5.25
DP	0	22	22.26	MALE	LEAN	RED	6.268	10.545	0.4	1.887	2.522	2.71
DP	0	22	22.26	MALE	LEAN	RED	5.127	11.271	0.125	1.536	2.263	2.618
DQ	0	53	34.38	MALE	OBESE	RED	0.56	0.284	0	0.188	3.284	2.846
DQ	0	53	34.38	MALE	OBESE	RED	0.56	0.78	0.113	0.164	3.133	2.789
DR	0	26	22.37	MALE	LEAN	RED	4.936	2.866	0.085	1.029	2.14	2.47
DR	0	26	22.37	MALE	LEAN	RED	5.032	3.446	0.25	1.271	2.584	2.505
DU	0	21	29.05	FEMALE	OBESE	GREEN	2.823	1.574	0.357	9.432	12.889	2.027
DU	0	21	29.05	FEMALE	OBESE	GREEN	2.92	1.684	0.298	10.37	14.262	1.799
EM	0	62	30.39	MALE	OBESE	RED	2.92	2.011	0	1.633	6.746	2.778
EM	0	62	30.39	MALE	OBESE	RED	2.387	1.296	0	1.186	5.826	2.345
EN	0	55	35.48	MALE	OBESE	GREEN	0.661	0	0	0.728	5.098	4.125
EN	0	55	35.48	MALE	OBESE	GREEN	0.56	0	0	0.692	4.942	4.332
EB	0	54	35.55	MALE	OBESE	RED	1.73556	10.225	0.205027	38.9861	75.6025	5.57103
EB	0	54	35.55	MALE	OBESE	RED	1.47081	10.4991	0.205027	40.4745	79.565	5.86499
EC	0	55	29.56	FEMALE	OBESE	RED	1.38244	1.43176	0.00510622	1.5231	8.32725	5.43915
EC	0	55	29.56	FEMALE	OBESE	RED	1.20549	1.3309	0	1.37437	8.10028	4.61734
EK	0	21	32.72	MALE	OBESE	RED	6.01764	0.534871	0.511163	0.671443	2.06035	4.08524
EK	0	21	32.72	MALE	OBESE	RED	3.75298	0.477364	0.387886	0.466317	2.29927	4.38662
EH	0	20	22	MALE	LEAN	GREEN	1.20549	0	0	0	1.87175	3.45944
EH	0	20	22	MALE	LEAN	GREEN	1.20549	0	0	0	2.07934	3.67898
ED	0	20	20.6	MALE	LEAN	GREEN	2.43939	1.22919	0	0	1.52937	3.07255
ED	0	20	20.6	MALE	LEAN	GREEN	2.70267	1.43176	0	0	1.52025	3.02357
EL	0	23	27.09	MALE	OBESE	GREEN	2.52719	5.47991	0.0383246	0.537866	2.73738	2.32372
EL	0	23	27.09	MALE	OBESE	GREEN	2.43939	5.29658	0	0.580334	3.04466	2.68235
EQ	0	60	32.59	FEMALE	OBESE	RED	2.87801	0.917633	0	0.393506	3.18478	1.22182
EQ	0	60	32.59	FEMALE	OBESE	RED	2.65881	0.810977	0	0.42281	3.18478	1.3072
ET	0	19	28.2	FEMALE	OBESE	RED	3.5782	2.02362	0.0564243	0.466317	1.61182	1.86087
ET	0	19	28.2	FEMALE	OBESE	RED	4.27676	2.16889	0.0656991	0.495066	1.4475	1.71951
EE	0	24	20.57	MALE	LEAN	RED	1.16121	2.31335	0	1.54338	6.73425	3.37474
EE	0	24	20.57	MALE	LEAN	RED	1.20549	2.12056	0	1.53662	5.92248	3.16369
EG	0	21	22.43	MALE	LEAN	GREEN	1.73556	3.02617	0	1.91559	5.51106	3.70738
EG	0	21	22.43	MALE	LEAN	GREEN	1.99984	2.60017	0.0750999	2.28258	3.66092	2.71703
EI	0	23	22.51	MALE	LEAN	RED	4.88688	1.92626	0.0472921	3.27334	3.85576	1.44594
EI	0	23	22.51	MALE	LEAN	RED	8.0123	3.35474	0.133568	4.39939	5.61895	1.95555
ES	0	31	26.45	MALE	OBESE	RED	3.35958	1.22919	0	0.303676	3.05464	3.04455
ES	0	31	26.45	MALE	OBESE	RED	3.92766	1.3309	0	0.341509	3.03468	2.97464
DL	0	51	32.66	MALE	OBESE	RED	0.761643	0.591466	0	0.176238	3.41671	2.47499
DL	0	51	32.66	MALE	OBESE	RED	0.983867	0	0	0	3.59966	2.77258
DG	0	19	17.54	FEMALE	LEAN	RED	8.22873	1.43176	0.10394	0.994644	2.23203	2.26889
DG	0	19	17.54	FEMALE	LEAN	RED	7.62256	0.917633	0.0942299	0.844231	1.98463	2.11861
DS	0	52	29.24	MALE	OBESE	GREEN	5.93075	4.14552	0.648978	3.40561	6.18427	4.0924
DS	0	52	29.24	MALE	OBESE	GREEN	5.84385	4.37664	0.410054	3.8892	7.57017	4.37223
EJ	0	42	29.02	MALE	OBESE	GREEN	1.60325	3.16724	0	0.28063	11.9638	3.516
EJ	0	42	29.02	MALE	OBESE	GREEN	1.55912	2.69524	0	0.249404	12.3699	2.86303
EV	0	45	34.25	MALE	OBESE	RED	1.99984	1.82845	0	2.17363	4.82716	1.18255
EV	0	45	34.25	MALE	OBESE	RED	1.8237	1.82845	0	2.13282	4.96512	1.06531
EY	0	20	33.73	MALE	OBESE	GREEN	9.48273	8.94749	0.522525	11.9861	12.5976	1.7128
EY	0	20	33.73	MALE	OBESE	GREEN	7.7958	8.62839	0.437924	20.4244	25.7343	1.32037
EX	0	22	21.45	MALE	LEAN	RED	2.65881	1.53187	0	0.25727	1.7226	2.50257
EX	0	22	21.45	MALE	LEAN	RED	2.17578	1.53187	0	0.241495	1.52025	2.50257
FA	0	22	20.65	FEMALE	LEAN	RED	1.02824	2.93188	0.0472921	0.123749	4.21801	0.987636
FA	0	22	20.65	FEMALE	LEAN	RED	0.850614	2.69524	0.00510622	0.0752242	3.48771	0.93609
EZ	0	18	22.35	MALE	LEAN	GREEN	6.79897	2.07214	0.123615	0.775417	1.54765	1.23492
EZ	0	18	22.35	MALE	LEAN	GREEN	7.40593	2.02362	0.118666	0.657495	1.64864	1.24804
EO	0	20	20.95	MALE	LEAN	GREEN	1.161	0	0.557	0.116	0.001	0.613
EO	0	20	20.95	MALE	LEAN	GREEN	1.309	0	0.738	0.128	0.04	0.602
DX	0	20	22.7	MALE	LEAN	RED	6.064	4.731	0.883	0.875	1.487	2.239
DX	0	20	22.7	MALE	LEAN	RED	4.583	4.03	0.495	0.697	1.186	2.415
DT	0	21	18.58	FEMALE	LEAN	GREEN	5.323	2.33	0.146	0.523	1.681	1.864
DT	0	21	18.58	FEMALE	LEAN	GREEN	6.249	2.397	0.183	0.747	2.152	2.056
DW	0	19	21.86	FEMALE	LEAN	GREEN	1.572	0.87	0.063	0.256	2.261	1.759
DW	0	19	21.86	FEMALE	LEAN	GREEN	1.433	0.991	0.041	0.196	1.997	1.646
DZ	0	19	21.4	FEMALE	LEAN	GREEN	2.267	4.449	0.258	0.705	3.996	1.199
DZ	0	19	21.4	FEMALE	LEAN	GREEN	2.499	4.449	0.323	0.68	3.904	1.136
EA	0	22	20.12	FEMALE	LEAN	GREEN	2.638	0.991	0.134	0.363	1.408	1.646
EA	0	22	20.12	FEMALE	LEAN	GREEN	2.823	0.991	0.11	0.317	1.521	1.646
AK	0	28	23.86	FEMALE	LEAN	GREEN	1.526	1.616	0.041	0.084	1.868	0.946
AK	0	28	23.86	FEMALE	LEAN	GREEN	1.526	1.873	0.03	0.111	1.938	1.018
BF	0	31	21.42	FEMALE	LEAN	GREEN	5.37	0.404	0.195	4.34	7.587	0.928
BF	0	31	21.42	FEMALE	LEAN	GREEN	4.907	2.529	0.402	7.549	12.868	4.108
AP	0	23	27.87	MALE	LEAN	RED	3.749	1.114	0.509	1.587	3.474	3.13
AP	0	23	27.87	MALE	LEAN	RED	3.379	1.175	0.604	1.716	3.812	3.22
BJ	0	18	20.52	MALE	LEAN	RED	1.989	6.092	0.146	0.507	2.48	2.553
BJ	0	18	20.52	MALE	LEAN	RED	1.804	4.873	0.164	0.491	2.492	2.572
AR	0	20	20.66	MALE	LEAN	GREEN	26.218	10.49	1.316	35.598	48.283	5.005
AR	0	20	20.66	MALE	LEAN	GREEN	26.405	10.033	1.17	37.635	49.096	3.311

## Sheet: Anthropometric
CODE	AGE	BMI	Gender
AU	21	21.05	MALE	LEAN	GREEN
AJ	23	22.47	MALE	LEAN	GREEN
BA	31	20.82	FEMALE	LEAN	GREEN
BP	21	20.09	FEMALE	LEAN	GREEN
BM	29	21.41	MALE	LEAN	GREEN
CF	21	18.69	FEMALE	LEAN	GREEN
CI	18	18.64	FEMALE	LEAN	GREEN
AS	20	18.69	FEMALE	LEAN	GREEN
CW	27	20.8	MALE	LEAN	GREEN
CX	21	24.8	MALE	LEAN	GREEN
CV	24	23.76	MALE	LEAN	GREEN
DC	19	22.59	MALE	LEAN	GREEN
DF	19	19.54	FEMALE	LEAN	GREEN
EH	20	22	MALE	LEAN	GREEN
ED	20	20.6	MALE	LEAN	GREEN
EG	21	22.43	MALE	LEAN	GREEN
EZ	18	22.35	MALE	LEAN	GREEN
EO	20	20.95	MALE	LEAN	GREEN
DT	21	18.58	FEMALE	LEAN	GREEN
DW	19	21.86	FEMALE	LEAN	GREEN
DZ	19	21.4	FEMALE	LEAN	GREEN
EA	22	20.12	FEMALE	LEAN	GREEN
AK	28	23.86	FEMALE	LEAN	GREEN
BF	31	21.42	FEMALE	LEAN	GREEN
AR	20	20.66	MALE	LEAN	GREEN
AA	18	21.5	FEMALE	LEAN	RED
AN	28	19.57	MALE	LEAN	RED
BL	23	23.66	MALE	LEAN	RED
BH	27	19.57	FEMALE	LEAN	RED
AH	23	21.4	FEMALE	LEAN	RED
BO	47	22.28	FEMALE	LEAN	RED
BV	19	24.13	MALE	LEAN	RED
AB	24	23.06	MALE	LEAN	RED
CC	21	22.82	FEMALE	LEAN	RED
CK	20	19.21	FEMALE	LEAN	RED
BN	22	21.27	FEMALE	LEAN	RED
CU	19	17.92	FEMALE	LEAN	RED
DE	25	24.48	FEMALE	LEAN	RED
DD	19	19.13	FEMALE	LEAN	RED
CZ	55	22.76	FEMALE	LEAN	RED
DP	22	22.26	MALE	LEAN	RED
DR	26	22.37	MALE	LEAN	RED
EE	24	20.57	MALE	LEAN	RED
EI	23	22.51	MALE	LEAN	RED
DG	19	17.54	FEMALE	LEAN	RED
EX	22	21.45	MALE	LEAN	RED
FA	22	20.65	FEMALE	LEAN	RED
DX	20	22.7	MALE	LEAN	RED
AP	23	27.87	MALE	LEAN	RED
BJ	18	20.52	MALE	LEAN	RED
AD	32	32.56	MALE	OBESE	GREEN
AO	22	30.51	MALE	OBESE	GREEN
BB	31	30.68	FEMALE	OBESE	GREEN
AX	22	28.45	MALE	OBESE	GREEN
AI	44	34.98	FEMALE	OBESE	GREEN
BX	20	33.75	MALE	OBESE	GREEN
BQ	21	33.12	MALE	OBESE	GREEN
CD	39	32.88	FEMALE	OBESE	GREEN
CR	22	29.17	FEMALE	OBESE	GREEN
CO	36	30.86	FEMALE	OBESE	GREEN
BY	32	27.1	MALE	OBESE	GREEN
CY	22	32.39	FEMALE	OBESE	GREEN
DB	52	33.11	FEMALE	OBESE	GREEN
DM	18	27.56	FEMALE	OBESE	GREEN
DK	21	27.6	MALE	OBESE	GREEN
DU	21	29.05	FEMALE	OBESE	GREEN
EN	55	35.48	MALE	OBESE	GREEN
EL	23	27.09	MALE	OBESE	GREEN
DS	52	29.24	MALE	OBESE	GREEN
EJ	42	29.02	MALE	OBESE	GREEN
EY	20	33.73	MALE	OBESE	GREEN
AF	22	27.61	MALE	OBESE	RED
BC	24	28.89	FEMALE	OBESE	RED
AV	26	27.43	FEMALE	OBESE	RED
AW	25	30.95	MALE	OBESE	RED
AZ	21	28.88	FEMALE	OBESE	RED
AL	29	30.61	FEMALE	OBESE	RED
AG	27	30.15	MALE	OBESE	RED
CJ	26	33.7	FEMALE	OBESE	RED
EU	30	27.7	FEMALE	OBESE	RED
CS	34	26.88	FEMALE	OBESE	RED
DI	48	33.98	FEMALE	OBESE	RED
DH	28	29.18	FEMALE	OBESE	RED
DN	21	29.28	MALE	OBESE	RED
DQ	53	34.38	MALE	OBESE	RED
EM	62	30.39	MALE	OBESE	RED
EB	54	35.55	MALE	OBESE	RED
EC	55	29.56	FEMALE	OBESE	RED
EK	21	32.72	MALE	OBESE	RED
EQ	60	32.59	FEMALE	OBESE	RED
ET	19	28.2	FEMALE	OBESE	RED
ES	31	26.45	MALE	OBESE	RED
DL	51	32.66	MALE	OBESE	RED
EV	45	34.25	MALE	OBESE	RED

## Sheet: Data
SUBJECT ID	TIME	AGE	BMI	GENDER	BMI RANGE	TREATMENT	IFNy	IL-10	IL-1b	IL-6	IL-8	TNFa
DT	0	21	18.58	FEMALE	LEAN	GREEN	5.323	2.33	0.146	0.523	1.681	1.864
DT	0	21	18.58	FEMALE	LEAN	GREEN	6.249	2.397	0.183	0.747	2.152	2.056
CI	0	18	18.64	FEMALE	LEAN	GREEN	3.633	3.871	0.326	1.059	3.572	1.933
CI	0	18	18.64	FEMALE	LEAN	GREEN	3.349	4.429	0.352	0.985	3.875	1.878
CF	0	21	18.69	FEMALE	LEAN	GREEN	3.254	1.616	0.262	4.526	7.217	2.154
CF	0	21	18.69	FEMALE	LEAN	GREEN	2.786	1.719	0.209	4.918	7.288	2.227
AS	0	20	18.69	FEMALE	LEAN	GREEN	3.538	1.719	0.05	0.797	3.477	2.594
AS	0	20	18.69	FEMALE	LEAN	GREEN	4.4	2.137	0.111	0.854	3.78	2.723
DF	0	19	19.54	FEMALE	LEAN	GREEN	0.962	2.972	0.085	0.212	2.534	2.664
DF	0	19	19.54	FEMALE	LEAN	GREEN	0.912	2.494	0	0.236	2.559	2.527
BP	0	21	20.09	FEMALE	LEAN	GREEN	5.966	5.735	0.183	0.948	2.177	2.08
BP	0	21	20.09	FEMALE	LEAN	GREEN	6.115	5.735	0.19	0.929	2.103	1.814
EA	0	22	20.12	FEMALE	LEAN	GREEN	2.638	0.991	0.134	0.363	1.408	1.646
EA	0	22	20.12	FEMALE	LEAN	GREEN	2.823	0.991	0.11	0.317	1.521	1.646
ED	0	20	20.6	MALE	LEAN	GREEN	2.43939	1.22919	0	0	1.52937	3.07255
ED	0	20	20.6	MALE	LEAN	GREEN	2.70267	1.43176	0	0	1.52025	3.02357
AR	0	20	20.66	MALE	LEAN	GREEN	26.218	10.49	1.316	35.598	48.283	5.005
AR	0	20	20.66	MALE	LEAN	GREEN	26.405	10.033	1.17	37.635	49.096	3.311
CW	0	27	20.8	MALE	LEAN	GREEN	5.867	2.242	0.255	0.816	1.627	1.62
CW	0	27	20.8	MALE	LEAN	GREEN	5.916	2.402	0.339	0.75	1.477	1.537
BA	0	31	20.82	FEMALE	LEAN	GREEN	0.562	1.49	0.038	0.615	4.02	2.596
BA	0	31	20.82	FEMALE	LEAN	GREEN	0.62	1.282	0.038	0.481	3.671	2.158
EO	0	20	20.95	MALE	LEAN	GREEN	1.161	0	0.557	0.116	0.001	0.613
EO	0	20	20.95	MALE	LEAN	GREEN	1.309	0	0.738	0.128	0.04	0.602
AU	0	21	21.05	MALE	LEAN	GREEN	18.535	3.738	0.373	13.067	16.92	2.369
AU	0	21	21.05	MALE	LEAN	GREEN	18.282	2.221	0.336	11.396	15.21	1.444
DZ	0	19	21.4	FEMALE	LEAN	GREEN	2.267	4.449	0.258	0.705	3.996	1.199
DZ	0	19	21.4	FEMALE	LEAN	GREEN	2.499	4.449	0.323	0.68	3.904	1.136
BM	0	29	21.41	MALE	LEAN	GREEN	3.681	3.211	0.249	0.797	3.073	2.979
BM	0	29	21.41	MALE	LEAN	GREEN	3.254	2.455	0.209	0.74	2.858	2.778
BF	0	31	21.42	FEMALE	LEAN	GREEN	5.37	0.404	0.195	4.34	7.587	0.928
BF	0	31	21.42	FEMALE	LEAN	GREEN	4.907	2.529	0.402	7.549	12.868	4.108
DW	0	19	21.86	FEMALE	LEAN	GREEN	1.572	0.87	0.063	0.256	2.261	1.759
DW	0	19	21.86	FEMALE	LEAN	GREEN	1.433	0.991	0.041	0.196	1.997	1.646
EH	0	20	22	MALE	LEAN	GREEN	1.20549	0	0	0	1.87175	3.45944
EH	0	20	22	MALE	LEAN	GREEN	1.20549	0	0	0	2.07934	3.67898
EZ	0	18	22.35	MALE	LEAN	GREEN	6.79897	2.07214	0.123615	0.775417	1.54765	1.23492
EZ	0	18	22.35	MALE	LEAN	GREEN	7.40593	2.02362	0.118666	0.657495	1.64864	1.24804
EG	0	21	22.43	MALE	LEAN	GREEN	1.73556	3.02617	0	1.91559	5.51106	3.70738
EG	0	21	22.43	MALE	LEAN	GREEN	1.99984	2.60017	0.0750999	2.28258	3.66092	2.71703
AJ	0	23	22.47	MALE	LEAN	GREEN	3.594	6.782	0.279	4.413	2.914	2.49
AJ	0	23	22.47	MALE	LEAN	GREEN	4.078	6.361	0.243	4.486	2.859	2.207
DC	0	19	22.59	MALE	LEAN	GREEN	8.067	2.548	0.207	2.956	2.559	2.357
DC	0	19	22.59	MALE	LEAN	GREEN	7.122	2.654	0.267	3.017	2.312	2.505
CV	0	24	23.76	MALE	LEAN	GREEN	2.92	3.866	0.4	14.817	27.863	2.71
CV	0	24	23.76	MALE	LEAN	GREEN	2.63	4.231	0.441	15.723	28.871	2.778
AK	0	28	23.86	FEMALE	LEAN	GREEN	1.526	1.616	0.041	0.084	1.868	0.946
AK	0	28	23.86	FEMALE	LEAN	GREEN	1.526	1.873	0.03	0.111	1.938	1.018
CX	0	21	24.8	MALE	LEAN	GREEN	5.817	2.137	0.008	1.323	2.559	2.576
CX	0	21	24.8	MALE	LEAN	GREEN	4.69	2.402	0	1.16	2.391	2.034
DG	0	19	17.54	FEMALE	LEAN	RED	8.22873	1.43176	0.10394	0.994644	2.23203	2.26889
DG	0	19	17.54	FEMALE	LEAN	RED	7.62256	0.917633	0.0942299	0.844231	1.98463	2.11861
CU	0	19	17.92	FEMALE	LEAN	RED	3.883	2.548	0.25	0.476	2.783	2.106
CU	0	19	17.92	FEMALE	LEAN	RED	4.888	2.011	0.216	0.524	3.233	2.892
DD	0	19	19.13	FEMALE	LEAN	RED	0.862	0.144	0.158	0.045	2.46	2.664
DD	0	19	19.13	FEMALE	LEAN	RED	0.962	0.414	0.198	0.116	2.783	2.744
CK	0	20	19.21	FEMALE	LEAN	RED	6.363	2.777	0.275	0.583	1.749	1.593
CK	0	20	19.21	FEMALE	LEAN	RED	6.264	2.939	0.314	0.643	1.87	1.694
AN	0	28	19.57	MALE	LEAN	RED	1.195	0.501	0.074	0.419	2.183	1.842
AN	0	28	19.57	MALE	LEAN	RED	1.023	0.605	0.065	0.46	2.302	1.744
BH	0	27	19.57	FEMALE	LEAN	RED	2.853	6.571	0.213	10.72	20.745	0.876
BH	0	27	19.57	FEMALE	LEAN	RED	2.397	4.367	0.193	7.766	17.375	0.925
BJ	0	18	20.52	MALE	LEAN	RED	1.989	6.092	0.146	0.507	2.48	2.553
BJ	0	18	20.52	MALE	LEAN	RED	1.804	4.873	0.164	0.491	2.492	2.572
EE	0	24	20.57	MALE	LEAN	RED	1.16121	2.31335	0	1.54338	6.73425	3.37474
EE	0	24	20.57	MALE	LEAN	RED	1.20549	2.12056	0	1.53662	5.92248	3.16369
FA	0	22	20.65	FEMALE	LEAN	RED	1.02824	2.93188	0.0472921	0.123749	4.21801	0.987636
FA	0	22	20.65	FEMALE	LEAN	RED	0.850614	2.69524	0.00510622	0.0752242	3.48771	0.93609
BN	0	22	21.27	FEMALE	LEAN	RED	4.65	2.813	0.813	1.573	3.233	2.892
BN	0	22	21.27	FEMALE	LEAN	RED	3.787	2.119	0.493	1.391	2.833	2.641
AH	0	23	21.4	FEMALE	LEAN	RED	2.511	0.397	0.047	0.543	1.27	2.288
AH	0	23	21.4	FEMALE	LEAN	RED	2.397	0.709	0.092	0.564	1.648	2.645
EX	0	22	21.45	MALE	LEAN	RED	2.65881	1.53187	0	0.25727	1.7226	2.50257
EX	0	22	21.45	MALE	LEAN	RED	2.17578	1.53187	0	0.241495	1.52025	2.50257
AA	0	18	21.5	FEMALE	LEAN	RED	2.967	2.117	0.12	0.884	2.01	1.817
AA	0	18	21.5	FEMALE	LEAN	RED	2.682	1.438	0.038	0.719	1.521	1.379
DP	0	22	22.26	MALE	LEAN	RED	6.268	10.545	0.4	1.887	2.522	2.71
DP	0	22	22.26	MALE	LEAN	RED	5.127	11.271	0.125	1.536	2.263	2.618
BO	0	47	22.28	FEMALE	LEAN	RED	15.23	3.982	0.17	8.91	9.021	2.365
BO	0	47	22.28	FEMALE	LEAN	RED	6.562	2.562	0.177	8.401	7.644	1.988
DR	0	26	22.37	MALE	LEAN	RED	4.936	2.866	0.085	1.029	2.14	2.47
DR	0	26	22.37	MALE	LEAN	RED	5.032	3.446	0.25	1.271	2.584	2.505
EI	0	23	22.51	MALE	LEAN	RED	4.88688	1.92626	0.0472921	3.27334	3.85576	1.44594
EI	0	23	22.51	MALE	LEAN	RED	8.0123	3.35474	0.133568	4.39939	5.61895	1.95555
DX	0	20	22.7	MALE	LEAN	RED	6.064	4.731	0.883	0.875	1.487	2.239
DX	0	20	22.7	MALE	LEAN	RED	4.583	4.03	0.495	0.697	1.186	2.415
CZ	0	55	22.76	FEMALE	LEAN	RED	3.979	4.335	0.42	11.966	15.279	2.152
CZ	0	55	22.76	FEMALE	LEAN	RED	3.787	4.127	0.434	12.105	14.939	2.14
CC	0	21	22.82	FEMALE	LEAN	RED	1.78	1.209	0.301	14.178	18.413	3.502
CC	0	21	22.82	FEMALE	LEAN	RED	1.337	1.719	0.43	13.918	17.26	3.749
AB	0	24	23.06	MALE	LEAN	RED	1.293	0.717	0.064	0.583	2.429	2.135
AB	0	24	23.06	MALE	LEAN	RED	1.424	0.389	0.043	0.701	2.494	2.043
BL	0	23	23.66	MALE	LEAN	RED	2.054	3.633	0.259	14.762	17.274	2.596
BL	0	23	23.66	MALE	LEAN	RED	2.225	4	0.289	14.91	17.502	2.596
BV	0	19	24.13	MALE	LEAN	RED	2.462	8.362	0.698	25.282	32.355	1.657
BV	0	19	24.13	MALE	LEAN	RED	3.16	10.035	0.8	27.761	38.886	1.666
DE	0	25	24.48	FEMALE	LEAN	RED	3.306	1.463	0.343	0.476	3.259	1.503
DE	0	25	24.48	FEMALE	LEAN	RED	2.726	1.012	0.169	0.356	2.82	1.23
AP	0	23	27.87	MALE	LEAN	RED	3.749	1.114	0.509	1.587	3.474	3.13
AP	0	23	27.87	MALE	LEAN	RED	3.379	1.175	0.604	1.716	3.812	3.22
EL	0	23	27.09	MALE	OBESE	GREEN	2.52719	5.47991	0.0383246	0.537866	2.73738	2.32372
EL	0	23	27.09	MALE	OBESE	GREEN	2.43939	5.29658	0	0.580334	3.04466	2.68235
BY	0	32	27.1	MALE	OBESE	GREEN	5.669	2.562	0.077	1.403	2.764	2.576
BY	0	32	27.1	MALE	OBESE	GREEN	4.69	2.455	0.036	1.296	2.727	2.383
DM	0	18	27.56	FEMALE	OBESE	GREEN	0.962	1.127	0.125	0.356	1.701	3.166
DM	0	18	27.56	FEMALE	OBESE	GREEN	0.912	1.127	0.047	0.284	1.604	2.915
DK	0	21	27.6	MALE	OBESE	GREEN	12.204	5.062	0.714	5.182	6.746	2.767
DK	0	21	27.6	MALE	OBESE	GREEN	14.544	5.787	0.594	5.649	6.508	2.88
AX	0	22	28.45	MALE	OBESE	GREEN	4.078	8.994	0.41	4.046	3.28	2.353
AX	0	22	28.45	MALE	OBESE	GREEN	4.561	7	0.341	3.784	3.147	2.612
EJ	0	42	29.02	MALE	OBESE	GREEN	1.60325	3.16724	0	0.28063	11.9638	3.516
EJ	0	42	29.02	MALE	OBESE	GREEN	1.55912	2.69524	0	0.249404	12.3699	2.86303
DU	0	21	29.05	FEMALE	OBESE	GREEN	2.823	1.574	0.357	9.432	12.889	2.027
DU	0	21	29.05	FEMALE	OBESE	GREEN	2.92	1.684	0.298	10.37	14.262	1.799
CR	0	22	29.17	FEMALE	OBESE	GREEN	2.278	3.65	0.262	2.56	4.813	2.255
CR	0	22	29.17	FEMALE	OBESE	GREEN	1.78	3.65	0.249	2.378	4.774	2.135
DS	0	52	29.24	MALE	OBESE	GREEN	5.93075	4.14552	0.648978	3.40561	6.18427	4.0924
DS	0	52	29.24	MALE	OBESE	GREEN	5.84385	4.37664	0.410054	3.8892	7.57017	4.37223
AO	0	22	30.51	MALE	OBESE	GREEN	2.054	1.021	0.111	2.289	4.931	1.412
AO	0	22	30.51	MALE	OBESE	GREEN	1.654	0.501	0.069	1.31	3.795	1.322
BB	0	31	30.68	FEMALE	OBESE	GREEN	3.195	44.628	0.3	6.977	5.947	1.168
BB	0	31	30.68	FEMALE	OBESE	GREEN	2.796	30.143	0.188	4.675	2.925	1.111
CO	0	36	30.86	FEMALE	OBESE	GREEN	1.735	0.527	0.124	0.502	2.503	4.024
CO	0	36	30.86	FEMALE	OBESE	GREEN	1.87	0.527	0.117	0.522	2.671	4.015
CY	0	22	32.39	FEMALE	OBESE	GREEN	1.26	0	0	0.356	2.017	0.991
CY	0	22	32.39	FEMALE	OBESE	GREEN	2.435	0.216	0.372	0.993	3.561	1.936
AD	0	32	32.56	MALE	OBESE	GREEN	0.965	1.595	0.159	0.957	2.782	2.125
AD	0	32	32.56	MALE	OBESE	GREEN	1.31	3.057	0.31	4.654	7.047	2.539
CD	0	39	32.88	FEMALE	OBESE	GREEN	2.508	4.205	0.417	1.205	2.01	2.337
CD	0	39	32.88	FEMALE	OBESE	GREEN	2.601	4.261	0.359	1.259	2.149	2.594
DB	0	52	33.11	FEMALE	OBESE	GREEN	16.225	3.289	0.865	3.895	4.248	4.08
DB	0	52	33.11	FEMALE	OBESE	GREEN	16.879	3.183	1.094	3.846	5.331	3.874
BQ	0	21	33.12	MALE	OBESE	GREEN	1.162	1.109	0.05	2.308	5.543	2.759
BQ	0	21	33.12	MALE	OBESE	GREEN	1.162	1.209	0.05	2.612	5.533	3.034
EY	0	20	33.73	MALE	OBESE	GREEN	9.48273	8.94749	0.522525	11.9861	12.5976	1.7128
EY	0	20	33.73	MALE	OBESE	GREEN	7.7958	8.62839	0.437924	20.4244	25.7343	1.32037
BX	0	20	33.75	MALE	OBESE	GREEN	1.249	2.137	0.196	0.682	2.858	2.677
BX	0	20	33.75	MALE	OBESE	GREEN	1.337	2.031	0.19	0.623	2.624	2.099
AI	0	44	34.98	FEMALE	OBESE	GREEN	2.482	2.117	0.193	1.997	3.817	4.317
AI	0	44	34.98	FEMALE	OBESE	GREEN	2.682	1.856	0.259	2.456	3.93	4.243
EN	0	55	35.48	MALE	OBESE	GREEN	0.661	0	0	0.728	5.098	4.125
EN	0	55	35.48	MALE	OBESE	GREEN	0.56	0	0	0.692	4.942	4.332
ES	0	31	26.45	MALE	OBESE	RED	3.35958	1.22919	0	0.303676	3.05464	3.04455
ES	0	31	26.45	MALE	OBESE	RED	3.92766	1.3309	0	0.341509	3.03468	2.97464
CS	0	34	26.88	FEMALE	OBESE	RED	2.74	1.009	0.131	5.496	1.117	2.154
CS	0	34	26.88	FEMALE	OBESE	RED	2.879	1.109	0.117	5.373	1.117	1.988
AV	0	26	27.43	FEMALE	OBESE	RED	0.389	2.169	0.065	0.46	3.66	2.093
AV	0	26	27.43	FEMALE	OBESE	RED	0.504	2.169	0.025	0.502	3.369	2.012
AF	0	22	27.61	MALE	OBESE	RED	0.677	0.605	0.038	0	1.797	2.856
AF	0	22	27.61	MALE	OBESE	RED	0.62	0.761	0.038	0	1.818	2.198
EU	0	30	27.7	FEMALE	OBESE	RED	21.416	12.896	2.294	4.465	5.289	4.701
EU	0	30	27.7	FEMALE	OBESE	RED	21.746	12.466	2.307	4.622	5.494	4.518
ET	0	19	28.2	FEMALE	OBESE	RED	3.5782	2.02362	0.0564243	0.466317	1.61182	1.86087
ET	0	19	28.2	FEMALE	OBESE	RED	4.27676	2.16889	0.0656991	0.495066	1.4475	1.71951
AZ	0	21	28.88	FEMALE	OBESE	RED	2.454	3.319	0.383	0.646	2.14	1.996
AZ	0	21	28.88	FEMALE	OBESE	RED	1.854	2.848	0.367	0.502	1.606	1.306
BC	0	24	28.89	FEMALE	OBESE	RED	1.166	2.273	2.203	2.832	6.742	3.083
BC	0	24	28.89	FEMALE	OBESE	RED	1.482	2.221	2.117	2.978	4.908	2.758
DH	0	28	29.18	FEMALE	OBESE	RED	1.062	0.216	0.085	0.212	2.485	1.685
DH	0	28	29.18	FEMALE	OBESE	RED	1.26	0	0.085	0.14	2.559	1.776
DN	0	21	29.28	MALE	OBESE	RED	19.536	4.959	0.761	13.889	15.534	3.531
DN	0	21	29.28	MALE	OBESE	RED	22.75	5.425	1.022	13.306	16.503	5.25
EC	0	55	29.56	FEMALE	OBESE	RED	1.38244	1.43176	0.00510622	1.5231	8.32725	5.43915
EC	0	55	29.56	FEMALE	OBESE	RED	1.20549	1.3309	0	1.37437	8.10028	4.61734
AG	0	27	30.15	MALE	OBESE	RED	2.397	4.419	0.13	0.667	2.399	1.59
AG	0	27	30.15	MALE	OBESE	RED	2.283	3.738	0.097	0.667	2.204	1.574
EM	0	62	30.39	MALE	OBESE	RED	2.92	2.011	0	1.633	6.746	2.778
EM	0	62	30.39	MALE	OBESE	RED	2.387	1.296	0	1.186	5.826	2.345
AL	0	29	30.61	FEMALE	OBESE	RED	1.711	2.117	0.193	0.677	3.503	2.296
AL	0	29	30.61	FEMALE	OBESE	RED	1.825	2.064	0.269	0.978	2.903	2.125
AW	0	25	30.95	MALE	OBESE	RED	1.137	0.501	0.021	0.173	2.226	2.028
AW	0	25	30.95	MALE	OBESE	RED	1.023	0.397	0.03	0.132	2.096	1.866
EQ	0	60	32.59	FEMALE	OBESE	RED	2.87801	0.917633	0	0.393506	3.18478	1.22182
EQ	0	60	32.59	FEMALE	OBESE	RED	2.65881	0.810977	0	0.42281	3.18478	1.3072
DL	0	51	32.66	MALE	OBESE	RED	0.761643	0.591466	0	0.176238	3.41671	2.47499
DL	0	51	32.66	MALE	OBESE	RED	0.983867	0	0	0	3.59966	2.77258
EK	0	21	32.72	MALE	OBESE	RED	6.01764	0.534871	0.511163	0.671443	2.06035	4.08524
EK	0	21	32.72	MALE	OBESE	RED	3.75298	0.477364	0.387886	0.466317	2.29927	4.38662
CJ	0	26	33.7	FEMALE	OBESE	RED	6.862	0.862	0.084	1.223	3.073	4.262
CJ	0	26	33.7	FEMALE	OBESE	RED	8.531	1.009	0.064	1.43	3.458	4.536
DI	0	48	33.98	FEMALE	OBESE	RED	3.403	2.334	0.085	0.596	1.847	1.572
DI	0	48	33.98	FEMALE	OBESE	RED	3.499	2.866	0.085	0.62	1.968	1.572
EV	0	45	34.25	MALE	OBESE	RED	1.99984	1.82845	0	2.17363	4.82716	1.18255
EV	0	45	34.25	MALE	OBESE	RED	1.8237	1.82845	0	2.13282	4.96512	1.06531
DQ	0	53	34.38	MALE	OBESE	RED	0.56	0.284	0	0.188	3.284	2.846
DQ	0	53	34.38	MALE	OBESE	RED	0.56	0.78	0.113	0.164	3.133	2.789
EB	0	54	35.55	MALE	OBESE	RED	1.73556	10.225	0.205027	38.9861	75.6025	5.57103
EB	0	54	35.55	MALE	OBESE	RED	1.47081	10.4991	0.205027	40.4745	79.565	5.86499
DT	8	21	18.58	FEMALE	LEAN	GREEN	5.601	2.264	0.29	0.961	1.938	1.912
DT	8	21	18.58	FEMALE	LEAN	GREEN	3.934	2.002	0.208	0.663	1.589	1.589
CI	8	18	18.64	FEMALE	LEAN	GREEN	3.066	4.317	0.275	0.967	1.963	1.676
CI	8	18	18.64	FEMALE	LEAN	GREEN	2.693	3.595	0.196	0.929	2.168	1.657
CF	8	21	18.69	FEMALE	LEAN	GREEN	2.786	1.513	0.144	3.477	4.832	1.924
CF	8	21	18.69	FEMALE	LEAN	GREEN	3.066	1.309	0.177	3.477	5.494	1.694
AS	8	20	18.69	FEMALE	LEAN	GREEN	4.111	3.485	0.05	1.068	2.989	2.356
AS	8	20	18.69	FEMALE	LEAN	GREEN	4.111	3.65	0.077	1.096	2.858	2.631
DF	8	19	19.54	FEMALE	LEAN	GREEN	1.062	3.289	0.198	0.164	3.764	2.493
DF	8	19	19.54	FEMALE	LEAN	GREEN	1.062	3.236	0.113	0.188	3.688	2.436
BP	8	21	20.09	FEMALE	LEAN	GREEN	6.963	7.535	0.209	1.059	2.41	1.814
BP	8	21	20.09	FEMALE	LEAN	GREEN	6.463	6.834	0.183	1.151	2.261	2.264
EA	8	22	20.12	FEMALE	LEAN	GREEN	3.425	0.991	0.086	0.271	1.521	1.921
EA	8	22	20.12	FEMALE	LEAN	GREEN	3.749	1.616	0.11	0.356	1.821	2.249
ED	8	20	20.6	MALE	LEAN	GREEN	2.70267	1.28016	0	0.0855022	1.51113	2.8909
ED	8	20	20.6	MALE	LEAN	GREEN	2.57107	1.12652	0	0.0855022	1.61182	2.55088
AR	8	20	20.66	MALE	LEAN	GREEN	0.274	0.086	0.074	1.451	2.529	0.37
AR	8	20	20.66	MALE	LEAN	GREEN	32.006	9.577	1.047	34.623	43.11	3.902
CW	8	27	20.8	MALE	LEAN	GREEN	4.015	1.719	0.17	0.643	1.345	1.399
CW	8	27	20.8	MALE	LEAN	GREEN	5.178	1.771	0.249	0.759	1.627	1.712
BA	8	31	20.82	FEMALE	LEAN	GREEN	0.677	1.647	0.013	0.44	1.616	2.328
BA	8	31	20.82	FEMALE	LEAN	GREEN	0.677	1.438	0.021	0.275	1.521	1.768
EO	8	20	20.95	MALE	LEAN	GREEN	12.2436	4.92934	1.02951	1.94271	7.20081	1.26117
EO	8	20	20.95	MALE	LEAN	GREEN	13.1047	5.84609	1.21311	2.06487	8.12294	1.49905
AU	8	21	21.05	MALE	LEAN	GREEN	7.482	3.319	0.259	10.593	16.567	1.541
AU	8	21	21.05	MALE	LEAN	GREEN	6.405	2.796	0.289	10.435	16.971	1.493
DZ	8	19	21.4	FEMALE	LEAN	GREEN	2.082	4.309	0.22	0.739	4.61	0.982
DZ	8	19	21.4	FEMALE	LEAN	GREEN	1.989	4.449	0.284	0.858	5.318	1.163
BM	8	29	21.41	MALE	LEAN	GREEN	3.919	2.831	0.209	0.682	2.867	2.374
BM	8	29	21.41	MALE	LEAN	GREEN	4.497	3.102	0.203	0.682	2.97	2.503
BF	8	31	21.42	FEMALE	LEAN	GREEN	24.587	4.309	0.495	19.733	50.271	2.405
BF	8	31	21.42	FEMALE	LEAN	GREEN	17.796	2.864	0.455	13.615	29.038	2.73
DW	8	19	21.86	FEMALE	LEAN	GREEN	1.341	0.633	0.063	0.084	2.116	1.486
DW	8	19	21.86	FEMALE	LEAN	GREEN	1.341	0.991	0.069	0.125	1.962	1.57
EH	8	20	22	MALE	LEAN	GREEN	1.11691	0.358829	0	0.363916	2.59025	4.78373
EH	8	20	22	MALE	LEAN	GREEN	1.33823	0.702418	0	0.408191	2.68822	4.84171
EZ	8	18	22.35	MALE	LEAN	GREEN	6.45185	1.4819	0.0750999	0.622522	1.55679	1.16948
EZ	8	18	22.35	MALE	LEAN	GREEN	6.88572	1.53187	0.0942299	0.63653	1.48382	1.19563
EG	8	21	22.43	MALE	LEAN	GREEN	17.1439	9.12987	1.53769	3.83286	7.40198	3.84252
EG	8	21	22.43	MALE	LEAN	GREEN	18.4304	10.9563	1.67717	4.00914	7.60387	4.00659
AJ	8	23	22.47	MALE	LEAN	GREEN	4.277	7.676	0.259	2.832	2.356	2.823
AJ	8	23	22.47	MALE	LEAN	GREEN	3.338	4.996	0.228	3.878	2.465	2.71
DC	8	19	22.59	MALE	LEAN	GREEN	9.198	3.918	0.169	3.895	3.133	2.903
DC	8	19	22.59	MALE	LEAN	GREEN	11.876	3.499	0.372	4.752	3.828	3.188
CV	8	24	23.76	MALE	LEAN	GREEN	2.92	3.761	0.225	13.458	26.118	2.14
CV	8	24	23.76	MALE	LEAN	GREEN	2.387	4.022	0.233	9.957	20.731	2.049
AK	8	28	23.86	FEMALE	LEAN	GREEN	1.248	0.75	0.098	0.084	1.33	1.036
AK	8	28	23.86	FEMALE	LEAN	GREEN	1.155	0.633	0.052	0.071	1.099	0.955
CX	8	21	24.8	MALE	LEAN	GREEN	5.867	3.211	0.064	1.457	2.662	2.704
CX	8	21	24.8	MALE	LEAN	GREEN	7.163	3.65	0.111	1.775	3.195	2.759
DG	8	19	17.54	FEMALE	LEAN	RED	5.93075	1.12652	0.0703847	0.63653	2.28965	1.88113
DG	8	19	17.54	FEMALE	LEAN	RED	6.36504	1.63131	0.0656991	0.796097	2.63918	2.26889
CU	8	19	17.92	FEMALE	LEAN	RED	4.936	5.322	0.148	0.752	3.764	2.778
CU	8	19	17.92	FEMALE	LEAN	RED	5.508	4.855	0.148	0.644	3.789	2.869
DD	8	19	19.13	FEMALE	LEAN	RED	0.862	0.284	0.267	0.164	2.46	2.892
DD	8	19	19.13	FEMALE	LEAN	RED	0.762	0	0.169	0.092	1.968	2.88
CK	8	20	19.21	FEMALE	LEAN	RED	6.463	2.562	0.294	0.662	1.972	1.768
CK	8	20	19.21	FEMALE	LEAN	RED	6.562	2.508	0.236	0.603	1.926	1.694
AN	8	28	19.57	MALE	LEAN	RED	0.908	1.543	0.074	0.44	2.399	1.493
AN	8	28	19.57	MALE	LEAN	RED	0.908	0.605	0.087	0.522	2.226	1.647
BH	8	27	19.57	FEMALE	LEAN	RED	3.85	4.786	0.269	12.559	22.449	1.014
BH	8	27	19.57	FEMALE	LEAN	RED	3.651	5.206	0.336	12.591	23.435	1.103
BJ	8	18	20.52	MALE	LEAN	RED	1.341	5.3	0.127	0.458	2.467	2.356
BJ	8	18	20.52	MALE	LEAN	RED	1.155	5.515	0.134	0.458	2.358	2.162
EE	8	24	20.57	MALE	LEAN	RED	1.11691	2.40925	0	1.78011	7.04484	3.37474
EE	8	24	20.57	MALE	LEAN	RED	1.20549	3.02617	0	2.16683	7.42438	3.38179
FA	8	22	20.65	FEMALE	LEAN	RED	1.02824	2.97905	0.0472921	0.241495	3.01474	0.83998
FA	8	22	20.65	FEMALE	LEAN	RED	1.02824	3.07324	0.123615	0.25727	2.77679	0.878337
BN	8	22	21.27	FEMALE	LEAN	RED	6.174	4.127	0.726	1.754	2.596	2.732
BN	8	22	21.27	FEMALE	LEAN	RED	5.936	4.127	0.673	1.609	2.485	2.664
AH	8	23	21.4	FEMALE	LEAN	RED	2.311	1.23	0.125	0.595	1.333	2.109
AH	8	23	21.4	FEMALE	LEAN	RED	2.397	0.553	0.101	0.46	1.25	1.866
EX	8	22	21.45	MALE	LEAN	RED	2.30763	1.12652	0	0.25727	1.70407	2.65463
EX	8	22	21.45	MALE	LEAN	RED	2.4833	1.12652	0	0.28063	1.57511	2.60617
AA	8	18	21.5	FEMALE	LEAN	RED	3.195	3.11	0.154	1.331	1.542	1.525
AA	8	18	21.5	FEMALE	LEAN	RED	3.252	3.214	0.159	1.351	1.542	1.655
DP	8	22	22.26	MALE	LEAN	RED	6.553	14.401	0.216	1.996	2.213	2.55
DP	8	22	22.26	MALE	LEAN	RED	8.727	14.506	0.461	2.457	2.411	2.846
BO	8	47	22.28	FEMALE	LEAN	RED	11.109	3.047	0.249	10.825	10.81	2.016
BO	8	47	22.28	FEMALE	LEAN	RED	10.849	2.295	0.249	8.901	9.431	1.878
DR	8	26	22.37	MALE	LEAN	RED	4.936	2.919	0.216	1.246	2.312	2.55
DR	8	26	22.37	MALE	LEAN	RED	4.65	2.441	0.267	1.15	2.435	2.47
EI	8	23	22.51	MALE	LEAN	RED	7.57924	3.49496	0.163837	4.05862	4.82716	1.79346
EI	8	23	22.51	MALE	LEAN	RED	6.01764	2.97905	0.163837	3.95266	5.06092	1.66587
DX	8	20	22.7	MALE	LEAN	RED	4.444	5.015	0.522	0.638	1.285	2.454
DX	8	20	22.7	MALE	LEAN	RED	4.305	4.731	0.522	0.655	1.274	2.562
CZ	8	55	22.76	FEMALE	LEAN	RED	3.113	5.114	0.313	13.61	18.603	2.277
CZ	8	55	22.76	FEMALE	LEAN	RED	3.21	4.335	0.313	13.737	17.708	2.345
CC	8	21	22.82	FEMALE	LEAN	RED	2.324	1.719	0.365	16.242	22.627	4.536
CC	8	21	22.82	FEMALE	LEAN	RED	1.96	1.616	0.314	15.273	20.152	4.28
AB	8	24	23.06	MALE	LEAN	RED	0.821	1.259	0.036	0.307	2.69	1.501
AB	8	24	23.06	MALE	LEAN	RED	1.162	1.616	0.104	0.352	2.746	1.758
BL	8	23	23.66	MALE	LEAN	RED	0.389	3.424	0	0.378	1.946	1.509
BL	8	23	23.66	MALE	LEAN	RED	0.446	3.947	0.038	0.574	2.345	1.85
BV	8	19	24.13	MALE	LEAN	RED	3.16	11.305	0.876	31.826	40.203	1.979
BV	8	19	24.13	MALE	LEAN	RED	2.786	10.396	0.876	29.482	38.871	1.988
DE	8	25	24.48	FEMALE	LEAN	RED	1.309	0.78	0.179	1.222	2.671	1.708
DE	8	25	24.48	FEMALE	LEAN	RED	2.63	2.387	0.643	0.536	2.485	1.139
AP	8	23	27.87	MALE	LEAN	RED	5.138	0.991	0.428	1.442	2.516	2.405
AP	8	23	27.87	MALE	LEAN	RED	4.583	0.75	0.415	1.523	2.714	2.201
EL	8	23	27.09	MALE	OBESE	GREEN	2.79036	5.7546	0.00887992	0.63653	3.5589	2.37865
EL	8	23	27.09	MALE	OBESE	GREEN	3.14079	5.38827	0	0.692323	3.62007	2.46121
BY	8	47	27.1	MALE	OBESE	GREEN	3.633	1.719	0.064	1.05	2.615	2.163
BY	8	47	27.1	MALE	OBESE	GREEN	4.4	1.719	0.016	1.114	2.876	2.19
DM	8	18	27.56	FEMALE	OBESE	GREEN	1.21	1.012	0.158	0.356	1.932	2.767
DM	8	18	27.56	FEMALE	OBESE	GREEN	0.862	1.848	0.085	0.476	0.543	1.958
DK	8	21	27.6	MALE	OBESE	GREEN	16.132	7.028	0.773	6.019	7.249	3.097
DK	8	21	27.6	MALE	OBESE	GREEN	18.138	6.615	0.848	6.587	7.702	3.097
AX	8	22	28.45	MALE	OBESE	GREEN	4.22	19.879	0.331	5.904	4.542	4.999
AX	8	22	28.45	MALE	OBESE	GREEN	5.668	20.199	0.394	4.507	4.496	5.584
EJ	8	42	29.02	MALE	OBESE	GREEN	1.99984	2.69524	0	0.288344	8.94405	2.53707
EJ	8	42	29.02	MALE	OBESE	GREEN	2.52719	3.44826	0	0.371343	10.346	2.74479
DU	8	21	29.05	FEMALE	OBESE	GREEN	2.823	1.24	0.137	4.949	10.595	1.879
DU	8	21	29.05	FEMALE	OBESE	GREEN	2.775	1.574	0.282	4.801	11.323	2.038
CR	8	22	29.17	FEMALE	OBESE	GREEN	1.78	3.211	0.236	1.51	2.951	2.08
CR	8	22	29.17	FEMALE	OBESE	GREEN	1.78	3.32	0.249	1.634	3.026	2.062
DS	8	52	29.24	MALE	OBESE	GREEN	6.01764	3.72796	0.410054	2.81678	6.08593	2.52326
DS	8	52	29.24	MALE	OBESE	GREEN	5.58306	3.30793	0.268285	2.84433	6.22804	2.31686
AO	8	22	30.51	MALE	OBESE	GREEN	2.568	1.543	0.092	2.049	4.542	1.493
AO	8	22	30.51	MALE	OBESE	GREEN	2.283	1.334	0.056	2.31	4.725	1.704
BB	8	31	30.68	FEMALE	OBESE	GREEN	3.423	45.013	0.259	6.713	4.224	1.201
BB	8	31	30.68	FEMALE	OBESE	GREEN	4.106	40.85	0.32	6.335	4.405	1.241
CO	8	36	30.86	FEMALE	OBESE	GREEN	1.513	0.254	0.117	0.481	2.578	3.767
CO	8	36	30.86	FEMALE	OBESE	GREEN	1.513	0.344	0.091	0.418	2.485	3.511
CY	8	22	32.39	FEMALE	OBESE	GREEN	1.948	0.414	0.179	0.74	3.612	1.993
CY	8	22	32.39	FEMALE	OBESE	GREEN	1.359	0.144	0	0.572	2.758	1.549
AD	8	32	32.56	MALE	OBESE	GREEN	1.596	3.843	0.447	5.956	8.447	1.915
AD	8	32	32.56	MALE	OBESE	GREEN	1.825	4.052	0.468	7.577	10.617	2.061
CD	8	39	32.88	FEMALE	OBESE	GREEN	1.87	2.885	0.236	0.948	1.439	1.565
CD	8	39	32.88	FEMALE	OBESE	GREEN	2.416	3.982	0.365	1.51	2.149	2.246
DB	8	52	33.11	FEMALE	OBESE	GREEN	18.278	1.793	0.582	3.797	4.299	3.531
DB	8	52	33.11	FEMALE	OBESE	GREEN	21.167	2.119	0.606	4.287	5.539	4.274
BQ	8	21	33.12	MALE	OBESE	GREEN	1.513	1.209	0.077	2.456	4.678	2.2
BQ	8	21	33.12	MALE	OBESE	GREEN	1.468	1.009	0.091	2.386	4.084	2.548
EY	8	20	33.73	MALE	OBESE	GREEN	7.31926	9.4035	0.477226	14.7625	17.1695	1.4062
EY	8	20	33.73	MALE	OBESE	GREEN	7.70919	8.85631	0.465964	16.2696	19.896	1.23492
BX	8	20	33.75	MALE	OBESE	GREEN	2.233	1.719	0.144	0.701	2.075	2.209
BX	8	20	33.75	MALE	OBESE	GREEN	2.096	2.137	0.196	0.721	1.982	2.319
AI	8	44	34.98	FEMALE	OBESE	GREEN	1.338	1.96	0.178	1.185	5.622	6.015
AI	8	44	34.98	FEMALE	OBESE	GREEN	1.31	2.221	0.188	1.227	5.715	6.072
EN	8	55	35.48	MALE	OBESE	GREEN	0.356	0	0	0.524	3.65	3.588
EN	8	55	35.48	MALE	OBESE	GREEN	0.661	0	0	0.704	4.261	4.194
ES	8	31	26.45	MALE	OBESE	RED	2.74652	0	0	0.176238	2.93514	3.09357
ES	8	31	26.45	MALE	OBESE	RED	3.22833	1.12652	0	0.176238	2.95501	2.66849
CS	8	34	26.88	FEMALE	OBESE	RED	3.066	1.009	0.196	3.667	1.477	2.154
CS	8	34	26.88	FEMALE	OBESE	RED	2.786	1.009	0.117	3.771	1.496	2.227
AV	8	26	27.43	FEMALE	OBESE	RED	0.331	2.378	0.065	0.306	2.793	1.915
AV	8	26	27.43	FEMALE	OBESE	RED	0.331	2.064	0.047	0.337	3.058	1.72
AF	8	22	27.61	MALE	OBESE	RED	1.424	0.917	0.038	0	2.552	2.807
AF	8	22	27.61	MALE	OBESE	RED	1.252	1.021	0.056	0	2.487	2.831
EU	8	20	27.7	FEMALE	OBESE	RED	3.349	2.993	0.196	4.152	6.174	3.584
EU	8	20	27.7	FEMALE	OBESE	RED	3.066	2.777	0.236	4.317	6.124	3.621
ET	8	19	28.2	FEMALE	OBESE	RED	2.65881	1.87742	0	0.408191	1.59345	1.69938
ET	8	19	28.2	FEMALE	OBESE	RED	3.05323	2.12056	0.0295527	0.523639	1.46564	1.67257
AZ	8	21	28.88	FEMALE	OBESE	RED	1.94	4.262	0.352	0.729	2.925	1.971
AZ	8	21	28.88	FEMALE	OBESE	RED	2.054	2.848	0.289	0.44	1.967	1.071
BC	8	24	28.89	FEMALE	OBESE	RED	1.023	3.057	2.265	2.79	3.975	2.158
BC	8	24	28.89	FEMALE	OBESE	RED	0.85	3.005	1.787	2.79	4.133	2.125
DH	8	28	29.18	FEMALE	OBESE	RED	1.556	0.216	0.085	0.236	2.658	2.186
DH	8	28	29.18	FEMALE	OBESE	RED	1.457	0.284	0.282	0.212	2.435	1.924
DN	8	21	29.28	MALE	OBESE	RED	18.837	5.994	0.961	20.345	19.3	4.332
DN	8	21	29.28	MALE	OBESE	RED	19.583	5.166	1.165	23.267	22.07	4.114
EC	8	55	29.56	FEMALE	OBESE	RED	1.02824	1.3309	0.0210233	1.20518	6.62377	3.14965
EC	8	55	29.56	FEMALE	OBESE	RED	1.11691	0.477364	0.0128163	1.0559	5.29608	3.45238
AG	8	27	30.15	MALE	OBESE	RED	3.491	3.927	0.131	0.864	2.094	1.676
AG	8	27	30.15	MALE	OBESE	RED	3.633	4.094	0.091	0.873	2.084	1.804
EM	8	62	30.39	MALE	OBESE	RED	2.726	2.226	0.179	2.287	8.049	2.254
EM	8	62	30.39	MALE	OBESE	RED	2.92	1.629	0.125	2.142	7.755	2.277
AL	8	29	30.61	FEMALE	OBESE	RED	1.711	2.587	0.248	0.44	2.793	1.979
AL	8	29	30.61	FEMALE	OBESE	RED	1.911	2.378	0.259	0.605	2.903	2.239
AW	8	25	30.95	MALE	OBESE	RED	0.965	0.813	0.038	0.193	1.871	1.639
AW	8	25	30.95	MALE	OBESE	RED	1.023	0.397	0.021	0.152	1.701	1.622
EQ	8	60	32.59	FEMALE	OBESE	RED	2.96564	1.28016	0	0.437369	3.92787	1.41282
EQ	8	60	32.59	FEMALE	OBESE	RED	0	0.591466	0.0610451	0	3.25514	0
DL	8	51	32.66	MALE	OBESE	RED	0.761643	0.756961	0	0.184629	3.56908	2.57852
DL	8	51	32.66	MALE	OBESE	RED	0.761643	0.917633	0	0.192943	3.31561	2.39239
EK	8	21	32.72	MALE	OBESE	RED	5.06102	0.917633	0.454728	0.466317	2.80639	5.57836
EK	8	21	32.72	MALE	OBESE	RED	3.6656	0	0.278978	0.28063	2.62938	4.53792
CJ	8	26	33.7	FEMALE	OBESE	RED	4.983	0.389	0.057	0.892	2.28	2.796
CJ	8	26	33.7	FEMALE	OBESE	RED	4.207	0.344	0.043	0.948	2.131	2.759
DI	8	48	33.98	FEMALE	OBESE	RED	4.075	3.183	0.357	1.077	1.677	1.572
DI	8	48	33.98	FEMALE	OBESE	RED	4.171	3.289	0.25	1.102	1.701	1.651
EV	8	45	34.25	MALE	OBESE	RED	2.52719	6.30309	0.257633	39.5451	61.1759	1.18255
EV	8	45	34.25	MALE	OBESE	RED	2.21974	6.30309	0.28971	40.2795	63.7898	1.11731
DQ	8	53	34.38	MALE	OBESE	RED	0.56	0.539	0.047	0.128	3.108	2.254
DQ	8	53	34.38	MALE	OBESE	RED	0.56	0.539	0	0.14	2.858	2.368
EB	8	54	35.55	MALE	OBESE	RED	1.55912	10.7734	0.163837	41.3443	77.7507	5.1616
EB	8	54	35.55	MALE	OBESE	RED	1.16121	9.67724	0.205027	41.4752	78.7038	4.89975

## Sheet: Delta TNFa
LR-W0	LR-W8		LG-W0	LG-W8		OR-W0	OR-W8		OG-W0	OG-W8
2.269	1.881	-0.388	1.864	1.912	0.048	3.045	3.094	0.049	2.324	2.379	0.055
2.119	2.269	0.15	2.056	1.589	-0.467	2.975	2.668	-0.307	2.682	2.461	-0.221
2.106	2.778	0.672	1.933	1.676	-0.257	2.154	2.154	0	2.576	2.163	-0.413
2.892	2.869	-0.023	1.878	1.657	-0.221	1.988	2.227	0.239	2.383	2.19	-0.193
2.664	2.892	0.228	2.154	1.924	-0.23	2.093	1.915	-0.178	3.166	2.767	-0.399
2.744	2.88	0.136	2.227	1.694	-0.533	2.012	1.72	-0.292	2.915	1.958	-0.957
1.593	1.768	0.175	2.594	2.356	-0.238	2.856	2.807	-0.049	2.767	3.097	0.33
1.694	1.694	0	2.723	2.631	-0.092	2.198	2.831	0.633	2.88	3.097	0.217
1.842	1.493	-0.349	2.664	2.493	-0.171	4.701	3.584	-1.117	2.353	4.999	2.646
1.744	1.647	-0.097	2.527	2.436	-0.091	4.518	3.621	-0.897	2.612	5.584	2.972
0.876	1.014	0.138	2.08	1.814	-0.266	1.861	1.699	-0.162	3.516	2.537	-0.979
0.925	1.103	0.178	1.814	2.264	0.45	1.72	1.673	-0.047	2.863	2.745	-0.118
2.553	2.356	-0.197	1.646	1.921	0.275	1.996	1.971	-0.025	2.027	1.879	-0.148
2.572	2.162	-0.41	1.646	2.249	0.603	1.306	1.071	-0.235	1.799	2.038	0.239
3.375	3.375	0	3.073	2.891	-0.182	3.083	2.158	-0.925	2.255	2.08	-0.175
3.164	3.382	0.218	3.024	2.551	-0.473	2.758	2.125	-0.633	2.135	2.062	-0.073
0.988	0.84	-0.148	5.005	0.37	-4.635	1.685	2.186	0.501	4.092	2.523	-1.569
0.936	0.878	-0.058	3.311	3.902	0.591	1.776	1.924	0.148	4.372	2.317	-2.055
2.892	2.732	-0.16	1.62	1.399	-0.221	3.531	4.332	0.801	1.412	1.493	0.081
2.641	2.664	0.023	1.537	1.712	0.175	5.25	4.114	-1.136	1.322	1.704	0.382
2.288	2.109	-0.179	2.596	2.328	-0.268	5.439	3.15	-2.289	1.168	1.201	0.033
2.645	1.866	-0.779	2.158	1.768	-0.39	4.617	3.452	-1.165	1.111	1.241	0.13
2.503	2.655	0.152	0.613	1.261	0.648	1.59	1.676	0.086	4.024	3.767	-0.257
2.503	2.606	0.103	0.602	1.499	0.897	1.574	1.804	0.23	4.015	3.511	-0.504
1.817	1.525	-0.292	2.369	1.541	-0.828	2.778	2.254	-0.524	0.991	1.993	1.002
1.379	1.655	0.276	1.444	1.493	0.049	2.345	2.277	-0.068	1.936	1.549	-0.387
2.71	2.55	-0.16	1.199	0.982	-0.217	2.296	1.979	-0.317	2.125	1.915	-0.21
2.618	2.846	0.228	1.136	1.163	0.027	2.125	2.239	0.114	2.539	2.061	-0.478
2.365	2.016	-0.349	2.979	2.374	-0.605	2.028	1.639	-0.389	2.337	1.565	-0.772
1.988	1.878	-0.11	2.778	2.503	-0.275	1.866	1.622	-0.244	2.594	2.246	-0.348
2.47	2.55	0.08	0.928	2.405	1.477	1.222	1.413	0.191	4.08	3.531	-0.549
2.505	2.47	-0.035	4.108	2.73	-1.378	1.307	0	-1.307	3.874	4.274	0.4
1.446	1.793	0.347	1.759	1.486	-0.273	2.475	2.579	0.104	2.759	2.2	-0.559
1.956	1.666	-0.29	1.646	1.57	-0.076	2.773	2.392	-0.381	3.034	2.548	-0.486
2.239	2.454	0.215	3.459	4.784	1.325	4.085	5.578	1.493	1.713	1.406	-0.307
2.415	2.562	0.147	3.679	4.842	1.163	4.387	4.538	0.151	1.32	1.235	-0.085
2.152	2.277	0.125	1.235	1.169	-0.066	4.262	2.796	-1.466	2.677	2.209	-0.468
2.14	2.345	0.205	1.248	1.196	-0.052	4.536	2.759	-1.777	2.099	2.319	0.22
3.502	4.536	1.034	3.707	3.843	0.136	1.572	1.572	0	4.317	6.015	1.698
3.749	4.28	0.531	2.717	4.007	1.29	1.572	1.651	0.079	4.243	6.072	1.829
2.135	1.501	-0.634	2.49	2.823	0.333	1.183	1.183	0	4.125	3.588	-0.537
2.043	1.758	-0.285	2.207	2.71	0.503	1.065	1.117	0.052	4.332	4.194	-0.138
2.596	1.509	-1.087	2.357	2.903	0.546	2.846	2.254	-0.592
2.596	1.85	-0.746	2.505	3.188	0.683	2.789	2.368	-0.421
1.657	1.979	0.322	2.71	2.14	-0.57	5.571	5.162	-0.409
1.666	1.988	0.322	2.778	2.049	-0.729	5.865	4.9	-0.965
1.503	1.708	0.205	0.946	1.036	0.09
1.23	1.139	-0.091	1.018	0.955	-0.063
3.13	2.405	-0.725	2.576	2.704	0.128
3.22	2.201	-1.019	2.034	2.759	0.725

## Sheet: Delta TNFa-Outlier
LG-W0	LG-W8		LR-W0	LR-W8		OG-W0	OG-W8		OR-W0	OR-W8
1.864	1.912	0.048	2.269	1.881	-0.388	3.166	2.767	-0.399	3.045	3.094	0.049
2.056	1.589	-0.467	2.119	2.269	0.15	2.915	1.958	-0.957	2.975	2.668	-0.307
1.933	1.676	-0.257	2.106	2.778	0.672	2.767	3.097	0.33	2.154	2.154	0
1.878	1.657	-0.221	2.892	2.869	-0.023	2.88	3.097	0.217	1.988	2.227	0.239
2.154	1.924	-0.23	2.664	2.892	0.228	2.353	4.999	2.646	2.093	1.915	-0.178
2.227	1.694	-0.533	2.744	2.88	0.136				2.012	1.72	-0.292
2.594	2.356	-0.238	1.593	1.768	0.175	3.516	2.537	-0.979	2.856	2.807	-0.049
2.723	2.631	-0.092	1.694	1.694	0	2.863	2.745	-0.118	2.198	2.831	0.633
2.664	2.493	-0.171	1.842	1.493	-0.349	2.027	1.879	-0.148	4.701	3.584	-1.117
2.527	2.436	-0.091	1.744	1.647	-0.097	1.799	2.038	0.239	4.518	3.621	-0.897
2.08	1.814	-0.266	0.876	1.014	0.138	2.255	2.08	-0.175	1.861	1.699	-0.162
1.814	2.264	0.45	0.925	1.103	0.178	2.135	2.062	-0.073	1.72	1.673	-0.047
1.646	1.921	0.275	2.553	2.356	-0.197	4.092	2.523	-1.569	1.996	1.971	-0.025
1.646	2.249	0.603	2.572	2.162	-0.41	4.372	2.317	-2.055	1.306	1.071	-0.235
3.073	2.891	-0.182	3.375	3.375	0	1.412	1.493	0.081	3.083	2.158	-0.925
3.024	2.551	-0.473	3.164	3.382	0.218	1.322	1.704	0.382	2.758	2.125	-0.633
5.005	0.37	-4.635	0.988	0.84	-0.148	1.168	1.201	0.033	1.685	2.186	0.501
3.311	3.902	0.591	0.936	0.878	-0.058	1.111	1.241	0.13	1.776	1.924	0.148
1.62	1.399	-0.221	2.892	2.732	-0.16	4.024	3.767	-0.257	3.531	4.332	0.801
1.537	1.712	0.175	2.641	2.664	0.023	4.015	3.511	-0.504	5.25	4.114	-1.136
2.596	2.328	-0.268	2.288	2.109	-0.179	0.991	1.993	1.002	5.439	3.15	-2.289
2.158	1.768	-0.39	2.645	1.866	-0.779	1.936	1.549	-0.387	4.617	3.452	-1.165
0.613	1.261	0.648	2.503	2.655	0.152	2.125	1.915	-0.21	1.59	1.676	0.086
0.602	1.499	0.897	2.503	2.606	0.103	2.539	2.061	-0.478	1.574	1.804	0.23
2.369	1.541	-0.828	1.817	1.525	-0.292	2.337	1.565	-0.772	2.778	2.254	-0.524
1.444	1.493	0.049	1.379	1.655	0.276	2.594	2.246	-0.348	2.345	2.277	-0.068
1.199	0.982	-0.217	2.71	2.55	-0.16	4.08	3.531	-0.549	2.296	1.979	-0.317
1.136	1.163	0.027	2.618	2.846	0.228	3.874	4.274	0.4	2.125	2.239	0.114
2.979	2.374	-0.605	2.365	2.016	-0.349	2.759	2.2	-0.559	2.028	1.639	-0.389
2.778	2.503	-0.275	1.988	1.878	-0.11	3.034	2.548	-0.486	1.866	1.622	-0.244
0.928	2.405	1.477	2.47	2.55	0.08	1.713	1.406	-0.307	1.222	1.413	0.191
4.108	2.73	-1.378	2.505	2.47	-0.035	1.32	1.235	-0.085	1.307	0	-1.307
1.759	1.486	-0.273	1.446	1.793	0.347	2.677	2.209	-0.468	2.475	2.579	0.104
1.646	1.57	-0.076	1.956	1.666	-0.29	2.099	2.319	0.22	2.773	2.392	-0.381
3.459	4.784	1.325	2.239	2.454	0.215				4.085	5.578	1.493
3.679	4.842	1.163	2.415	2.562	0.147				4.387	4.538	0.151
1.235	1.169	-0.066	2.152	2.277	0.125	4.125	3.588	-0.537	4.262	2.796	-1.466
1.248	1.196	-0.052	2.14	2.345	0.205	4.332	4.194	-0.138	4.536	2.759	-1.777
3.707	3.843	0.136	3.502	4.536	1.034	4.317	6.015	1.698	1.572	1.572	0
2.717	4.007	1.29	3.749	4.28	0.531	4.243	6.072	1.829	1.572	1.651	0.079
2.49	2.823	0.333	2.135	1.501	-0.634	4.125	3.588	-0.537	1.183	1.183	0
2.207	2.71	0.503	2.043	1.758	-0.285	4.332	4.194	-0.138	1.065	1.117	0.052
2.357	2.903	0.546	2.596	1.509	-1.087				2.846	2.254	-0.592
2.505	3.188	0.683	2.596	1.85	-0.746				2.789	2.368	-0.421
2.71	2.14	-0.57	1.657	1.979	0.322				5.571	5.162	-0.409
2.778	2.049	-0.729	1.666	1.988	0.322				5.865	4.9	-0.965
0.946	1.036	0.09	1.503	1.708	0.205
1.018	0.955	-0.063	1.23	1.139	-0.091
2.576	2.704	0.128	3.13	2.405	-0.725
2.034	2.759	0.725	3.22	2.201	-1.019

## Sheet: Delta IL-8
LR-W0	LR-W8		LG-W0	LG-W8		OR-W0	OR-W8		OG-W0	OG-W8
2.232	2.29	0.058	1.681	1.938	0.257	3.055	2.935	-0.12	2.737	3.559	0.822
1.985	2.639	0.654	2.152	1.589	-0.563	3.035	2.955	-0.08	3.045	3.62	0.575
2.783	3.764	0.981	3.572	1.963	-1.609	1.117	1.477	0.36	2.764	2.615	-0.149
3.233	3.789	0.556	3.875	2.168	-1.707	1.117	1.496	0.379	2.727	2.876	0.149
2.46	2.46	0	7.217	4.832	-2.385	3.66	2.793	-0.867	1.701	1.932	0.231
2.783	1.968	-0.815	7.288	5.494	-1.794	3.369	3.058	-0.311	1.604	0.543	-1.061
1.749	1.972	0.223	3.477	2.989	-0.488	1.797	2.552	0.755	6.746	7.249	0.503
1.87	1.926	0.056	3.78	2.858	-0.922	1.818	2.487	0.669	6.508	7.702	1.194
2.183	2.399	0.216	2.534	3.764	1.23	5.289	6.174	0.885	3.28	4.542	1.262
2.302	2.226	-0.076	2.559	3.688	1.129	5.494	6.124	0.63	3.147	4.496	1.349
20.745	22.449	1.704	2.177	2.41	0.233	1.612	1.593	-0.019	11.964	8.944	-3.02
17.375	23.435	6.06	2.103	2.261	0.158	1.447	1.466	0.019	12.37	10.346	-2.024
2.48	2.467	-0.013	1.408	1.521	0.113	2.14	2.925	0.785	12.889	10.595	-2.294
2.492	2.358	-0.134	1.521	1.821	0.3	1.606	1.967	0.361	14.262	11.323	-2.939
6.734	7.045	0.311	1.529	1.511	-0.018	6.742	3.975	-2.767	4.813	2.951	-1.862
5.922	7.424	1.502	1.52	1.612	0.092	4.908	4.133	-0.775	4.774	3.026	-1.748
4.218	3.015	-1.203	48.283	2.529	-45.754	2.485	2.658	0.173	6.184	6.086	-0.098
3.488	2.777	-0.711	49.096	43.11	-5.986	2.559	2.435	-0.124	7.57	6.228	-1.342
3.233	2.596	-0.637	1.627	1.345	-0.282	15.534	19.3	3.766	4.931	4.542	-0.389
2.833	2.485	-0.348	1.477	1.627	0.15	16.503	22.07	5.567	3.795	4.725	0.93
1.27	1.333	0.063	4.02	1.616	-2.404	8.327	6.624	-1.703	5.947	4.224	-1.723
1.648	1.25	-0.398	3.671	1.521	-2.15	8.1	5.296	-2.804	2.925	4.405	1.48
1.723	1.704	-0.019	0.001	7.201	7.2	2.399	2.094	-0.305	2.503	2.578	0.075
1.52	1.575	0.055	0.04	8.123	8.083	2.204	2.084	-0.12	2.671	2.485	-0.186
2.01	1.542	-0.468	16.92	16.567	-0.353	6.746	8.049	1.303	2.017	3.612	1.595
1.521	1.542	0.021	15.21	16.971	1.761	5.826	7.755	1.929	3.561	2.758	-0.803
2.522	2.213	-0.309	3.996	4.61	0.614	3.503	2.793	-0.71	2.782	8.447	5.665
2.263	2.411	0.148	3.904	5.318	1.414	2.903	2.903	0	7.047	10.617	3.57
9.021	10.81	1.789	3.073	2.867	-0.206	2.226	1.871	-0.355	2.01	1.439	-0.571
7.644	9.431	1.787	2.858	2.97	0.112	2.096	1.701	-0.395	2.149	2.149	0
2.14	2.312	0.172	7.587	50.271	42.684	3.185	3.928	0.743	4.248	4.299	0.051
2.584	2.435	-0.149	12.868	29.038	16.17	3.185	3.255	0.07	5.331	5.539	0.208
3.856	4.827	0.971	2.261	2.116	-0.145	3.417	3.569	0.152	5.543	4.678	-0.865
5.619	5.061	-0.558	1.997	1.962	-0.035	3.6	3.316	-0.284	5.533	4.084	-1.449
1.487	1.285	-0.202	1.872	2.59	0.718	2.06	2.806	0.746	12.598	17.169	4.571
1.186	1.274	0.088	2.079	2.688	0.609	2.299	2.629	0.33	25.734	19.896	-5.838
15.279	18.603	3.324	1.548	1.557	0.009	3.073	2.28	-0.793	2.858	2.075	-0.783
14.939	17.708	2.769	1.649	1.484	-0.165	3.458	2.131	-1.327	2.624	1.982	-0.642
18.413	22.627	4.214	5.511	7.402	1.891	1.847	1.677	-0.17	3.817	5.622	1.805
17.26	20.152	2.892	3.661	7.604	3.943	1.968	1.701	-0.267	3.93	5.715	1.785
2.429	2.69	0.261	2.914	2.356	-0.558	4.827	61.176	56.349	5.098	3.65	-1.448
2.494	2.746	0.252	2.859	2.465	-0.394	4.965	63.79	58.825	4.942	4.261	-0.681
17.274	1.946	-15.328	2.559	3.133	0.574	3.284	3.108	-0.176
17.502	2.345	-15.157	2.312	3.828	1.516	3.133	2.858	-0.275
32.355	40.203	7.848	27.863	26.118	-1.745	75.602	77.751	2.149
38.886	38.871	-0.015	28.871	20.731	-8.14	79.565	78.704	-0.861
3.259	2.671	-0.588	1.868	1.33	-0.538
2.82	2.485	-0.335	1.938	1.099	-0.839
3.474	2.516	-0.958	2.559	2.662	0.103
3.812	2.714	-1.098	2.391	3.195	0.804

## Sheet: Delta IL-8-Outlier
LG-W0	LG-W8		LR-W0	LR-W8		OG-W0	OG-W8		OR-W0	OR-W8
1.681	1.938	0.257	2.232	2.29	0.058	2.737	3.559	0.822	3.055	2.935	-0.12
2.152	1.589	-0.563	1.985	2.639	0.654	3.045	3.62	0.575	3.035	2.955	-0.08
3.572	1.963	-1.609	2.783	3.764	0.981	2.764	2.615	-0.149	3.117	3.477	0.36
3.875	2.168	-1.707	3.233	3.789	0.556	2.727	2.876	0.149	4.117	4.496	0.379
7.217	4.832	-2.385	2.46	2.46	0	1.701	1.932	0.231	3.66	2.793	-0.867
7.288	5.494	-1.794	2.783	1.968	-0.815	1.604	0.543	-1.061	3.369	3.058	-0.311
3.477	2.989	-0.488	1.749	1.972	0.223	6.746	7.249	0.503	1.797	2.552	0.755
3.78	2.858	-0.922	1.87	1.926	0.056	6.508	7.702	1.194	1.818	2.487	0.669
2.534	3.764	1.23	2.183	2.399	0.216	3.28	4.542	1.262	5.289	6.174	0.885
2.559	3.688	1.129	2.302	2.226	-0.076	3.147	4.496	1.349	5.494	6.124	0.63
2.177	2.41	0.233							3.612	3.593	-0.019
2.103	2.261	0.158							3.447	3.466	0.019
1.408	1.521	0.113	2.48	2.467	-0.013				2.14	2.925	0.785
1.521	1.821	0.3	2.492	2.358	-0.134				1.606	1.967	0.361
1.529	1.511	-0.018	6.734	7.045	0.311	4.813	2.951	-1.862	6.742	3.975	-2.767
1.52	1.612	0.092	5.922	7.424	1.502	4.774	3.026	-1.748	4.908	4.133	-0.775
			4.218	3.015	-1.203	6.184	6.086	-0.098	2.485	2.658	0.173
			3.488	2.777	-0.711	7.57	6.228	-1.342	2.559	2.435	-0.124
1.627	1.345	-0.282	3.233	2.596	-0.637	4.931	4.542	-0.389
1.477	1.627	0.15	2.833	2.485	-0.348	3.795	4.725	0.93
4.02	1.616	-2.404	1.27	1.333	0.063	5.947	4.224	-1.723	8.327	6.624	-1.703
3.671	1.521	-2.15	1.648	1.25	-0.398	2.925	4.405	1.48	8.1	5.296	-2.804
3.001	7.201	4.2	1.723	1.704	-0.019	2.503	2.578	0.075	2.399	2.094	-0.305
7.04	8.123	1.083	1.52	1.575	0.055	2.671	2.485	-0.186	2.204	2.084	-0.12
			2.01	1.542	-0.468	2.017	3.612	1.595	6.746	8.049	1.303
			1.521	1.542	0.021	3.561	2.758	-0.803	5.826	7.755	1.929
3.996	4.61	0.614	2.522	2.213	-0.309	2.782	8.447	5.665	3.503	2.793	-0.71
3.904	5.318	1.414	2.263	2.411	0.148				2.903	2.903	0
3.073	2.867	-0.206				2.01	1.439	-0.571	2.226	1.871	-0.355
2.858	2.97	0.112	7.644	9.431	1.787	2.149	2.149	0	2.096	1.701	-0.395
		0	2.14	2.312	0.172	4.248	4.299	0.051	3.185	3.928	0.743
		0	2.584	2.435	-0.149	5.331	5.539	0.208	3.185	3.255	0.07
2.261	2.116	-0.145	3.856	4.827	0.971	5.543	4.678	-0.865	3.417	3.569	0.152
1.997	1.962	-0.035	5.619	5.061	-0.558	5.533	4.084	-1.449	3.6	3.316	-0.284
1.872	2.59	0.718	1.487	1.285	-0.202				2.06	2.806	0.746
2.079	2.688	0.609	1.186	1.274	0.088				2.299	2.629	0.33
1.548	1.557	0.009				2.858	2.075	-0.783	3.073	2.28	-0.793
1.649	1.484	-0.165				2.624	1.982	-0.642	3.458	2.131	-1.327
5.511	7.402	1.891				3.817	5.622	1.805	1.847	1.677	-0.17
3.661	7.604	3.943				3.93	5.715	1.785	1.968	1.701	-0.267
2.914	2.356	-0.558	2.429	2.69	0.261	5.098	3.65	-1.448
2.859	2.465	-0.394	2.494	2.746	0.252	4.942	4.261	-0.681
2.559	3.133	0.574							3.284	3.108	-0.176
2.312	3.828	1.516							3.133	2.858	-0.275
											0
											0
1.868	1.33	-0.538	3.259	2.671	-0.588						0
1.938	1.099	-0.839	2.82	2.485	-0.335						0
2.559	2.662	0.103	3.474	2.516	-0.958						0
2.391	3.195	0.804	3.812	2.714	-1.098						0

## Sheet: Delta IL-6
LR-W0	LR-W8		LG-W0	LG-W8		OR-W0	OR-W8		OG-W0	OG-W8
0.995	0.637	-0.358	0.523	0.961	0.438	0.304	0.176	-0.128	0.538	0.637	0.099
0.844	0.796	-0.048	0.747	0.663	-0.084	0.342	0.176	-0.166	0.58	0.692	0.112
0.476	0.752	0.276	1.059	0.967	-0.092	5.496	3.667	-1.829	1.403	1.05	-0.353
0.524	0.644	0.12	0.985	0.929	-0.056	5.373	3.771	-1.602	1.296	1.114	-0.182
0.045	0.164	0.119	4.526	3.477	-1.049	0.46	0.306	-0.154	0.356	0.356	0
0.116	0.092	-0.024	4.918	3.477	-1.441	0.502	0.337	-0.165	0.284	0.476	0.192
0.583	0.662	0.079	0.797	1.068	0.271	0	0	0	5.182	6.019	0.837
0.643	0.603	-0.04	0.854	1.096	0.242	0	0	0	5.649	6.587	0.938
0.419	0.44	0.021	0.212	0.164	-0.048	4.465	4.152	-0.313	4.046	5.904	1.858
0.46	0.522	0.062	0.236	0.188	-0.048	4.622	4.317	-0.305	3.784	4.507	0.723
10.72	12.559	1.839	0.948	1.059	0.111	0.466	0.408	-0.058	0.281	0.288	0.007
7.766	12.591	4.825	0.929	1.151	0.222	0.495	0.524	0.029	0.249	0.371	0.122
0.507	0.458	-0.049	0.363	0.271	-0.092	0.646	0.729	0.083	9.432	4.949	-4.483
0.491	0.458	-0.033	0.317	0.356	0.039	0.502	0.44	-0.062	10.37	4.801	-5.569
1.543	1.78	0.237	0	0.086	0.086	2.832	2.79	-0.042	2.56	1.51	-1.05
1.537	2.167	0.63	0	0.086	0.086	2.978	2.79	-0.188	2.378	1.634	-0.744
0.124	0.241	0.117	35.598	1.451	-34.147	0.212	0.236	0.024	3.406	2.817	-0.589
0.075	0.257	0.182	37.635	34.623	-3.012	0.14	0.212	0.072	3.889	2.844	-1.045
1.573	1.754	0.181	0.816	0.643	-0.173	13.889	20.345	6.456	2.289	2.049	-0.24
1.391	1.609	0.218	0.75	0.759	0.009	13.306	23.267	9.961	1.31	2.31	1
0.543	0.595	0.052	0.615	0.44	-0.175	1.523	1.205	-0.318	6.977	6.713	-0.264
0.564	0.46	-0.104	0.481	0.275	-0.206	1.374	1.056	-0.318	4.675	6.335	1.66
0.257	0.257	0	0.116	1.943	1.827	0.667	0.864	0.197	0.502	0.481	-0.021
0.241	0.281	0.04	0.128	2.065	1.937	0.667	0.873	0.206	0.522	0.418	-0.104
0.884	1.331	0.447	13.067	10.593	-2.474	1.633	2.287	0.654	0.356	0.74	0.384
0.719	1.351	0.632	11.396	10.435	-0.961	1.186	2.142	0.956	0.993	0.572	-0.421
1.887	1.996	0.109	0.705	0.739	0.034	0.677	0.44	-0.237	0.957	5.956	4.999
1.536	2.457	0.921	0.68	0.858	0.178	0.978	0.605	-0.373	4.654	7.577	2.923
8.91	10.825	1.915	0.797	0.682	-0.115	0.173	0.193	0.02	1.205	0.948	-0.257
8.401	8.901	0.5	0.74	0.682	-0.058	0.132	0.152	0.02	1.259	1.51	0.251
1.029	1.246	0.217	4.34	19.733	15.393	0.394	0.437	0.043	3.895	3.797	-0.098
1.271	1.15	-0.121	7.549	13.615	6.066	0.423	0	-0.423	3.846	4.287	0.441
3.273	4.059	0.786	0.256	0.084	-0.172	0.176	0.185	0.009	2.308	2.456	0.148
4.399	3.953	-0.446	0.196	0.125	-0.071	0	0.193	0.193	2.612	2.386	-0.226
0.875	0.638	-0.237	0	0.364	0.364	0.671	0.466	-0.205	11.986	14.762	2.776
0.697	0.655	-0.042	0	0.408	0.408	0.466	0.281	-0.185	20.424	16.27	-4.154
11.966	13.61	1.644	0.775	0.623	-0.152	1.223	0.892	-0.331	0.682	0.701	0.019
12.105	13.737	1.632	0.657	0.637	-0.02	1.43	0.948	-0.482	0.623	0.721	0.098
14.178	16.242	2.064	1.916	3.833	1.917	0.596	1.077	0.481	1.997	1.185	-0.812
13.918	15.273	1.355	2.283	4.009	1.726	0.62	1.102	0.482	2.456	1.227	-1.229
0.583	0.307	-0.276	4.413	2.832	-1.581	2.174	39.545	37.371	0.728	0.524	-0.204
0.701	0.352	-0.349	4.486	3.878	-0.608	2.133	40.279	38.146	0.692	0.704	0.012
14.762	0.378	-14.384	2.956	3.895	0.939	0.188	0.128	-0.06			0
14.91	0.574	-14.336	3.017	4.752	1.735	0.164	0.14	-0.024			0
25.282	31.826	6.544	14.817	13.458	-1.359	38.986	41.344	2.358			0
27.761	29.482	1.721	15.723	9.957	-5.766	40.474	41.475	1.001			0
0.476	1.222	0.746	0.084	0.084	0			0			0
0.356	0.536	0.18	0.111	0.071	-0.04			0			0
1.587	1.442	-0.145	1.323	1.457	0.134			0			0
1.716	1.523	-0.193	1.16	1.775	0.615			0			0

## Sheet: Delta IL-6-Outlier
LG-W0	LG-W8		LR-W0	LR-W8		OG-W0	OG-W8		OR-W0	OR-W8
0.523	0.961	0.438	0.995	0.637	-0.358	0.538	0.637	0.099
0.747	0.663	-0.084	0.844	0.796	-0.048	0.58	0.692	0.112
1.059	0.967	-0.092	0.476	0.752	0.276	1.403	1.05	-0.353	5.496	3.667	-1.829
0.985	0.929	-0.056	0.524	0.644	0.12	1.296	1.114	-0.182	5.373	3.771	-1.602
4.526	3.477	-1.049	0.045	0.164	0.119	0.356	0.356	0	1.46	1.306	-0.154
4.918	3.477	-1.441	0.116	0.092	-0.024	0.284	0.476	0.192	1.502	1.337	-0.165
0.797	1.068	0.271	0.583	0.662	0.079	5.182	6.019	0.837
0.854	1.096	0.242	0.643	0.603	-0.04	5.649	6.587	0.938
0.212	0.164	-0.048	0.419	0.44	0.021	4.046	5.904	1.858	4.465	4.152	-0.313
0.236	0.188	-0.048	0.46	0.522	0.062	3.784	4.507	0.723	4.622	4.317	-0.305
0.948	1.059	0.111				0.281	0.288	0.007	1.466	1.408	-0.058
0.929	1.151	0.222				0.249	0.371	0.122	1.495	1.524	0.029
0.363	0.271	-0.092	0.507	0.458	-0.049				0.646	0.729	0.083
0.317	0.356	0.039	0.491	0.458	-0.033				0.502	0.44	-0.062
0	0.086	0.086	1.543	1.78	0.237	2.56	1.51	-1.05	2.832	2.79	-0.042
0	0.086	0.086	1.537	2.167	0.63	2.378	1.634	-0.744	2.978	2.79	-0.188
			0.124	0.241	0.117	3.406	2.817	-0.589
			0.075	0.257	0.182	3.889	2.844	-1.045
0.816	0.643	-0.173	1.573	1.754	0.181	2.289	2.049	-0.24
0.75	0.759	0.009	1.391	1.609	0.218	1.31	2.31	1
0.615	0.44	-0.175	0.543	0.595	0.052				1.523	1.205	-0.318
0.481	0.275	-0.206	0.564	0.46	-0.104				1.374	1.056	-0.318
0.116	1.943	1.827	0.257	0.257	0	0.502	0.481	-0.021	0.667	0.864	0.197
0.128	2.065	1.937	0.241	0.281	0.04	0.522	0.418	-0.104	0.667	0.873	0.206
			0.884	1.331	0.447	0.356	0.74	0.384	1.633	2.287	0.654
			0.719	1.351	0.632	0.993	0.572	-0.421	1.186	2.142	0.956
0.705	0.739	0.034	1.887	1.996	0.109				0.677	0.44	-0.237
0.68	0.858	0.178	1.536	2.457	0.921				0.978	0.605	-0.373
0.797	0.682	-0.115				1.205	0.948	-0.257	0.173	0.193	0.02
0.74	0.682	-0.058				1.259	1.51	0.251	0.132	0.152	0.02
			1.029	1.246	0.217	3.895	3.797	-0.098	0.394	0.437	0.043
			1.271	1.15	-0.121	3.846	4.287	0.441	0.423	0	-0.423
0.256	0.084	-0.172	3.273	4.059	0.786	2.308	2.456	0.148	0.176	0.185	0.009
0.196	0.125	-0.071	4.399	3.953	-0.446	2.612	2.386	-0.226
0	0.364	0.364	0.875	0.638	-0.237				0.671	0.466	-0.205
0	0.408	0.408	0.697	0.655	-0.042				0.466	0.281	-0.185
0.775	0.623	-0.152				0.682	0.701	0.019	1.223	0.892	-0.331
0.657	0.637	-0.02				0.623	0.721	0.098	1.43	0.948	-0.482
1.916	3.833	1.917				1.997	1.185	-0.812	0.596	1.077	0.481
2.283	4.009	1.726				2.456	1.227	-1.229	0.62	1.102	0.482
4.413	2.832	-1.581	0.583	0.307	-0.276	0.728	0.524	-0.204
4.486	3.878	-0.608	0.701	0.352	-0.349	0.692	0.704	0.012
2.956	3.895	0.939
3.017	4.752	1.735
0.084	0.084	0	0.476	1.222	0.746
0.111	0.071	-0.04	0.356	0.536	0.18
1.323	1.457	0.134	1.587	1.442	-0.145
1.16	1.775	0.615	1.716	1.523	-0.193

[truncated: 6 more sheets: Delta IL-1b, Delta IL-1b-Outlier, Delta IL-10, Delta IL-10-Outlier, Delta IFN-g, Delta IFN-g-Outlier]
